# Supplementary material
Source: PubMed Central journal article supplement (PMC1736068)
Supplement: jmedgene_42_6_464__1.pdf [file jmedgene_42_6_464__1.pdf]

| Gene Symbol | Gene Title                                                  | fold (B6/C3H) | P.Value     | UniGene ID |
|-------------|-------------------------------------------------------------|---------------|-------------|------------|
| H2-D1       | histocompatibility 2, D region locus 1                      | 0.06          | 2.84E-11    | Mm.33263   |
| Rpgrip1     | retinitis pigmentosa GTPase regulator interacting protein 1 | 6.50          | 5.4E-10     | Mm.21662   |
| Lin7c       | lin 7 homolog c (C. elegans)                                | 8.75          | 5.4E-10     | Mm.235300  |
| Gbp1        | guanylate nucleotide binding protein 1                      | 0.14          | 1.04E-09    | Mm.250     |
| Sfrp1       | secreted frizzled-related sequence protein 1                | 5.74          | 1.62E-09    | Mm.281691  |
| C4          | complement component 4 (within H-2S)                        | 3.78          | 6.64E-09    | Mm.16106   |
| Cap1        | CAP, adenylate cyclase-associated protein 1 (yeast)         | 0.15          | 8.27E-09    | Mm.8687    |
| Hba-a1      | hemoglobin alpha, adult chain 1                             | 0.17          | 9.9E-09     | Mm.196110  |
| Reg3g       | regenerating islet-derived 3 gamma                          | 6.23          | 5.93E-08    | Mm.252385  |
| Prdx2       | peroxiredoxin 2                                             | 2.89          | 6.02E-08    | Mm.270130  |
| Copz2       | coatamer protein complex, subunit zeta 2                    | 2.25          | 0.000000111 | Mm.22144   |
| Paip1       | polyadenylate binding protein-interacting protein 1         | 0.34          | 0.000000198 | Mm.132584  |
| Pigo        | phosphatidylinositol glycan, class O                        | 2.16          | 0.000000215 | Mm.143738  |
| Slc15a2     | solute carrier family 15 (H+/peptide transporter), member 2 | 2.27          | 0.000000215 | Mm.281804  |
| H2-K        | histocompatibility 2, K region                              | 3.76          | 0.000000482 | Mm.288170  |
| Alad        | aminolevulinate, delta-, dehydratase                        | 0.28          | 0.000000496 | Mm.90076   |
| Ltf         | lactotransferrin                                            | 4.35          | 0.00000063  | Mm.282359  |
| Runx1       | runt related transcription factor 1                         | 3.05          | 0.000000715 | Mm.162974  |
| Wars        | tryptophanyl-tRNA synthetase                                | 3.05          | 0.000000715 | Mm.38433   |
| Myh6        | myosin, heavy polypeptide 6, cardiac muscle, alpha          | 0.34          | 0.00000143  | Mm.290003  |
| Srd5a2l     | steroid 5 alpha-reductase 2-like                            | 0.46          | 0.00000167  | Mm.289446  |
| Col1a2      | procollagen, type I, alpha 2                                | 3.05          | 0.0000024   | Mm.277792  |
| Adprt13     | ADP-ribosyltransferase (NAD+; poly (ADP-ribose polymera     | 2.45          | 0.00000271  | Mm.273659  |
| Apoe        | apolipoprotein E                                            | 3.20          | 0.00000288  | Mm.259289  |
| Scgb3a1     | secretoglobin, family 3A, member 1                          | 2.28          | 0.00000311  | Mm.22802   |
| Ifi202b     | interferon activated gene 202B                              | 0.24          | 0.00000389  | Mm.218770  |
| Atp1a2      | ATPase, Na+/K+ transporting, alpha 2 polypeptide            | 0.53          | 0.00000608  | Mm.207432  |
| Muc5b       | mucin 5, subtype B, tracheobronchial                        | 2.53          | 0.00000629  | Mm.200752  |
| Col1a1      | procollagen, type I, alpha 1                                | 2.87          | 0.00000681  | Mm.277735  |
| Pglyrp      | peptidoglycan recognition protein                           | 0.45          | 0.00000695  | Mm.21855   |
| Fmo1        | flavin containing monooxygenase 1                           | 0.44          | 0.0000094   | Mm.976     |
| Sspn        | sarcospan                                                   | 2.81          | 0.00000954  | Mm.49689   |
| Gp2         | glycoprotein 2 (zymogen granule membrane)                   | 2.35          | 0.0000105   | Mm.46403   |
| Chi3l3      | chitinase 3-like 3                                          | 2.95          | 0.000011    | Mm.4571    |
| Chi3l4      | chitinase 3-like 4                                          | 3.03          | 0.0000114   | Mm.244998  |
| Wdfy1       | WD40 and FYVE domain containing 1                           | 0.44          | 0.000014    | Mm.293273  |

|          |                                                                |      |                     |
|----------|----------------------------------------------------------------|------|---------------------|
| Cd84     | CD84 antigen                                                   | 2.13 | 0.000014 Mm.259115  |
| Nme7     | non-metastatic cells 7, protein expressed in                   | 0.35 | 0.0000155 Mm.219428 |
| Abhd1    | abhydrolase domain containing 1                                | 0.56 | 0.0000155 Mm.272414 |
| Ndr4     | N-myc downstream regulated 4                                   | 1.59 | 0.0000155 Mm.29846  |
| Ppp5c    | protein phosphatase 5, catalytic subunit                       | 1.60 | 0.0000155 Mm.3294   |
| Tceb3    | transcription elongation factor B (SIII), polypeptide 3        | 1.71 | 0.0000162 Mm.27663  |
| Glo1     | glyoxalase 1                                                   | 0.48 | 0.0000164 Mm.261984 |
| Gclc     | glutamate-cysteine ligase, catalytic subunit                   | 1.98 | 0.0000164 Mm.89888  |
| Fstl1    | follistatin-like 1                                             | 2.16 | 0.0000164 Mm.182434 |
| Zfp191   | zinc finger protein 191                                        | 1.57 | 0.0000168 Mm.153618 |
| Temt     | thioether S-methyltransferase                                  | 0.44 | 0.0000174 Mm.299    |
| Sparcl1  | SPARC-like 1 (mast9, hevin)                                    | 1.63 | 0.0000174 Mm.29027  |
| Tlr1     | toll-like receptor 1                                           | 2.08 | 0.0000174 Mm.273024 |
| H2-Q7    | histocompatibility 2, Q region locus 7                         | 5.31 | 0.0000199 Mm.296496 |
| Sh3bgrl3 | SH3 domain binding glutamic acid-rich protein-like 3           | 1.76 | 0.0000229 Mm.22240  |
| Mbd1     | methyl-CpG binding domain protein 1                            | 1.94 | 0.0000229 Mm.22522  |
| H28      | histocompatibility 28                                          | 0.44 | 0.0000251 Mm.219544 |
| Mmp13    | matrix metalloproteinase 13                                    | 1.68 | 0.0000257 Mm.5022   |
| Fgfr4    | fibroblast growth factor receptor 4                            | 0.57 | 0.0000299 Mm.276715 |
| Bcl2l11  | BCL2-like 11 (apoptosis facilitator)                           | 1.79 | 0.0000299 Mm.141083 |
| Bid      | BH3 interacting domain death agonist                           | 1.74 | 0.0000302 Mm.281317 |
| Trim12   | tripartite motif protein 12                                    | 1.98 | 0.0000307 Mm.26466  |
| Irak4    | interleukin-1 receptor-associated kinase 4                     | 2.11 | 0.0000327 Mm.279655 |
| Rad51ap1 | RAD51 associated protein 1                                     | 0.46 | 0.0000356 Mm.204634 |
| Fpr1     | formyl peptide receptor-like 1                                 | 0.50 | 0.0000359 Mm.3522   |
| Trim16   | tripartite motif protein 16                                    | 2.43 | 0.0000382 Mm.117087 |
| Villp    | villin-like protein                                            | 1.72 | 0.0000395 Mm.83817  |
| C1qb     | complement component 1, q subcomponent, beta polypeptide       | 4.38 | 0.0000395 Mm.2570   |
| Trim34   | tripartite motif protein 34                                    | 3.18 | 0.0000413 Mm.219657 |
| Klk9     | kallikrein 9                                                   | 0.51 | 0.0000418 Mm.5193   |
| Adamdec1 | ADAM-like, decysin 1                                           | 2.23 | 0.0000418 Mm.36742  |
| C1qg     | complement component 1, q subcomponent, gamma polypeptide      | 3.71 | 0.0000418 Mm.3453   |
| Nnt      | nicotinamide nucleotide transhydrogenase                       | 0.50 | 0.0000423 Mm.195803 |
| Slc7a10  | solute carrier family 7 (cationic amino acid transporter, y+ s | 0.37 | 0.0000459 Mm.277439 |
| Pnpt1    | polyribonucleotide nucleotidyltransferase 1                    | 0.64 | 0.000048 Mm.272938  |
| Col5a2   | procollagen, type V, alpha 2                                   | 2.31 | 0.0000594 Mm.10299  |
| Serpine2 | serine (or cysteine) proteinase inhibitor, clade E, member 2   | 2.38 | 0.0000606 Mm.3093   |

|         |                                                                   |      |                     |
|---------|-------------------------------------------------------------------|------|---------------------|
| Procr   | protein C receptor, endothelial                                   | 0.52 | 0.0000666 Mm.3243   |
| Gas5    | growth arrest specific 5                                          | 2.31 | 0.0000666 Mm.270065 |
| Kcne3   | potassium voltage-gated channel, Isk-related subfamily, ge        | 0.53 | 0.0000744 Mm.282386 |
| Lass4   | longevity assurance homolog 4 ( <i>S. cerevisiae</i> )            | 0.70 | 0.0000744 Mm.35511  |
| Ltbp2   | latent transforming growth factor beta binding protein 2          | 1.99 | 0.0000744 Mm.3900   |
| Pla2g7  | phospholipase A2, group VII (platelet-activating factor acety     | 2.25 | 0.0000744 Mm.9277   |
| Sfn     | stratifin                                                         | 2.64 | 0.0000744 Mm.301269 |
| Cxcl14  | chemokine (C-X-C motif) ligand 14                                 | 3.86 | 0.0000744 Mm.30211  |
| Tctex1  | t-complex testis expressed 1                                      | 0.64 | 0.0000753 Mm.1948   |
| Gsto1   | glutathione S-transferase omega 1                                 | 2.30 | 0.0000758 Mm.282    |
| Sfmbt2  | Scm-like with four mbt domains 2                                  | 0.62 | 0.0000783 Mm.27840  |
| Grtp1   | GH regulated TBC protein 1                                        | 0.67 | 0.0000783 Mm.34901  |
| Socs3   | suppressor of cytokine signaling 3                                | 2.28 | 0.000082 Mm.3468    |
| Lpl     | lipoprotein lipase                                                | 1.61 | 0.0000827 Mm.1514   |
| Snx6    | sorting nexin 6                                                   | 2.06 | 0.0000881 Mm.28240  |
| Tgfb1   | transforming growth factor, beta induced                          | 2.31 | 0.0000881 Mm.14455  |
| Pcdha6  | protocadherin alpha 6                                             | 0.55 | 0.0000885 Mm.15528  |
| Ccrn4l  | CCR4 carbon catabolite repression 4-like ( <i>S. cerevisiae</i> ) | 1.96 | 0.0000909 Mm.86541  |
| Dclre1a | DNA cross-link repair 1A, PSO2 homolog ( <i>S. cerevisiae</i> )   | 0.50 | 0.000091 Mm.2805    |
| Ifi205  | interferon activated gene 205                                     | 2.71 | 0.000091 Mm.255414  |
| Slc35a5 | solute carrier family 35, member A5                               | 2.91 | 0.0000955 Mm.264984 |
| Strm    | striamin                                                          | 1.66 | 0.000104 Mm.253564  |
| Grin2c  | glutamate receptor, ionotropic, NMDA2C (epsilon 3)                | 0.59 | 0.000106 Mm.39090   |
| Siat8b  | sialyltransferase 8 (alpha-2, 8-sialyltransferase) B              | 0.61 | 0.00011 Mm.4954     |
| Mapkbp1 | mitogen activated protein kinase binding protein 1                | 0.63 | 0.000111 Mm.299387  |
| Dusp7   | dual specificity phosphatase 7                                    | 0.60 | 0.000116 Mm.275584  |
| Prkce   | protein kinase C, epsilon                                         | 0.60 | 0.000116 Mm.240216  |
| Myo7a   | myosin VIIa                                                       | 1.67 | 0.000118 Mm.1403    |
| Supt16h | suppressor of Ty 16 homolog ( <i>S. cerevisiae</i> )              | 0.68 | 0.00012 Mm.286066   |
| Cfr     | cystic fibrosis transmembrane conductance regulator homo          | 0.52 | 0.000122 Mm.15621   |
| Tor3a   | torsin family 3, member A                                         | 0.56 | 0.000123 Mm.206737  |
| Gnb1    | guanine nucleotide binding protein, beta 1                        | 0.51 | 0.000134 Mm.2344    |
| Itgb5   | integrin beta 5                                                   | 1.66 | 0.000146 Mm.6424    |
| Pstpip1 | proline-serine-threonine phosphatase-interacting protein 1        | 1.87 | 0.000147 Mm.2534    |
| Eln     | elastin                                                           | 3.56 | 0.00015 Mm.275320   |
| Ramp2   | receptor (calcitonin) activity modifying protein 2                | 0.64 | 0.000157 Mm.260698  |
| Bckdhb  | branched chain ketoacid dehydrogenase E1, beta polypept           | 0.52 | 0.000161 Mm.12819   |

|         |                                                                     |      |                    |
|---------|---------------------------------------------------------------------|------|--------------------|
| Hey1    | hairy/enhancer-of-split related with YRPW motif 1                   | 0.57 | 0.000161 Mm.29581  |
| Rarb    | retinoic acid receptor, beta                                        | 0.60 | 0.00017 Mm.259318  |
| Iqgap1  | IQ motif containing GTPase activating protein 1                     | 0.63 | 0.00017 Mm.207619  |
| Cot11   | coactosin-like 1 (Dictyostelium)                                    | 1.56 | 0.000173 Mm.141741 |
| Gabbr1  | gamma-aminobutyric acid (GABA-B) receptor, 1                        | 0.59 | 0.000175 Mm.245164 |
| Col5a1  | procollagen, type V, alpha 1                                        | 2.13 | 0.000182 Mm.7281   |
| Pttg1   | pituitary tumor-transforming 1                                      | 1.92 | 0.000186 Mm.6856   |
| Dscr111 | Down syndrome critical region gene 1-like 1                         | 0.35 | 0.000196 Mm.251242 |
| Anxa8   | annexin A8                                                          | 1.83 | 0.000196 Mm.3267   |
| Qpct    | glutaminyl-peptide cyclotransferase (glutaminyl cyclase)            | 1.75 | 0.000198 Mm.293870 |
| Cxcl12  | chemokine (C-X-C motif) ligand 12                                   | 2.07 | 0.000198 Mm.465    |
| Bcat2   | branched chain aminotransferase 2, mitochondrial                    | 0.56 | 0.000199 Mm.267405 |
| Ng23    | Ng23 protein                                                        | 0.73 | 0.000199 Mm.214512 |
| Lox     | lysyl oxidase                                                       | 2.91 | 0.000199 Mm.172    |
| Wnt5a   | wingless-related MMTV integration site 5A                           | 1.71 | 0.000203 Mm.287544 |
| Pmscl1  | polymyositis/scleroderma autoantigen 1                              | 1.52 | 0.000219 Mm.116711 |
| Mafb    | v-maf musculoaponeurotic fibrosarcoma oncogene family, 1            | 2.19 | 0.00022 Mm.298157  |
| Rnf14   | ring finger protein 14                                              | 1.52 | 0.000228 Mm.22086  |
| Mmp14   | matrix metalloproteinase 14 (membrane-inserted)                     | 2.19 | 0.000228 Mm.280175 |
| P2ry6   | pyrimidnergic receptor P2Y, G-protein coupled, 6                    | 1.98 | 0.000233 Mm.235193 |
| Ckb     | creatine kinase, brain                                              | 1.75 | 0.000238 Mm.16831  |
| Gpm6a   | glycoprotein m6a                                                    | 0.52 | 0.000239 Mm.241700 |
| Clca2   | chloride channel calcium activated 2                                | 3.29 | 0.000243 Mm.20897  |
| Prss12  | protease, serine, 12 neurotrypsin (motopsin)                        | 0.62 | 0.000253 Mm.9431   |
| Xdh     | xanthine dehydrogenase                                              | 2.87 | 0.000263 Mm.11223  |
| Cyp2b20 | cytochrome P450, family 2, subfamily b, polypeptide 20              | 0.53 | 0.000269 Mm.218749 |
| Bmp6    | bone morphogenetic protein 6                                        | 0.48 | 0.000274 Mm.254978 |
| Hebp1   | heme binding protein 1                                              | 0.48 | 0.000277 Mm.247996 |
| Bmp4    | bone morphogenetic protein 4                                        | 0.57 | 0.000279 Mm.6813   |
| Gpr97   | G protein-coupled receptor 97                                       | 1.39 | 0.000281 Mm.27995  |
| Apobec3 | apolipoprotein B editing complex 3                                  | 2.22 | 0.000286 Mm.227489 |
| Cdh16   | cadherin 16                                                         | 0.57 | 0.000302 Mm.19423  |
| Slc2a9  | solute carrier family 2 (facilitated glucose transporter), member 9 | 0.63 | 0.000306 Mm.17389  |
| Enpp4   | ectonucleotide pyrophosphatase/phosphodiesterase 4                  | 0.50 | 0.000317 Mm.290707 |
| Gig1    | glucocorticoid induced gene 1                                       | 0.55 | 0.000319 Mm.212908 |
| Il1a    | interleukin 1 alpha                                                 | 0.72 | 0.000319 Mm.15534  |
| Mfap5   | microfibrillar associated protein 5                                 | 1.61 | 0.00032 Mm.41931   |

|          |                                                               |      |                    |
|----------|---------------------------------------------------------------|------|--------------------|
| Arvcf    | armadillo repeat gene deleted in velo-cardio-facial syndrom   | 0.55 | 0.00033 Mm.293599  |
| Fcgr2b   | Fc receptor, IgG, low affinity IIb                            | 2.60 | 0.000336 Mm.22119  |
| Capn5    | calpain 5                                                     | 1.38 | 0.000342 Mm.10682  |
| Clca1    | chloride channel calcium activated 1                          | 3.14 | 0.000342 Mm.275745 |
| Per3     | period homolog 3 (Drosophila)                                 | 0.49 | 0.000343 Mm.121361 |
| Ifngr2   | interferon gamma receptor 2                                   | 1.63 | 0.000343 Mm.249364 |
| Adam8    | a disintegrin and metalloprotease domain 8                    | 2.03 | 0.000347 Mm.15969  |
| Lysal1   | lysosomal apyrase-like 1                                      | 1.53 | 0.000359 Mm.291443 |
| Abp1     | amiloride binding protein 1 (amine oxidase, copper-containi   | 1.69 | 0.000364 Mm.7190   |
| Ncr1     | natural cytotoxicity triggering receptor 1                    | 0.60 | 0.00037 Mm.41980   |
| Khdrbs3  | KH domain containing, RNA binding, signal transduction as     | 1.65 | 0.00037 Mm.17964   |
| Ptpla    | protein tyrosine phosphatase-like (proline instead of catalyt | 1.72 | 0.00037 Mm.241205  |
| Epb4.113 | erythrocyte protein band 4.1-like 3                           | 0.68 | 0.000375 Mm.131135 |
| Fbn1     | fibrillin 1                                                   | 1.81 | 0.000377 Mm.271644 |
| Lrrfip1  | leucine rich repeat (in FLII) interacting protein 1           | 0.60 | 0.000384 Mm.45039  |
| Cables1  | Cdk5 and Abl enzyme substrate 1                               | 0.66 | 0.000397 Mm.40717  |
| Rnf149   | ring finger protein 149                                       | 1.55 | 0.000397 Mm.28614  |
| Sc5d     | sterol-C5-desaturase (fungal ERG3, delta-5-desaturase) hc     | 2.08 | 0.000397 Mm.32700  |
| Tff2     | trefoil factor 2 (spasmolytic protein 1)                      | 1.65 | 0.000398 Mm.1825   |
| Trem2b   | triggering receptor expressed on myeloid cells 2b             | 1.93 | 0.000399 Mm.261623 |
| Imap38   | immunity-associated protein                                   | 0.58 | 0.00041 Mm.197478  |
| Kdelr3   | KDEL (Lys-Asp-Glu-Leu) endoplasmic reticulum protein ret      | 1.74 | 0.00041 Mm.29644   |
| C2ta     | class II transactivator                                       | 0.70 | 0.000418 Mm.249560 |
| Arg1     | arginase 1, liver                                             | 8.94 | 0.000418 Mm.154144 |
| Clasp2   | CLIP associating protein 2                                    | 0.63 | 0.000424 Mm.222272 |
| Ccr12    | chemokine (C-C motif) receptor-like 2                         | 0.71 | 0.00043 Mm.7336    |
| Ctsh     | cathepsin H                                                   | 1.76 | 0.000459 Mm.2277   |
| Car4     | carbonic anhydrase 4                                          | 0.36 | 0.000465 Mm.1641   |
| Zfp386   | zinc finger protein 386 (Kruppel-like)                        | 1.46 | 0.000466 Mm.254997 |
| Tnc      | tenascin C                                                    | 3.29 | 0.000492 Mm.980    |
| Apln     | apelin                                                        | 0.56 | 0.000498 Mm.29262  |
| Fn1      | fibronectin 1                                                 | 2.06 | 0.000506 Mm.193099 |
| Gpt1     | glutamic pyruvic transaminase 1, soluble                      | 0.62 | 0.000518 Mm.30130  |
| Anks1    | ankyrin repeat and SAM domain containing 1                    | 0.72 | 0.000518 Mm.32556  |
| Dio2     | deiodinase, iodothyronine, type II                            | 1.40 | 0.000523 Mm.21389  |
| Litaf    | LPS-induced TN factor                                         | 1.64 | 0.00053 Mm.294753  |
| Cnot7    | CCR4-NOT transcription complex, subunit 7                     | 0.53 | 0.000538 Mm.272551 |

|          |                                                                  |      |                    |
|----------|------------------------------------------------------------------|------|--------------------|
| Myl3     | myosin, light polypeptide 3, alkali; ventricular, skeletal, slow | 0.59 | 0.000538 Mm.7353   |
| Tshb     | thyroid stimulating hormone, beta subunit                        | 0.72 | 0.000538 Mm.110730 |
| Uchl1    | ubiquitin carboxy-terminal hydrolase L1                          | 1.46 | 0.000538 Mm.113770 |
| Fbln2    | fibulin 2                                                        | 2.33 | 0.000538 Mm.249146 |
| Fbp2     | fructose bisphosphatase 2                                        | 0.61 | 0.000544 Mm.289741 |
| Mod1     | malic enzyme, supernatant                                        | 1.49 | 0.000544 Mm.298213 |
| Itgav    | integrin alpha V                                                 | 1.60 | 0.000552 Mm.227    |
| Cyp4b1   | cytochrome P450, family 4, subfamily b, polypeptide 1            | 0.63 | 0.000556 Mm.1840   |
| Gstm1    | glutathione S-transferase, mu 1                                  | 0.54 | 0.000564 Mm.2011   |
| Rpl15    | ribosomal protein L15                                            | 0.57 | 0.000564 Mm.296730 |
| Akr1e1   | aldo-keto reductase family 1, member E1                          | 1.34 | 0.000564 Mm.251908 |
| Thbs1    | thrombospondin 1                                                 | 3.07 | 0.000564 Mm.4159   |
| Fst      | folliculin                                                       | 4.11 | 0.000564 Mm.4913   |
| Madh4    | MAD homolog 4 (Drosophila)                                       | 1.56 | 0.000566 Mm.100399 |
| Agtrl1   | angiotensin receptor-like 1                                      | 0.48 | 0.000571 Mm.29368  |
| Retnla   | resistin like alpha                                              | 3.51 | 0.000575 Mm.33772  |
| Cd97     | CD97 antigen                                                     | 0.59 | 0.000621 Mm.182255 |
|          | 38234 septin 4                                                   | 0.53 | 0.000622 Mm.2214   |
| Slc30a7  | solute carrier family 30 (zinc transporter), member 7            | 1.42 | 0.000622 Mm.254626 |
| Ctss     | cathepsin S                                                      | 1.49 | 0.000622 Mm.3619   |
| Cdc42ep4 | CDC42 effector protein (Rho GTPase binding) 4                    | 1.94 | 0.000622 Mm.293378 |
| Adamts4  | a disintegrin-like and metalloprotease (reprolysin type) with    | 1.44 | 0.000625 Mm.23156  |
| Notch4   | Notch gene homolog 4 (Drosophila)                                | 0.55 | 0.000626 Mm.173813 |
| Col3a1   | procollagen, type III, alpha 1                                   | 1.69 | 0.000629 Mm.249555 |
| Taf7     | TAF7 RNA polymerase II, TATA box binding protein (TBP)-          | 1.42 | 0.00063 Mm.236009  |
| Gria1    | glutamate receptor, ionotropic, AMPA1 (alpha 1)                  | 0.55 | 0.000645 Mm.4920   |
| Noxo1    | NADPH oxidase organizer 1                                        | 0.68 | 0.000653 Mm.269293 |
| Mgat2    | mannoside acetylglucosaminyltransferase 2                        | 1.41 | 0.000673 Mm.206642 |
| Rgs18    | regulator of G-protein signaling 18                              | 0.46 | 0.000693 Mm.253927 |
| Krt1-23  | keratin complex 1, acidic, gene 23                               | 0.62 | 0.000702 Mm.279767 |
| Ccr5     | chemokine (C-C motif) receptor 5                                 | 1.89 | 0.000704 Mm.14302  |
| Vps33b   | vacuolar protein sorting 33B (yeast)                             | 0.62 | 0.000712 Mm.37879  |
| Abca1    | ATP-binding cassette, sub-family A (ABC1), member 1              | 1.49 | 0.000712 Mm.277376 |
| Pi4k2a   | phosphatidylinositol 4-kinase type 2 alpha                       | 2.13 | 0.000712 Mm.117037 |
| Map3k6   | mitogen-activated protein kinase kinase kinase 6                 | 2.20 | 0.000713 Mm.36640  |
| Tm4sf13  | transmembrane 4 superfamily member 13                            | 0.51 | 0.000722 Mm.254663 |
| B3gnt3   | UDP-GlcNAc:betaGal beta-1,3-N-acetylglucosaminyltransf           | 1.43 | 0.000722 Mm.290837 |

|           |                                                           |      |                    |
|-----------|-----------------------------------------------------------|------|--------------------|
| Mrpl35    | mitochondrial ribosomal protein L35                       | 1.57 | 0.000722 Mm.28579  |
| Tnnt1     | troponin T1, skeletal, slow                               | 0.53 | 0.000724 Mm.258670 |
| Cxcl16    | chemokine (C-X-C motif) ligand 16                         | 1.56 | 0.000727 Mm.301293 |
| Tm4sf2    | transmembrane 4 superfamily member 2                      | 0.66 | 0.000737 Mm.18590  |
| Tacc2     | transforming, acidic coiled-coil containing protein 2     | 0.71 | 0.000753 Mm.86322  |
| Snx10     | sorting nexin 10                                          | 1.35 | 0.000753 Mm.294166 |
| Arhc      | ras homolog gene family, member C                         | 1.55 | 0.000753 Mm.262    |
| Nnmt      | nicotinamide N-methyltransferase                          | 2.41 | 0.000756 Mm.8362   |
| Clu       | clusterin                                                 | 1.69 | 0.00076 Mm.200608  |
| Siat10    | sialyltransferase 10 (alpha-2,3-sialyltransferase VI)     | 0.67 | 0.000763 Mm.212742 |
| Cebpd     | CCAAT/enhancer binding protein (C/EBP), delta             | 1.67 | 0.000768 Mm.272602 |
| Epha1     | Eph receptor A1                                           | 0.72 | 0.000776 Mm.251772 |
| Abcc3     | ATP-binding cassette, sub-family C (CFTR/MRP), member     | 0.61 | 0.00081 Mm.23942   |
| Dhrs8     | dehydrogenase/reductase (SDR family) member 8             | 0.43 | 0.000812 Mm.239333 |
| Fah       | fumarylacetoacetate hydrolase                             | 0.70 | 0.000819 Mm.3798   |
| Fv1       | Friend virus susceptibility 1                             | 0.76 | 0.000826 Mm.57220  |
| Cdkn2c    | cyclin-dependent kinase inhibitor 2C (p18, inhibits CDK4) | 0.64 | 0.000827 Mm.1912   |
| H2-T24    | histocompatibility 2, T region locus 24                   | 0.56 | 0.000828 Mm.14573  |
| Galnt2    | UDP-N-acetyl-alpha-D-galactosamine:polypeptide N-acetyl-  | 2.51 | 0.000828 Mm.33808  |
| Ces3      | carboxylesterase 3                                        | 0.66 | 0.000831 Mm.292803 |
| Dnajc5    | DnaJ (Hsp40) homolog, subfamily C, member 5               | 1.41 | 0.000847 Mm.140761 |
| Sgcb      | sarcoglycan, beta (dystrophin-associated glycoprotein)    | 0.63 | 0.000854 Mm.89310  |
| Icam2     | intercellular adhesion molecule 2                         | 0.53 | 0.000855 Mm.394    |
| Agtrap    | angiotensin II, type I receptor-associated protein        | 1.42 | 0.000868 Mm.262174 |
| Bex2      | brain expressed X-linked 2                                | 0.60 | 0.000877 Mm.94160  |
| LOC230857 | endothelin converting enzyme 1                            | 0.69 | 0.000882 Mm.294384 |
| Ccl12     | chemokine (C-C motif) ligand 12                           | 3.14 | 0.000906 Mm.867    |
| Entpd1    | ectonucleoside triphosphate diphosphohydrolase 1          | 1.50 | 0.000914 Mm.2824   |
| Brp17     | brain protein 17                                          | 0.61 | 0.00092 Mm.248635  |
| Elf5      | E74-like factor 5                                         | 0.56 | 0.000921 Mm.20888  |
| Apoc2     | apolipoprotein C-II                                       | 2.17 | 0.000925 Mm.28394  |
| Krt1-18   | keratin complex 1, acidic, gene 18                        | 1.80 | 0.000953 Mm.22479  |
| Hal       | histidine ammonia lyase                                   | 0.29 | 0.000972 Mm.13000  |
| Timp1     | tissue inhibitor of metalloproteinase 1                   | 5.06 | 0.000972 Mm.8245   |
| Ctnn      | cortactin                                                 | 1.42 | 0.000974 Mm.205601 |
| C1qa      | complement component 1, q subcomponent, alpha polypep     | 2.83 | 0.000981 Mm.370    |
| Cltc      | clathrin, heavy polypeptide (Hc)                          | 1.33 | 0.00106 Mm.254588  |

|         |                                                               |      |                   |
|---------|---------------------------------------------------------------|------|-------------------|
| Snrk    | SNF related kinase                                            | 0.64 | 0.00108 Mm.257989 |
| Utrn    | utrophin                                                      | 0.62 | 0.00109 Mm.253554 |
| Pnp     | purine-nucleoside phosphorylase                               | 1.45 | 0.00109 Mm.17932  |
| Madh6   | MAD homolog 6 (Drosophila)                                    | 0.60 | 0.00114 Mm.27935  |
| Csda    | cold shock domain protein A                                   | 1.42 | 0.00114 Mm.193526 |
| Pvrl3   | poliovirus receptor-related 3                                 | 1.48 | 0.00117 Mm.135989 |
| Cyp4f18 | cytochrome P450, family 4, subfamily f, polypeptide 18        | 1.85 | 0.00117 Mm.160020 |
| Tncc    | troponin C, cardiac/slow skeletal                             | 0.54 | 0.00118 Mm.712    |
| Mgll    | monoglyceride lipase                                          | 0.64 | 0.00118 Mm.272197 |
| Spred1  | sprouty protein with EVH-1 domain 1, related sequence         | 1.44 | 0.00119 Mm.245890 |
| Tmod4   | tropomodulin 4                                                | 0.75 | 0.0012 Mm.71935   |
| Aqr     | aquarius                                                      | 1.38 | 0.0012 Mm.2545    |
| Ggcx    | gamma-glutamyl carboxylase                                    | 1.55 | 0.0012 Mm.19937   |
| Crym    | crystallin, mu                                                | 0.66 | 0.00122 Mm.9114   |
| Galnt11 | UDP-N-acetyl-alpha-D-galactosamine:polypeptide N-acetyl-      | 0.69 | 0.00122 Mm.246718 |
| Mmp8    | matrix metalloproteinase 8                                    | 1.54 | 0.00122 Mm.16415  |
| Igf1    | insulin-like growth factor 1                                  | 1.93 | 0.00122 Mm.268521 |
| Gprc5b  | G protein-coupled receptor, family C, group 5, member B       | 0.50 | 0.00124 Mm.103439 |
| Fcgr1   | Fc receptor, IgG, high affinity I                             | 2.19 | 0.00125 Mm.150    |
| Ms4a11  | membrane-spanning 4-domains, subfamily A, member 11           | 2.46 | 0.00125 Mm.271843 |
| Adamts8 | a disintegrin-like and metalloprotease (reprolysin type) with | 0.76 | 0.00126 Mm.100582 |
| Osmr    | oncostatin M receptor                                         | 1.66 | 0.00129 Mm.10760  |
| Pumag   | interferon-gamma inducible gene, Puma-g                       | 0.72 | 0.00131 Mm.77690  |
| Emr1    | EGF-like module containing, mucin-like, hormone receptor-     | 1.49 | 0.00132 Mm.2254   |
| Plagl1  | pleiomorphic adenoma gene-like 1                              | 0.66 | 0.00135 Mm.287857 |
| Papss2  | 3'-phosphoadenosine 5'-phosphosulfate synthase 2              | 1.54 | 0.00138 Mm.203916 |
| Stmn2   | stathmin-like 2                                               | 0.54 | 0.00139 Mm.29580  |
| Mcfcd2  | multiple coagulation factor deficiency 2                      | 1.41 | 0.0014 Mm.30251   |
| Myl4    | myosin, light polypeptide 4, alkali; atrial, embryonic        | 0.42 | 0.00141 Mm.247636 |
| G0s2    | G0/G1 switch gene 2                                           | 0.62 | 0.00146 Mm.3283   |
| Tuba8   | tubulin, alpha 8                                              | 0.71 | 0.00146 Mm.32884  |
| Lgmn    | legumain                                                      | 1.67 | 0.00147 Mm.17185  |
| Mapk12  | mitogen-activated protein kinase 12                           | 0.67 | 0.00148 Mm.38343  |
| Chst1   | carbohydrate (keratan sulfate Gal-6) sulfotransferase 1       | 0.71 | 0.0015 Mm.38021   |
| Kif5b   | kinesin family member 5B                                      | 1.74 | 0.0015 Mm.223744  |
| Il13ra1 | interleukin 13 receptor, alpha 1                              | 1.41 | 0.00154 Mm.24208  |
| L259    | L259                                                          | 0.56 | 0.00156 Mm.89556  |



|          |                                                               |      |                   |
|----------|---------------------------------------------------------------|------|-------------------|
| Qscn6    | quiescin Q6                                                   | 1.63 | 0.00156 Mm.297925 |
| Lmo2     | LIM domain only 2                                             | 0.59 | 0.00157 Mm.29266  |
| Npnt     | nephronectin                                                  | 0.62 | 0.0016 Mm.279310  |
| Pygl     | liver glycogen phosphorylase                                  | 0.59 | 0.00163 Mm.256926 |
| Fmod     | fibromodulin                                                  | 1.35 | 0.00167 Mm.287146 |
| Cd16411  | CD164 sialomucin-like 1                                       | 1.42 | 0.00168 Mm.29597  |
| Rin1     | Ras and Rab interactor 1                                      | 1.48 | 0.00168 Mm.55192  |
| Nfil3    | nuclear factor, interleukin 3, regulated                      | 1.99 | 0.00168 Mm.136604 |
| Ear1     | eosinophil-associated ribonuclease 1                          | 0.37 | 0.0017 Mm.86948   |
| Ctsk     | cathepsin K                                                   | 0.61 | 0.0017 Mm.3109    |
| Upp1     | uridine phosphorylase 1                                       | 0.65 | 0.0017 Mm.4610    |
| Spon1    | spondin 1, (f-spondin) extracellular matrix protein           | 1.42 | 0.0017 Mm.121116  |
| Adamts1  | a disintegrin-like and metalloprotease (reprolysin type) with | 1.58 | 0.0017 Mm.1421    |
| Actg2    | actin, gamma 2, smooth muscle, enteric                        | 1.71 | 0.0017 Mm.292865  |
| Tfpi2    | tissue factor pathway inhibitor 2                             | 1.78 | 0.0017 Mm.25612   |
| MGC29978 | 3-ketoacyl-CoA thiolase B                                     | 0.50 | 0.00171 Mm.224885 |
| Mmp3     | matrix metalloproteinase 3                                    | 2.30 | 0.00176 Mm.4993   |
| Tmem7    | transmembrane protein 7                                       | 0.66 | 0.00186 Mm.215259 |
| Klra3    | killer cell lectin-like receptor, subfamily A, member 3       | 0.48 | 0.00191 Mm.298156 |
| Fancc    | Fanconi anemia, complementation group C                       | 0.75 | 0.00191 Mm.126106 |
| Mglap    | matrix gamma-carboxyglutamate (gla) protein                   | 1.41 | 0.00191 Mm.243085 |
| Siat7b   | sialyltransferase 7 ((alpha-N-acetylneuraminy) 2,3-beta-gal:  | 0.73 | 0.00192 Mm.3947   |
| Gata3    | GATA binding protein 3                                        | 0.79 | 0.00192 Mm.606    |
| Ctsb     | cathepsin B                                                   | 1.53 | 0.00193 Mm.236553 |
| Lyzs     | lysozyme                                                      | 0.53 | 0.00196 Mm.45436  |
| Bicc1    | bicaudal C homolog 1 (Drosophila)                             | 1.66 | 0.00196 Mm.286834 |
| Peg3     | paternally expressed 3                                        | 1.39 | 0.002 Mm.298237   |
| Rnf41    | ring finger protein 41                                        | 1.37 | 0.00205 Mm.294120 |
| C3ar1    | complement component 3a receptor 1                            | 2.20 | 0.00206 Mm.2408   |
| Chst2    | carbohydrate sulfotransferase 2                               | 0.68 | 0.00207 Mm.212446 |
| Eng      | endoglin                                                      | 0.70 | 0.00207 Mm.277741 |
| Npl      | N-acetylneuraminase pyruvate lyase                            | 1.80 | 0.00207 Mm.24887  |
| Zfx1b    | zinc finger homeobox 1b                                       | 2.14 | 0.00207 Mm.209368 |
| Atp2a3   | ATPase, Ca <sup>++</sup> transporting, ubiquitous             | 0.60 | 0.00211 Mm.6306   |
| Msra     | methionine sulfoxide reductase A                              | 0.78 | 0.00212 Mm.26713  |
| Meis1    | myeloid ecotropic viral integration site 1                    | 0.64 | 0.00216 Mm.260855 |
| Cd59a    | CD59a antigen                                                 | 0.67 | 0.00219 Mm.247265 |

|           |                                                               |      |                   |
|-----------|---------------------------------------------------------------|------|-------------------|
| Nrd1      | nardilysin, N-arginine dibasic convertase, NRD convertase     | 0.77 | 0.00219 Mm.274950 |
| Sell      | selectin, lymphocyte                                          | 0.72 | 0.00222 Mm.1461   |
| Bpnt1     | bisphosphate 3'-nucleotidase 1                                | 1.36 | 0.00224 Mm.227549 |
| Dpp4      | dipeptidylpeptidase 4                                         | 0.39 | 0.00225 Mm.1151   |
| Rab4a     | RAB4A, member RAS oncogene family                             | 0.68 | 0.00225 Mm.9221   |
| Hist1h4i  | histone 1, H4i                                                | 0.70 | 0.00226 Mm.14775  |
| Rgs16     | regulator of G-protein signaling 16                           | 1.38 | 0.00227 Mm.181709 |
| Glrx1     | glutaredoxin 1 (thioltransferase)                             | 1.51 | 0.00227 Mm.25844  |
| Tagln     | transgelin                                                    | 1.59 | 0.00227 Mm.283283 |
| Mark1     | MAP/microtubule affinity-regulating kinase 1                  | 1.35 | 0.00228 Mm.219860 |
| Col17a1   | procollagen, type XVII, alpha 1                               | 0.73 | 0.0023 Mm.1225    |
| Sdc2      | syndecan 2                                                    | 1.39 | 0.0023 Mm.234266  |
| Tdrd3     | tudor domain containing 3                                     | 0.53 | 0.00231 Mm.250990 |
| Rpl36     | ribosomal protein L36                                         | 1.43 | 0.00231 Mm.21421  |
| Fcer1g    | Fc receptor, IgE, high affinity I, gamma polypeptide          | 1.61 | 0.00231 Mm.22673  |
| Cald1     | caldesmon 1                                                   | 2.11 | 0.00231 Mm.212567 |
| Gadd45g   | growth arrest and DNA-damage-inducible 45 gamma               | 2.11 | 0.00234 Mm.281298 |
| Kcnq1     | potassium voltage-gated channel, subfamily Q, member 1        | 0.80 | 0.00236 Mm.5177   |
| Ptger4    | prostaglandin E receptor 4 (subtype EP4)                      | 1.72 | 0.00238 Mm.18509  |
| Tnfsf9    | tumor necrosis factor (ligand) superfamily, member 9          | 1.60 | 0.00242 Mm.41171  |
| Adam28    | a disintegrin and metalloprotease domain 28                   | 1.40 | 0.00244 Mm.117450 |
| Npn1      | neoplastic progression 1                                      | 1.89 | 0.00244 Mm.29567  |
| Mbd4      | methyl-CpG binding domain protein 4                           | 1.37 | 0.00247 Mm.259308 |
| Kdr       | kinase insert domain protein receptor                         | 0.57 | 0.00255 Mm.285    |
| Col13a1   | procollagen, type XIII, alpha 1                               | 0.72 | 0.00255 Mm.10805  |
| Abca8a    | ATP-binding cassette, sub-family A (ABC1), member 8a          | 0.61 | 0.00256 Mm.298496 |
| Dapk2     | death-associated kinase 2                                     | 0.63 | 0.00256 Mm.41755  |
| Fn5       | FN5 protein                                                   | 0.72 | 0.00256 Mm.86572  |
| Crnk1l1   | Crn, crooked neck-like 1 (Drosophila)                         | 0.77 | 0.00256 Mm.248755 |
| Pard6g    | par-6 partitioning defective 6 homolog gamma (C. elegans)     | 0.78 | 0.00256 Mm.24678  |
| Serpina3n | serine (or cysteine) proteinase inhibitor, clade A, member 3  | 3.18 | 0.00256 Mm.22650  |
| Rtn2      | reticulon 2 (Z-band associated protein)                       | 0.72 | 0.00257 Mm.24142  |
| Prx       | periaxin                                                      | 0.74 | 0.00257 Mm.10119  |
| Irs1      | insulin receptor substrate 1                                  | 0.56 | 0.00259 Mm.4952   |
| Palmd     | palmdelphin                                                   | 0.59 | 0.00265 Mm.253736 |
| Ly75      | lymphocyte antigen 75                                         | 0.75 | 0.00269 Mm.2074   |
| Edg8      | endothelial differentiation, sphingolipid G-protein-coupled r | 0.78 | 0.00269 Mm.190619 |

|          |                                                              |      |                   |
|----------|--------------------------------------------------------------|------|-------------------|
| Pgrmc1   | progesterone receptor membrane component 1                   | 0.68 | 0.00271 Mm.9052   |
| Klf7     | Kruppel-like factor 7 (ubiquitous)                           | 2.11 | 0.00271 Mm.29466  |
| Ntan1    | N-terminal Asn amidase                                       | 1.92 | 0.00272 Mm.181830 |
| Emr4     | EGF-like module containing, mucin-like, hormone receptor-    | 0.59 | 0.00282 Mm.210497 |
| Adcy9    | adenylate cyclase 9                                          | 0.75 | 0.00282 Mm.4294   |
| Tslpr    | thymic stromal-derived lymphopoietin, receptor               | 1.38 | 0.00282 Mm.35771  |
| Fkbp10   | FK506 binding protein 10                                     | 1.76 | 0.00282 Mm.3894   |
| Tgm1     | transglutaminase 1, K polypeptide                            | 1.47 | 0.00287 Mm.41964  |
| Popdc2   | popeye domain containing 2                                   | 0.79 | 0.00291 Mm.286858 |
| Gpnmb    | glycoprotein (transmembrane) nmb                             | 1.40 | 0.00291 Mm.23567  |
| Rap2b    | RAP2B, member of RAS oncogene family                         | 1.78 | 0.00291 Mm.273288 |
| Fkbp5    | FK506 binding protein 5                                      | 2.91 | 0.00291 Mm.276405 |
| Efna1    | ephrin A1                                                    | 0.67 | 0.00293 Mm.15675  |
| Dll4     | delta-like 4 (Drosophila)                                    | 0.61 | 0.00297 Mm.143719 |
| Maoa     | monoamine oxidase A                                          | 0.76 | 0.00297 Mm.21108  |
| Xpr1     | xenotropic and polytropic retrovirus receptor 1              | 0.69 | 0.00299 Mm.89968  |
| Atp9a    | ATPase, class II, type 9A                                    | 0.74 | 0.00299 Mm.10288  |
| Slc39a14 | solute carrier family 39 (zinc transporter), member 14       | 2.03 | 0.00299 Mm.270647 |
| Picalm   | phosphatidylinositol binding clathrin assembly protein       | 1.35 | 0.00301 Mm.235175 |
| Tce1     | T-complex expressed gene 1                                   | 1.41 | 0.00301 Mm.274794 |
| Nudt6    | nudix (nucleoside diphosphate linked moiety X)-type motif 6  | 0.75 | 0.00302 Mm.30820  |
| Myoz2    | myozenin 2                                                   | 0.58 | 0.00307 Mm.141157 |
| Cab140   | calcium binding protein 140                                  | 0.71 | 0.00316 Mm.116721 |
| Aars     | alanyl-tRNA synthetase                                       | 1.35 | 0.00316 Mm.24174  |
| Pla2g1b  | phospholipase A2, group IB, pancreas                         | 0.75 | 0.00317 Mm.20190  |
| Msh5     | mutS homolog 5 (E. coli)                                     | 0.75 | 0.00318 Mm.24192  |
| Nars     | asparaginyl-tRNA synthetase                                  | 1.24 | 0.00318 Mm.29192  |
| Fxyd5    | FXYP domain-containing ion transport regulator 5             | 1.34 | 0.00318 Mm.1870   |
| Sphk1    | sphingosine kinase 1                                         | 2.39 | 0.00325 Mm.20944  |
| Ptp4a1   | protein tyrosine phosphatase 4a1                             | 1.49 | 0.00326 Mm.262000 |
| Egr2     | early growth response 2                                      | 1.54 | 0.00327 Mm.290421 |
| Pmm1     | phosphomannomutase 1                                         | 1.41 | 0.00328 Mm.18939  |
| Ppfibp2  | protein tyrosine phosphatase, receptor-type, F interacting p | 0.73 | 0.00336 Mm.2817   |
| Mfng     | manic fringe homolog (Drosophila)                            | 0.76 | 0.00336 Mm.149235 |
| Hebp2    | heme binding protein 2                                       | 0.77 | 0.00336 Mm.35551  |
| Ppp2r5c  | protein phosphatase 2, regulatory subunit B (B56), gamma     | 1.38 | 0.00347 Mm.240396 |
| Edil3    | EGF-like repeats and discordin I-like domains 3              | 0.71 | 0.00349 Mm.255272 |

|           |                                                                |      |                   |
|-----------|----------------------------------------------------------------|------|-------------------|
| Map3k4    | mitogen activated protein kinase kinase kinase 4               | 0.73 | 0.0035 Mm.28587   |
| Ankrd17   | ankyrin repeat domain 17                                       | 0.75 | 0.00352 Mm.245522 |
| Cat       | catalase                                                       | 0.57 | 0.00359 Mm.4215   |
| Edg7      | endothelial differentiation, lysophosphatidic acid G-protein-c | 0.52 | 0.00364 Mm.155520 |
| Clecsf6   | C-type (calcium dependent, carbohydrate recognition doma       | 1.45 | 0.00365 Mm.47384  |
| Asah1     | N-acylsphingosine amidohydrolase 1                             | 1.34 | 0.00367 Mm.22547  |
| Zdhhc2    | zinc finger, DHHC domain containing 2                          | 0.77 | 0.00373 Mm.34326  |
| Sgsh      | N-sulfoglucosamine sulfohydrolase (sulfamidase)                | 0.78 | 0.00374 Mm.103788 |
| Itih4     | inter alpha-trypsin inhibitor, heavy chain 4                   | 0.66 | 0.00375 Mm.34819  |
| Emp2      | epithelial membrane protein 2                                  | 0.76 | 0.00375 Mm.246009 |
| Frzb      | frizzled-related protein                                       | 1.32 | 0.00375 Mm.136022 |
| LOC209387 | tripartite motif protein 30-like                               | 1.43 | 0.00375 Mm.295781 |
| Acvr2b    | activin receptor IIB                                           | 0.75 | 0.00378 Mm.8940   |
| Crim1     | cysteine-rich motor neuron 1                                   | 1.67 | 0.00378 Mm.19271  |
| Snx5      | sorting nexin 5                                                | 1.34 | 0.00383 Mm.273379 |
| Car2      | carbonic anhydrase 2                                           | 0.77 | 0.00384 Mm.1186   |
| Dst       | dystonin                                                       | 0.65 | 0.0039 Mm.25326   |
| Aps       | adaptor protein with pleckstrin homology and src               | 1.31 | 0.0039 Mm.277333  |
| Foxo1     | forkhead box O1                                                | 0.78 | 0.00393 Mm.29891  |
| Eno3      | enolase 3, beta muscle                                         | 0.60 | 0.00395 Mm.251322 |
| Aldh7a1   | aldehyde dehydrogenase family 7, member A1                     | 0.75 | 0.00395 Mm.30250  |
| Rec8L1    | REC8-like 1 (yeast)                                            | 1.31 | 0.00398 Mm.23149  |
| Lzp-s     | P lysozyme structural                                          | 0.75 | 0.00401 Mm.177539 |
| Dab2      | disabled homolog 2 (Drosophila)                                | 1.60 | 0.00401 Mm.240830 |
| Rbp4      | retinol binding protein 4, plasma                              | 0.52 | 0.00402 Mm.2605   |
| Gjb3      | gap junction membrane channel protein beta 3                   | 1.50 | 0.00404 Mm.90003  |
| Sec63     | SEC63-like (S. cerevisiae)                                     | 1.41 | 0.00406 Mm.214344 |
| Siat4a    | sialyltransferase 4A (beta-galactoside alpha-2,3-sialyltransf  | 1.46 | 0.00406 Mm.248334 |
| Pcdh7     | protocadherin 7                                                | 1.73 | 0.00406 Mm.255488 |
| Vegfa     | vascular endothelial growth factor A                           | 0.69 | 0.00409 Mm.31540  |
| Gsr       | glutathione reductase 1                                        | 1.35 | 0.00413 Mm.283573 |
| Aoah      | acyloxyacyl hydrolase                                          | 1.41 | 0.00416 Mm.159294 |
| Scoc      | short coiled-coil protein                                      | 1.45 | 0.00416 Mm.300476 |
| Fgf18     | fibroblast growth factor 18                                    | 0.78 | 0.00419 Mm.246671 |
| Sox7      | SRY-box containing gene 7                                      | 0.51 | 0.0042 Mm.42162   |
| Fmo5      | flavin containing monooxygenase 5                              | 0.66 | 0.0042 Mm.281718  |
| Cnr2      | cannabinoid receptor 2 (macrophage)                            | 0.72 | 0.0042 Mm.297251  |

|          |                                                              |      |                   |
|----------|--------------------------------------------------------------|------|-------------------|
| Serpine1 | serine (or cysteine) proteinase inhibitor, clade E, member 1 | 1.86 | 0.0042 Mm.250422  |
| Arhu     | ras homolog gene family, member U                            | 1.61 | 0.00425 Mm.168257 |
| Dmd      | dystrophin, muscular dystrophy                               | 0.74 | 0.00426 Mm.275608 |
| Efnb2    | ephrin B2                                                    | 0.68 | 0.00436 Mm.209813 |
| Cib1     | calcium and integrin binding 1 (calmyrin)                    | 0.77 | 0.00437 Mm.30217  |
| Rasgrf2  | RAS protein-specific guanine nucleotide-releasing factor 2   | 0.78 | 0.00438 Mm.57233  |
| B4galt6  | UDP-Gal:betaGlcNAc beta 1,4-galactosyltransferase, polyp     | 1.26 | 0.00438 Mm.290717 |
| Prickle1 | prickle like 1 (Drosophila)                                  | 0.56 | 0.00441 Mm.293502 |
| Nfkb2    | nuclear factor of kappa light polypeptide gene enhancer in I | 1.28 | 0.00441 Mm.102365 |
| Ccl9     | chemokine (C-C motif) ligand 9                               | 2.25 | 0.00441 Mm.2271   |
| Plxdc1   | plexin domain containing 1                                   | 0.76 | 0.00443 Mm.39617  |
| Cygb     | cytoglobin                                                   | 1.65 | 0.00443 Mm.34598  |
| Ubap1    | ubiquitin-associated protein 1                               | 1.30 | 0.00452 Mm.289795 |
| Spry1    | sprouty homolog 1 (Drosophila)                               | 0.72 | 0.00453 Mm.86483  |
| Ogn      | osteoglycin                                                  | 0.54 | 0.00463 Mm.4258   |
| Ddc      | dopa decarboxylase                                           | 0.69 | 0.00464 Mm.12906  |
| Galc     | galactosylceramidase                                         | 1.25 | 0.00464 Mm.5120   |
| Serping1 | serine (or cysteine) proteinase inhibitor, clade G, member 1 | 1.37 | 0.00464 Mm.38888  |
| Map3k7   | mitogen activated protein kinase kinase kinase 7             | 1.45 | 0.00464 Mm.258589 |
| Apg7l    | autophagy 7-like (S. cerevisiae)                             | 1.30 | 0.00466 Mm.275332 |
| Manba    | mannosidase, beta A, lysosomal                               | 1.43 | 0.00469 Mm.280536 |
| Ace2     | angiotensin I converting enzyme (peptidyl-dipeptidase A) 2   | 0.68 | 0.00471 Mm.13451  |
| Tnfrsf14 | tumor necrosis factor receptor superfamily, member 14 (he    | 0.70 | 0.00471 Mm.215147 |
| Gstm2    | glutathione S-transferase, mu 2                              | 0.71 | 0.00471 Mm.272792 |
| Ptprb    | protein tyrosine phosphatase, receptor type, B               | 0.77 | 0.00471 Mm.37213  |
| Areg     | amphiregulin                                                 | 1.68 | 0.00478 Mm.8039   |
| Hpgd     | hydroxyprostaglandin dehydrogenase 15 (NAD)                  | 0.62 | 0.00481 Mm.18832  |
| Mkrn1    | makorin, ring finger protein, 1                              | 0.67 | 0.00481 Mm.83241  |
| Npr1     | natriuretic peptide receptor 1                               | 0.71 | 0.00483 Mm.4627   |
| Lepre1   | leprecan 1                                                   | 1.24 | 0.00486 Mm.27961  |
| Smarce1  | SWI/SNF related, matrix associated, actin dependent regul:   | 0.68 | 0.00488 Mm.27330  |
| Zfp467   | zinc finger protein 467                                      | 0.73 | 0.00488 Mm.301341 |
| Slamf9   | SLAM family member 9                                         | 1.36 | 0.0049 Mm.150050  |
| Prdc     | protein related to DAN and cerberus                          | 0.63 | 0.00492 Mm.25760  |
| Nutf2    | nuclear transport factor 2                                   | 1.24 | 0.00492 Mm.269188 |
| Cerk     | ceramide kinase                                              | 1.50 | 0.00492 Mm.222685 |
| Arf5     | ADP-ribosylation factor 5                                    | 2.53 | 0.00492 Mm.4996   |

|          |                                                                          |      |                   |
|----------|--------------------------------------------------------------------------|------|-------------------|
| Col15a1  | procollagen, type XV                                                     | 1.35 | 0.00498 Mm.233547 |
| Abca3    | ATP-binding cassette, sub-family A (ABC1), member 3                      | 0.60 | 0.00502 Mm.239470 |
| Spna1    | spectrin alpha 1                                                         | 0.69 | 0.00502 Mm.200611 |
| Pbx2     | pre B-cell leukemia transcription factor 2                               | 0.73 | 0.00502 Mm.7103   |
| Rgs9     | regulator of G-protein signaling 9                                       | 0.80 | 0.00505 Mm.38548  |
| Taz      | tafazzin                                                                 | 0.77 | 0.00512 Mm.268483 |
| Tmem2    | transmembrane protein 2                                                  | 0.57 | 0.00513 Mm.258163 |
| Rfxank   | regulatory factor X-associated ankyrin-containing protein                | 0.76 | 0.00513 Mm.298302 |
| Git2     | G protein-coupled receptor kinase-interactor 2                           | 0.77 | 0.00513 Mm.195632 |
| Egfl7    | EGF-like domain 7                                                        | 0.75 | 0.00517 Mm.268933 |
| Gtf3a    | general transcription factor III A                                       | 1.32 | 0.00523 Mm.29105  |
| Myo1b    | myosin IB                                                                | 0.65 | 0.00524 Mm.3390   |
| Wfs1     | Wolfram syndrome 1 homolog (human)                                       | 1.22 | 0.00524 Mm.20916  |
| Atp1b1   | ATPase, Na <sup>+</sup> /K <sup>+</sup> transporting, beta 1 polypeptide | 1.39 | 0.00524 Mm.4550   |
| Pla1a    | phospholipase A1 member A                                                | 2.43 | 0.00525 Mm.279805 |
| Cnk      | cytokine inducible kinase                                                | 1.31 | 0.00526 Mm.269772 |
| Sbno1    | sno, strawberry notch homolog 1 (Drosophila)                             | 1.39 | 0.00529 Mm.23879  |
| Tie1     | tyrosine kinase receptor 1                                               | 0.57 | 0.00541 Mm.4345   |
| Sox18    | SRY-box containing gene 18                                               | 0.65 | 0.00544 Mm.264904 |
| Pmvk     | phosphomevalonate kinase                                                 | 1.42 | 0.00545 Mm.34242  |
| Fjx1     | four jointed box 1 (Drosophila)                                          | 1.54 | 0.00545 Mm.29730  |
| Cryz     | crystallin, zeta                                                         | 0.67 | 0.00551 Mm.235152 |
| Serpinh1 | serine (or cysteine) proteinase inhibitor, clade H, member 1             | 1.60 | 0.00551 Mm.22708  |
| Tm4sf8   | transmembrane 4 superfamily member 8                                     | 1.27 | 0.00552 Mm.28484  |
| Aig1     | androgen-induced 1                                                       | 0.77 | 0.00559 Mm.45755  |
| Fgfr1    | fibroblast growth factor receptor 1                                      | 1.48 | 0.0056 Mm.265716  |
| Tnk1     | tyrosine kinase, non-receptor, 1                                         | 0.75 | 0.00562 Mm.275935 |
| Spop     | speckle-type POZ protein                                                 | 1.41 | 0.0057 Mm.285454  |
| Ephx1    | epoxide hydrolase 1, microsomal                                          | 0.64 | 0.00581 Mm.9075   |
| Cldn4    | claudin 4                                                                | 2.00 | 0.00583 Mm.7339   |
| Pdgfc    | platelet-derived growth factor, C polypeptide                            | 2.10 | 0.00584 Mm.40268  |
| Hs6st1   | heparan sulfate 6-O-sulfotransferase 1                                   | 1.31 | 0.00591 Mm.27195  |
| Syng1    | synaptogyrin 1                                                           | 1.41 | 0.00591 Mm.230301 |
| Desrt    | developmentally and sexually retarded with transient immu                | 1.59 | 0.00591 Mm.270346 |
| Pgam2    | phosphoglycerate mutase 2                                                | 0.76 | 0.00596 Mm.219627 |
| Ctps     | cytidine 5'-triphosphate synthase                                        | 1.47 | 0.00597 Mm.1815   |
| Pscd3    | pleckstrin homology, Sec7 and coiled-coil domains 3                      | 0.70 | 0.00604 Mm.281003 |

|        |                                                               |      |                   |
|--------|---------------------------------------------------------------|------|-------------------|
| Tes    | testis derived transcript                                     | 1.40 | 0.00604 Mm.279920 |
| Soat1  | sterol O-acyltransferase 1                                    | 2.46 | 0.00604 Mm.28099  |
| Idb2   | inhibitor of DNA binding 2                                    | 1.25 | 0.00606 Mm.34871  |
| Stk10  | serine/threonine kinase 10                                    | 0.74 | 0.00616 Mm.8235   |
| Nup210 | nucleoporin 210                                               | 0.61 | 0.00619 Mm.28162  |
| Nsf    | N-ethylmaleimide sensitive fusion protein                     | 1.31 | 0.00619 Mm.69960  |
| Cldn5  | claudin 5                                                     | 0.67 | 0.00623 Mm.22768  |
| Ccr1   | chemokine (C-C motif) receptor 1                              | 1.90 | 0.00626 Mm.274927 |
| Idb4   | inhibitor of DNA binding 4                                    | 0.56 | 0.00627 Mm.283273 |
| Gapd   | glyceraldehyde-3-phosphate dehydrogenase                      | 1.28 | 0.00631 Mm.5289   |
| Ckmt2  | creatine kinase, mitochondrial 2                              | 0.62 | 0.00633 Mm.20240  |
| Homer3 | homer homolog 3 (Drosophila)                                  | 0.81 | 0.00635 Mm.10022  |
| Cd2    | CD2 antigen                                                   | 0.62 | 0.00638 Mm.22842  |
| Sprr1a | small proline-rich protein 1A                                 | 2.27 | 0.00638 Mm.625    |
| Mal    | myelin and lymphocyte protein, T-cell differentiation protein | 1.79 | 0.00641 Mm.39040  |
| Fbln5  | fibulin 5                                                     | 0.75 | 0.00643 Mm.288381 |
| Cyp51  | cytochrome P450, 51                                           | 1.44 | 0.00643 Mm.140158 |
| Fcrl3  | Fc receptor-like 3                                            | 1.32 | 0.00651 Mm.251254 |
| Plce1  | phospholipase C, epsilon 1                                    | 0.60 | 0.00658 Mm.34031  |
| Man2b1 | mannosidase 2, alpha B1                                       | 1.35 | 0.00658 Mm.4219   |
| Cri1   | CREBBP/EP300 inhibitory protein 1                             | 1.58 | 0.00658 Mm.44244  |
| Bat5   | HLA-B associated transcript 5                                 | 1.35 | 0.00664 Mm.43745  |
| Pgd    | phosphogluconate dehydrogenase                                | 1.32 | 0.00667 Mm.252080 |
| Orc6l  | origin recognition complex, subunit 6-like (S. cerevisiae)    | 1.27 | 0.0067 Mm.29709   |
| Smo    | smoothened homolog (Drosophila)                               | 0.75 | 0.00671 Mm.29279  |
| Socs4  | suppressor of cytokine signaling 4                            | 1.23 | 0.00672 Mm.91920  |
| Dhx40  | DEAH (Asp-Glu-Ala-His) box polypeptide 40                     | 1.35 | 0.00672 Mm.260627 |
| Mrpl49 | mitochondrial ribosomal protein L49                           | 0.80 | 0.00675 Mm.181290 |
| Cldn2  | claudin 2                                                     | 1.61 | 0.00678 Mm.117068 |
| Maff   | v-maf musculoaponeurotic fibrosarcoma oncogene family, 1      | 1.52 | 0.00679 Mm.86646  |
| Pps    | putative phosphatase                                          | 0.72 | 0.00686 Mm.1458   |
| Mrpl15 | mitochondrial ribosomal protein L15                           | 1.26 | 0.00686 Mm.182927 |
| Aass   | aminoadipate-semialdehyde synthase                            | 0.70 | 0.0069 Mm.18651   |
| Pltp   | phospholipid transfer protein                                 | 0.60 | 0.00694 Mm.6105   |
| Arfrp1 | ADP-ribosylation factor related protein 1                     | 0.72 | 0.00694 Mm.87720  |
| Tcf21  | transcription factor 21                                       | 0.49 | 0.00699 Mm.16497  |
| Wtap   | Wilms' tumour 1-associating protein                           | 0.75 | 0.00699 Mm.275521 |

|          |                                                                           |      |                   |
|----------|---------------------------------------------------------------------------|------|-------------------|
| Ak1      | adenylate kinase 1                                                        | 1.31 | 0.00699 Mm.29189  |
| Eps8     | epidermal growth factor receptor pathway substrate 8                      | 1.26 | 0.00706 Mm.235346 |
| Syt14    | synaptotagmin-like 4                                                      | 0.74 | 0.00716 Mm.38674  |
| Fancl    | Fanconi anemia, complementation group L                                   | 0.82 | 0.00716 Mm.18875  |
| Ap3s1    | adaptor-related protein complex 3, sigma 1 subunit                        | 1.20 | 0.00716 Mm.27171  |
| Myo5a    | myosin Va                                                                 | 1.74 | 0.00718 Mm.200292 |
| Ankrd1   | ankyrin repeat domain 1 (cardiac muscle)                                  | 0.67 | 0.00723 Mm.10279  |
| Mtmr9    | myotubularin related protein 9                                            | 0.72 | 0.00725 Mm.259107 |
| Pkm2     | pyruvate kinase, muscle                                                   | 1.36 | 0.00726 Mm.151203 |
| Ppp1r14a | protein phosphatase 1, regulatory (inhibitor) subunit 14A                 | 0.61 | 0.00744 Mm.2343   |
| Mme      | membrane metallo endopeptidase                                            | 0.53 | 0.00752 Mm.296022 |
| Ly86     | lymphocyte antigen 86                                                     | 1.75 | 0.00752 Mm.2639   |
| Cdc42    | cell division cycle 42 homolog ( <i>S. cerevisiae</i> )                   | 1.28 | 0.00753 Mm.1022   |
| Bcl2l2   | Bcl2-like 2                                                               | 0.70 | 0.00767 Mm.6967   |
| Epb4.111 | erythrocyte protein band 4.1-like 1                                       | 0.78 | 0.00768 Mm.20852  |
| Adh7     | alcohol dehydrogenase 7 (class IV), mu or sigma polypeptide               | 1.43 | 0.00768 Mm.8473   |
| Il18     | interleukin 18                                                            | 0.60 | 0.00773 Mm.1410   |
| Ech1     | enoyl coenzyme A hydratase 1, peroxisomal                                 | 0.64 | 0.00773 Mm.2112   |
| Hyal2    | hyaluronidase 2                                                           | 0.80 | 0.00773 Mm.4834   |
| Car11    | carbonic anhydrase 11                                                     | 0.82 | 0.00773 Mm.298093 |
| Mt2      | metallothionein 2                                                         | 4.14 | 0.00773 Mm.147226 |
| Gaa      | glucosidase, alpha, acid                                                  | 1.30 | 0.00774 Mm.4793   |
| Fstl3    | follicle-stimulating-like 3                                               | 1.45 | 0.00774 Mm.251710 |
| Fscn1    | fascin homolog 1, actin bundling protein (Strongylocentrotus purpuraceus) | 1.86 | 0.00778 Mm.289707 |
| Stard3   | START domain containing 3                                                 | 0.79 | 0.00782 Mm.265546 |
| Alas2    | aminolevulinic acid synthase 2, erythroid                                 | 0.46 | 0.00785 Mm.140509 |
| Pon1     | paraoxonase 1                                                             | 0.50 | 0.00785 Mm.237657 |
| Ugcg     | UDP-glucose ceramide glucosyltransferase                                  | 1.28 | 0.00785 Mm.198803 |
| Cp       | ceruloplasmin                                                             | 1.68 | 0.00786 Mm.13787  |
| Hnrpc    | heterogeneous nuclear ribonucleoprotein C                                 | 0.73 | 0.00788 Mm.274690 |
| Itga9    | integrin alpha 9                                                          | 0.74 | 0.0079 Mm.10010   |
| Hmgcs2   | 3-hydroxy-3-methylglutaryl-Coenzyme A synthase 2                          | 0.77 | 0.0079 Mm.289131  |
| Ptp4a3   | protein tyrosine phosphatase 4a3                                          | 0.79 | 0.0079 Mm.153891  |
| Sema7a   | sema domain, immunoglobulin domain (Ig), and GPI member 7A                | 1.48 | 0.00792 Mm.288845 |
| Bmx      | BMX non-receptor tyrosine kinase                                          | 0.66 | 0.00793 Mm.504    |
| Tmc4     | transmembrane channel-like gene family 4                                  | 1.37 | 0.00793 Mm.195872 |
| Cfh      | complement component factor h                                             | 1.45 | 0.00795 Mm.8655   |



|           |                                                        |      |                   |
|-----------|--------------------------------------------------------|------|-------------------|
| Tpcn1     | two pore channel 1                                     | 0.79 | 0.00796 Mm.114054 |
| Me2       | malic enzyme 2, NAD(+)-dependent, mitochondrial        | 0.80 | 0.00798 Mm.36817  |
| Cyp7b1    | cytochrome P450, family 7, subfamily b, polypeptide 1  | 1.67 | 0.00799 Mm.278588 |
| Plvap     | plasmalemma vesicle associated protein                 | 0.62 | 0.00806 Mm.34112  |
| Bgn       | biglycan                                               | 1.21 | 0.00809 Mm.2608   |
| Amph      | amphiphysin                                            | 0.67 | 0.00817 Mm.101650 |
| Gucy1b3   | guanylate cyclase 1, soluble, beta 3                   | 1.59 | 0.00817 Mm.9445   |
| Fbp1      | fructose bisphosphatase 1                              | 0.72 | 0.00818 Mm.246512 |
| Map3k1    | mitogen activated protein kinase kinase kinase 1       | 1.29 | 0.00818 Mm.15918  |
| Aspa      | aspartoacylase (aminoacylase) 2                        | 0.78 | 0.0082 Mm.293574  |
| Wdr1      | WD repeat domain 1                                     | 1.20 | 0.0082 Mm.2654    |
| Ccl17     | chemokine (C-C motif) ligand 17                        | 1.82 | 0.00821 Mm.41988  |
| Stard8    | START domain containing 8                              | 0.78 | 0.00823 Mm.236928 |
| Hist1h2bc | histone 1, H2bc                                        | 1.41 | 0.00823 Mm.261676 |
| Dab2ip    | disabled homolog 2 (Drosophila) interacting protein    | 0.78 | 0.0083 Mm.29629   |
| Lif       | leukemia inhibitory factor                             | 1.48 | 0.00833 Mm.4964   |
| Polg      | polymerase (DNA directed), gamma                       | 0.74 | 0.00839 Mm.3616   |
| Ian1      | immune associated nucleotide 1                         | 0.55 | 0.00848 Mm.262146 |
| Slc38a2   | solute carrier family 38, member 2                     | 1.47 | 0.00857 Mm.46754  |
| Cstb      | cystatin B                                             | 1.33 | 0.00859 Mm.6095   |
| Anxa4     | annexin A4                                             | 0.74 | 0.00869 Mm.259702 |
| Tm4sf11   | transmembrane 4 superfamily member 11                  | 0.74 | 0.00871 Mm.281557 |
| S100a4    | S100 calcium binding protein A4                        | 2.11 | 0.00876 Mm.3925   |
| Vps4a     | vacuolar protein sorting 4a (yeast)                    | 0.73 | 0.00878 Mm.236004 |
| Cspg2     | chondroitin sulfate proteoglycan 2                     | 1.95 | 0.00878 Mm.158700 |
| Hhex      | hematopoietically expressed homeobox                   | 0.79 | 0.00879 Mm.33896  |
| Gsta2     | glutathione S-transferase, alpha 2 (Yc2)               | 0.58 | 0.00882 Mm.197422 |
| Selp      | selectin, platelet                                     | 1.33 | 0.00882 Mm.248316 |
| Wnt2      | wingless-related MMTV integration site 2               | 0.66 | 0.0089 Mm.33653   |
| Cln8      | ceroid-lipofuscinosis, neuronal 8                      | 0.72 | 0.0089 Mm.132532  |
| Gnpnat1   | glucosamine-phosphate N-acetyltransferase 1            | 1.28 | 0.0089 Mm.233534  |
| Tjp2      | tight junction protein 2                               | 0.61 | 0.00891 Mm.104744 |
| Fxyd1     | FXYP domain-containing ion transport regulator 1       | 0.69 | 0.00891 Mm.1491   |
| Rgs19     | regulator of G-protein signaling 19                    | 1.36 | 0.00891 Mm.274366 |
| Aox1      | aldehyde oxidase 1                                     | 0.64 | 0.00896 Mm.26787  |
| Cd24a     | CD24a antigen                                          | 1.45 | 0.00896 Mm.6417   |
| Cyp39a1   | cytochrome P450, family 39, subfamily a, polypeptide 1 | 0.74 | 0.00898 Mm.17991  |

|          |                                                                |      |                   |
|----------|----------------------------------------------------------------|------|-------------------|
| Cyp2j9   | cytochrome P450, family 2, subfamily j, polypeptide 9          | 0.82 | 0.00898 Mm.87271  |
|          | 38235 septin 5                                                 | 1.44 | 0.00902 Mm.29976  |
| Slc2a1   | solute carrier family 2 (facilitated glucose transporter), mem | 1.44 | 0.00902 Mm.21002  |
| Gba2     | glucosidase beta 2                                             | 0.73 | 0.00903 Mm.229444 |
| Cdh5     | cadherin 5                                                     | 0.64 | 0.00909 Mm.21767  |
| Fabp1    | fatty acid binding protein 1, liver                            | 0.51 | 0.00913 Mm.22126  |
| Krt2-8   | keratin complex 2, basic, gene 8                               | 0.66 | 0.00918 Mm.289759 |
| L1cam    | L1 cell adhesion molecule                                      | 0.77 | 0.00923 Mm.260568 |
| Cktsf1b1 | cysteine knot superfamily 1, BMP antagonist 1                  | 1.29 | 0.00923 Mm.166318 |
| Baiap1   | BAI1-associated protein 1                                      | 0.82 | 0.00924 Mm.285284 |
| Slc37a3  | solute carrier family 37 (glycerol-3-phosphate transporter), i | 0.80 | 0.00927 Mm.277527 |
| Plod1    | procollagen-lysine, 2-oxoglutarate 5-dioxygenase 1             | 1.30 | 0.00937 Mm.37371  |
| Agpt2    | angiopoietin 2                                                 | 0.72 | 0.00947 Mm.3425   |
| Pacs1    | phosphofurin acidic cluster sorting protein 1                  | 0.80 | 0.00948 Mm.31392  |
| Tbc1d1   | TBC1 domain family, member 1                                   | 1.31 | 0.00948 Mm.286353 |
| Slc35a1  | solute carrier family 35 (CMP-sialic acid transporter), memt   | 0.67 | 0.00954 Mm.281885 |
| Dgat2    | diacylglycerol O-acyltransferase 2                             | 0.74 | 0.00955 Mm.180189 |
| Mtf2     | metal response element binding transcription factor 2          | 1.31 | 0.00955 Mm.10563  |
| St5      | suppression of tumorigenicity 5                                | 0.75 | 0.00957 Mm.252009 |
| Pdk3     | pyruvate dehydrogenase kinase, isoenzyme 3                     | 1.29 | 0.00959 Mm.12775  |
| Myo6     | myosin VI                                                      | 0.68 | 0.00961 Mm.4040   |
| Fgfr2    | fibroblast growth factor receptor 2                            | 0.68 | 0.00965 Mm.16340  |
| Sycp3    | synaptonemal complex protein 3                                 | 0.61 | 0.00966 Mm.297977 |
| Nr3c1    | nuclear receptor subfamily 3, group C, member 1                | 0.78 | 0.0097 Mm.129481  |
| Phxr5    | per-hexamer repeat gene 5                                      | 0.52 | 0.00971 Mm.40447  |
| Slfn8    | schlafen 8                                                     | 1.77 | 0.00971 Mm.270253 |
| Glx2     | glutaredoxin 2 (thioltransferase)                              | 0.81 | 0.00978 Mm.272727 |
| Bcl3     | B-cell leukemia/lymphoma 3                                     | 1.39 | 0.00978 Mm.1068   |
| Cyp4v3   | cytochrome P450, family 4, subfamily v, polypeptide 3          | 0.72 | 0.0098 Mm.245297  |
| Cdc42ep3 | CDC42 effector protein (Rho GTPase binding) 3                  | 0.75 | 0.0098 Mm.275926  |
| Cebpb    | CCAAT/enhancer binding protein (C/EBP), beta                   | 1.34 | 0.00981 Mm.4863   |
| Akp2     | alkaline phosphatase 2, liver                                  | 0.60 | 0.00984 Mm.288186 |
| Cox8b    | cytochrome c oxidase, subunit VIIIb                            | 0.67 | 0.00984 Mm.3841   |
| Ecm1     | extracellular matrix protein 1                                 | 1.66 | 0.00986 Mm.3433   |
| H19      | H19 fetal liver mRNA                                           | 0.44 | 0.00991 Mm.14802  |
| Gak      | cyclin G associated kinase                                     | 0.82 | 0.00993 Mm.27921  |
| Pcm1     | pericentriolar material 1                                      | 0.77 | 0.0101 Mm.117896  |

|          |                                                                 |      |                  |
|----------|-----------------------------------------------------------------|------|------------------|
| Mmp2     | matrix metalloproteinase 2                                      | 1.44 | 0.0101 Mm.29564  |
| Ntn4     | netrin 4                                                        | 0.66 | 0.0103 Mm.59574  |
| Dcbl1    | discoidin, CUB and LCCL domain containing 1                     | 0.80 | 0.0103 Mm.62982  |
| Cd86     | CD86 antigen                                                    | 1.21 | 0.0103 Mm.1452   |
| Gja4     | gap junction membrane channel protein alpha 4                   | 0.63 | 0.0104 Mm.24615  |
| Rgs3     | regulator of G-protein signaling 3                              | 0.76 | 0.0104 Mm.286753 |
| Spic     | Spi-C transcription factor (Spi-1/PU.1 related)                 | 0.83 | 0.0104 Mm.21642  |
| Fabp3    | fatty acid binding protein 3, muscle and heart                  | 0.58 | 0.0105 Mm.22220  |
| Nrgn     | neurogranin                                                     | 0.60 | 0.0105 Mm.29857  |
| Cspg4    | chondroitin sulfate proteoglycan 4                              | 1.36 | 0.0105 Mm.41329  |
| Zfp102   | zinc finger protein, multitype 2                                | 1.34 | 0.0106 Mm.39496  |
| Hist1h1c | histone 1, H1c                                                  | 1.44 | 0.0106 Mm.193539 |
| Ccl8     | chemokine (C-C motif) ligand 8                                  | 2.07 | 0.0106 Mm.42029  |
| Fgf1     | fibroblast growth factor 1                                      | 0.62 | 0.0108 Mm.241282 |
| Neo1     | neogenin                                                        | 0.72 | 0.0108 Mm.42249  |
| Lrat     | lecithin-retinol acyltransferase (phosphatidylcholine-retinol-) | 0.50 | 0.0109 Mm.33921  |
| Calm3    | calmodulin 3                                                    | 0.75 | 0.0109 Mm.288630 |
| Tde1     | tumor differentially expressed 1                                | 1.23 | 0.0109 Mm.4962   |
| Hfe      | hemochromatosis                                                 | 1.24 | 0.0109 Mm.2681   |
| Surf4    | surfeit gene 4                                                  | 1.38 | 0.0109 Mm.196863 |
| Hs2st1   | heparan sulfate 2-O-sulfotransferase 1                          | 0.70 | 0.011 Mm.12863   |
| Zfp101   | zinc finger protein 101                                         | 0.74 | 0.011 Mm.4417    |
| Apbb3    | amyloid beta (A4) precursor protein-binding, family B, mem      | 0.81 | 0.011 Mm.89673   |
| Tex11    | testis expressed gene 11                                        | 0.82 | 0.011 Mm.134024  |
| Cml1     | camello-like 1                                                  | 0.84 | 0.011 Mm.13036   |
| Asph     | aspartate-beta-hydroxylase                                      | 1.29 | 0.011 Mm.239247  |
| Tnfsf10  | tumor necrosis factor (ligand) superfamily, member 10           | 0.55 | 0.0111 Mm.1062   |
| Arhgef3  | Rho guanine nucleotide exchange factor (GEF) 3                  | 0.73 | 0.0111 Mm.207446 |
| Nr1d1    | nuclear receptor subfamily 1, group D, member 1                 | 0.55 | 0.0112 Mm.193097 |
| Cox6a2   | cytochrome c oxidase, subunit VI a, polypeptide 2               | 0.74 | 0.0112 Mm.43824  |
| Aif1     | allograft inflammatory factor 1                                 | 1.56 | 0.0112 Mm.10747  |
| Acp1     | acid phosphatase 1, soluble                                     | 1.24 | 0.0113 Mm.171337 |
| Whsc2    | Wolf-Hirschhorn syndrome candidate 2 (human)                    | 1.30 | 0.0113 Mm.71361  |
| Cntn1    | contactin 1                                                     | 0.75 | 0.0114 Mm.4911   |
| Edg2     | endothelial differentiation, lysophosphatidic acid G-protein-   | 1.73 | 0.0114 Mm.4772   |
| Mesdc1   | mesoderm development candidate 1                                | 0.75 | 0.0115 Mm.272998 |
| MGC25972 | similar to cytochrome P450, 4a10                                | 0.78 | 0.0115 Mm.276106 |

|           |                                                         |      |                  |
|-----------|---------------------------------------------------------|------|------------------|
| Cox7a1    | cytochrome c oxidase, subunit VIIa 1                    | 0.70 | 0.0116 Mm.12907  |
| Zfp61     | zinc finger protein 61                                  | 0.78 | 0.0117 Mm.12832  |
| Zfp62     | KRAB-zinc finger protein 62                             | 0.78 | 0.0118 Mm.295906 |
| Pcdhb17   | protocadherin beta 17                                   | 1.26 | 0.0118 Mm.87553  |
| Bag3      | Bcl2-associated athanogene 3                            | 1.28 | 0.0118 Mm.84073  |
| Cpxm1     | carboxypeptidase X 1 (M14 family)                       | 1.49 | 0.0118 Mm.149442 |
| H2-Ea     | histocompatibility 2, class II antigen E alpha          | 0.63 | 0.0119 Mm.15680  |
| Siglec5   | sialic acid binding Ig-like lectin 5                    | 0.67 | 0.0119 Mm.290569 |
| Notch1    | Notch gene homolog 1 (Drosophila)                       | 0.77 | 0.0119 Mm.290610 |
| Nubp1     | nucleotide binding protein 1                            | 1.32 | 0.0119 Mm.248934 |
| Cyb5      | cytochrome b-5                                          | 0.75 | 0.012 Mm.31018   |
| Pmp22     | peripheral myelin protein                               | 0.78 | 0.012 Mm.1237    |
| Guk1      | guanylate kinase 1                                      | 0.71 | 0.0121 Mm.3624   |
| Gsn       | gelsolin                                                | 0.71 | 0.0121 Mm.21109  |
| Slc1a1    | solute carrier family 1, member 1                       | 0.75 | 0.0121 Mm.246670 |
| Fhl1      | four and a half LIM domains 1                           | 0.78 | 0.0121 Mm.3126   |
| Il21r     | interleukin 21 receptor                                 | 1.24 | 0.0122 Mm.155643 |
| Plunc     | palate, lung, and nasal epithelium carcinoma associated | 1.89 | 0.0122 Mm.268852 |
| Pcolce2   | procollagen C-endopeptidase enhancer 2                  | 0.47 | 0.0123 Mm.46016  |
| Trim11    | tripartite motif protein 11                             | 0.83 | 0.0123 Mm.248049 |
| Ubc-rs2   | ubiquitin C, related sequence 2                         | 1.20 | 0.0123 Mm.295670 |
| Rab17     | RAB17, member RAS oncogene family                       | 0.75 | 0.0124 Mm.279780 |
| Xrn2      | 5'-3' exoribonuclease 2                                 | 0.81 | 0.0124 Mm.3065   |
| Phka1     | phosphorylase kinase alpha 1                            | 0.82 | 0.0124 Mm.212889 |
| Hexb      | hexosaminidase B                                        | 1.40 | 0.0124 Mm.27816  |
| Madh1     | MAD homolog 1 (Drosophila)                              | 1.41 | 0.0124 Mm.223717 |
| Pde7a     | phosphodiesterase 7A                                    | 1.63 | 0.0124 Mm.244900 |
| Spp1      | secreted phosphoprotein 1                               | 1.75 | 0.0124 Mm.288474 |
| Golph2    | golgi phosphoprotein 2                                  | 1.20 | 0.0125 Mm.171335 |
| Hdlbp     | high density lipoprotein (HDL) binding protein          | 1.27 | 0.0125 Mm.30012  |
| Ogfr      | opioid growth factor receptor                           | 1.33 | 0.0125 Mm.250418 |
| Ptges     | prostaglandin E synthase                                | 1.40 | 0.0125 Mm.28768  |
| Tnfrsf12a | tumor necrosis factor receptor superfamily, member 12a  | 1.80 | 0.0125 Mm.28518  |
| Mt1       | metallothionein 1                                       | 2.83 | 0.0125 Mm.192991 |
| Pla2g6    | phospholipase A2, group VI                              | 0.82 | 0.0126 Mm.155620 |
| Prf1      | perforin 1 (pore forming protein)                       | 0.77 | 0.0127 Mm.240313 |
| Eno1      | enolase 1, alpha non-neuron                             | 1.40 | 0.0127 Mm.70666  |

|          |                                                              |      |                  |
|----------|--------------------------------------------------------------|------|------------------|
| Cdgap    | Cdc42 GTPase-activating protein                              | 0.59 | 0.0128 Mm.268397 |
| Ppap2a   | phosphatidic acid phosphatase 2a                             | 0.68 | 0.0128 Mm.276039 |
| Cyp27a1  | cytochrome P450, family 27, subfamily a, polypeptide 1       | 0.69 | 0.0128 Mm.85083  |
| Spata13  | spermatogenesis associated 13                                | 0.73 | 0.0128 Mm.149776 |
| Dnase1l3 | deoxyribonuclease 1-like 3                                   | 0.76 | 0.0128 Mm.272258 |
| Cav      | caveolin, caveolae protein                                   | 0.77 | 0.0128 Mm.28278  |
| Sema3b   | sema domain, immunoglobulin domain (Ig), short basic don     | 0.79 | 0.0128 Mm.4083   |
| Enah     | enabled homolog (Drosophila)                                 | 1.20 | 0.0128 Mm.87759  |
| Rnf128   | ring finger protein 128                                      | 1.39 | 0.0128 Mm.27764  |
| Dkk3     | dickkopf homolog 3 (Xenopus laevis)                          | 1.47 | 0.0128 Mm.55143  |
| Lox1l    | lysyl oxidase-like 1                                         | 1.49 | 0.0128 Mm.250492 |
| Fpr1     | formyl peptide receptor 1                                    | 0.66 | 0.0131 Mm.56951  |
| Nfkbil1  | nuclear factor of kappa light polypeptide gene enhancer in l | 0.83 | 0.0131 Mm.100226 |
| Thsd1    | thrombospondin, type I, domain 1                             | 0.84 | 0.0131 Mm.32067  |
| Ccnh     | cyclin H                                                     | 1.24 | 0.0131 Mm.18474  |
| Lrp1     | low density lipoprotein receptor-related protein 1           | 1.33 | 0.0132 Mm.271854 |
| Wnt4     | wingless-related MMTV integration site 4                     | 1.35 | 0.0132 Mm.20355  |
| Rgs5     | regulator of G-protein signaling 5                           | 1.39 | 0.0132 Mm.20954  |
| Pcmt1    | protein-L-isoaspartate (D-aspartate) O-methyltransferase 1   | 1.50 | 0.0132 Mm.258431 |
| Igfbp2   | insulin-like growth factor binding protein 2                 | 0.66 | 0.0133 Mm.141936 |
| Akr1c12  | aldo-keto reductase family 1, member C12                     | 1.23 | 0.0133 Mm.89993  |
| Irf5     | interferon regulatory factor 5                               | 1.30 | 0.0133 Mm.6479   |
| Car3     | carbonic anhydrase 3                                         | 0.53 | 0.0134 Mm.300    |
| Pdcd1lg1 | programmed cell death 1 ligand 1                             | 0.74 | 0.0134 Mm.245363 |
| Prim1    | DNA primase, p49 subunit                                     | 0.76 | 0.0134 Mm.2903   |
| Abcb10   | ATP-binding cassette, sub-family B (MDR/TAP), member 10      | 0.80 | 0.0134 Mm.274243 |
| Nit1     | nitrilase 1                                                  | 0.83 | 0.0134 Mm.12915  |
| Dad1     | defender against cell death 1                                | 1.37 | 0.0134 Mm.2547   |
| Il6      | interleukin 6                                                | 1.70 | 0.0134 Mm.1019   |
| Col4a6   | procollagen, type IV, alpha 6                                | 0.81 | 0.0135 Mm.155586 |
| Cbfa2t1h | CBFA2T1 identified gene homolog (human)                      | 0.82 | 0.0135 Mm.4909   |
| Tmem8    | transmembrane protein 8 (five membrane-spanning domair       | 0.76 | 0.0136 Mm.143826 |
| Stard13  | serologically defined colon cancer antigen 13                | 0.77 | 0.0136 Mm.270916 |
| Amotl2   | angiomin like 2                                              | 0.78 | 0.0136 Mm.21145  |
| Ms4a8a   | membrane-spanning 4-domains, subfamily A, member 8A          | 1.31 | 0.0136 Mm.248501 |
| Crlf1    | cytokine receptor-like factor 1                              | 1.33 | 0.0136 Mm.116700 |
| Arhg     | ras homolog gene family, member G                            | 1.38 | 0.0136 Mm.259795 |

|        |                                                                          |      |                  |
|--------|--------------------------------------------------------------------------|------|------------------|
| Heyl   | hairy/enhancer-of-split related with YRPW motif-like                     | 1.44 | 0.0136 Mm.103615 |
| Luc7l2 | LUC7-like 2 ( <i>S. cerevisiae</i> )                                     | 2.50 | 0.0136 Mm.170182 |
| Nova1  | neuro-oncological ventral antigen 1                                      | 0.79 | 0.0138 Mm.247195 |
| Col7a1 | procollagen, type VII, alpha 1                                           | 1.27 | 0.0138 Mm.6200   |
| Bcar3  | breast cancer anti-estrogen resistance 3                                 | 0.75 | 0.0141 Mm.45815  |
| Slc1a3 | solute carrier family 1, member 3                                        | 0.77 | 0.0141 Mm.204834 |
| Meox1  | mesenchyme homeobox 1                                                    | 1.26 | 0.0141 Mm.3404   |
| Gas7   | growth arrest specific 7                                                 | 1.30 | 0.0141 Mm.40338  |
| Col4a1 | procollagen, type IV, alpha 1                                            | 1.32 | 0.0142 Mm.738    |
| Ltbp4  | latent transforming growth factor beta binding protein 4                 | 0.59 | 0.0143 Mm.272251 |
| Cldn8  | claudin 8                                                                | 0.67 | 0.0143 Mm.25836  |
| H2-Q1  | histocompatibility 2, Q region locus 1                                   | 1.29 | 0.0143 Mm.214762 |
| Tm7sf3 | transmembrane 7 superfamily member 3                                     | 0.69 | 0.0144 Mm.173324 |
| Ctdspl | CTD (carboxy-terminal domain, RNA polymerase II, polypeptide)            | 0.72 | 0.0144 Mm.28747  |
| H2-M3  | histocompatibility 2, M region locus 3                                   | 1.28 | 0.0144 Mm.14437  |
| Wbp1   | WW domain binding protein 1                                              | 0.80 | 0.0146 Mm.1109   |
| Nxn    | nucleoredoxin                                                            | 0.83 | 0.0146 Mm.217062 |
| Nmnat  | NMN adenylyltransferase; nicotinamide mononucleotide adenylyltransferase | 0.86 | 0.0146 Mm.76062  |
| Dbn1   | drebrin 1                                                                | 1.28 | 0.0146 Mm.19016  |
| Rassf3 | Ras association (RalGDS/AF-6) domain family 3                            | 0.60 | 0.0147 Mm.41265  |
| Zfp346 | zinc finger protein 346                                                  | 0.74 | 0.0147 Mm.22795  |
| Gpr56  | G protein-coupled receptor 56                                            | 1.30 | 0.0147 Mm.290834 |
| Thbs3  | thrombospondin 3                                                         | 0.52 | 0.0148 Mm.2114   |
| Hnrpdl | heterogeneous nuclear ribonucleoprotein D-like                           | 0.74 | 0.0148 Mm.259113 |
| H2-Ke6 | H2-K region expressed gene 6                                             | 0.80 | 0.0148 Mm.275452 |
| Clstn1 | calsyntenin 1                                                            | 0.68 | 0.0149 Mm.38993  |
| Esrrb1 | estrogen-related receptor beta like 1                                    | 0.78 | 0.0149 Mm.241276 |
| Taf1a  | TATA box binding protein (Tbp)-associated factor, RNA polymerase II      | 0.81 | 0.0149 Mm.39081  |
| Rad23b | RAD23b homolog ( <i>S. cerevisiae</i> )                                  | 1.27 | 0.0149 Mm.196846 |
| Hk2    | hexokinase 2                                                             | 1.33 | 0.0149 Mm.255848 |
| Galnt3 | UDP-N-acetyl-alpha-D-galactosamine:polypeptide N-acetyltransferase 3     | 1.20 | 0.015 Mm.38441   |
| Gng12  | guanine nucleotide binding protein (G protein), gamma 12                 | 1.28 | 0.015 Mm.13080   |
| Sdfr2  | stromal cell derived factor receptor 2                                   | 1.36 | 0.015 Mm.66293   |
| Timp3  | tissue inhibitor of metalloproteinase 3                                  | 0.69 | 0.0151 Mm.132958 |
| Bambi  | BMP and activin membrane-bound inhibitor, homolog (Xenopus)              | 0.71 | 0.0151 Mm.284863 |
| Arpc4  | actin related protein 2/3 complex, subunit 4                             | 1.28 | 0.0151 Mm.289306 |
| Hif1a  | hypoxia inducible factor 1, alpha subunit                                | 1.44 | 0.0151 Mm.3879   |

|          |                                                                |      |                  |
|----------|----------------------------------------------------------------|------|------------------|
| Dnmt2    | DNA methyltransferase 2                                        | 0.76 | 0.0152 Mm.6979   |
| Spna2    | spectrin alpha 2                                               | 0.77 | 0.0152 Mm.295950 |
| Ereg     | epiregulin                                                     | 2.57 | 0.0152 Mm.4791   |
| Myl7     | myosin, light polypeptide 7, regulatory                        | 0.58 | 0.0153 Mm.46514  |
| Epha3    | Eph receptor A3                                                | 1.36 | 0.0153 Mm.1977   |
| Tdo2     | tryptophan 2,3-dioxygenase                                     | 1.41 | 0.0153 Mm.258622 |
| Gpc4     | glypican 4                                                     | 1.41 | 0.0153 Mm.1528   |
| Ptx3     | pentaxin related gene                                          | 1.48 | 0.0153 Mm.276776 |
| Rpl31    | ribosomal protein L31                                          | 1.35 | 0.0154 Mm.285021 |
| Lgals1   | lectin, galactose binding, soluble 1                           | 1.51 | 0.0154 Mm.43831  |
| Enpp1    | ectonucleotide pyrophosphatase/phosphodiesterase 1             | 1.24 | 0.0156 Mm.27254  |
| Eif3s10  | eukaryotic translation initiation factor 3, subunit 10 (theta) | 1.31 | 0.0157 Mm.259617 |
| Pcx      | pyruvate carboxylase                                           | 1.27 | 0.0158 Mm.1845   |
| Grn      | granulin                                                       | 1.24 | 0.0159 Mm.238941 |
| Ndufb8   | NADH dehydrogenase (ubiquinone) 1 beta subcomplex 8            | 1.30 | 0.0159 Mm.2060   |
| Rps6     | ribosomal protein S6                                           | 1.39 | 0.0159 Mm.292504 |
| Leprotl1 | leptin receptor overlapping transcript-like 1                  | 1.22 | 0.016 Mm.34212   |
| Acta2    | actin, alpha 2, smooth muscle, aorta                           | 1.39 | 0.016 Mm.213025  |
| F3       | coagulation factor III                                         | 1.80 | 0.016 Mm.273188  |
| Parg     | poly (ADP-ribose) glycohydrolase                               | 1.19 | 0.0162 Mm.15962  |
| Tpm1     | tropomyosin 1, alpha                                           | 1.21 | 0.0162 Mm.121878 |
| Pigf     | phosphatidylinositol glycan, class F                           | 0.77 | 0.0163 Mm.219685 |
| Zdhhc14  | zinc finger, DHHC domain containing 14                         | 0.78 | 0.0163 Mm.268326 |
| Edem1    | ER degradation enhancer, mannosidase alpha-like 1              | 1.21 | 0.0163 Mm.21596  |
| Rnf141   | ring finger protein 141                                        | 0.75 | 0.0164 Mm.268926 |
| Tgfb1i4  | transforming growth factor beta 1 induced transcript 4         | 0.80 | 0.0164 Mm.20927  |
| Plxnd1   | plexin D1                                                      | 0.69 | 0.0165 Mm.290923 |
| Rassf2   | Ras association (RalGDS/AF-6) domain family 2                  | 0.77 | 0.0165 Mm.204737 |
| Hps3     | Hermansky-Pudlak syndrome 3 homolog (human)                    | 0.79 | 0.0165 Mm.291533 |
| Jam2     | junction adhesion molecule 2                                   | 1.31 | 0.0165 Mm.41758  |
| Rgs6     | regulator of G-protein signaling 6                             | 0.79 | 0.0166 Mm.153013 |
| C5r1     | complement component 5, receptor 1                             | 1.43 | 0.0166 Mm.137488 |
| Hspa1a   | heat shock protein 1A                                          | 1.54 | 0.0166 Mm.275405 |
| Tek      | endothelial-specific receptor tyrosine kinase                  | 0.69 | 0.0167 Mm.14313  |
| Cyp2f2   | cytochrome P450, family 2, subfamily f, polypeptide 2          | 0.69 | 0.0168 Mm.298104 |
| Aldh2    | aldehyde dehydrogenase 2, mitochondrial                        | 0.76 | 0.0168 Mm.284446 |
| Cdv3     | carnitine deficiency-associated gene expressed in ventricle    | 1.24 | 0.0168 Mm.167827 |

|         |                                                            |      |                  |
|---------|------------------------------------------------------------|------|------------------|
| Ptpn1   | protein tyrosine phosphatase, non-receptor type 1          | 1.29 | 0.0168 Mm.277916 |
| Rasgrp2 | RAS, guanyl releasing protein 2                            | 0.81 | 0.0169 Mm.77017  |
| Ndr1    | N-myc downstream regulated 1                               | 1.19 | 0.0169 Mm.30837  |
| Ube2g2  | ubiquitin-conjugating enzyme E2G 2                         | 1.42 | 0.0169 Mm.29352  |
| Rbm6    | RNA binding motif protein 6                                | 0.84 | 0.017 Mm.139926  |
| Pim1    | proviral integration site 1                                | 1.75 | 0.017 Mm.269678  |
| Dnajc3  | DnaJ (Hsp40) homolog, subfamily C, member 3                | 1.39 | 0.0171 Mm.12616  |
| Clecsf5 | C-type (calcium dependent, carbohydrate-recognition dom    | 1.44 | 0.0171 Mm.103765 |
| Nup50   | nucleoporin 50                                             | 1.29 | 0.0172 Mm.28379  |
| Sqrdl   | sulfide quinone reductase-like (yeast)                     | 0.76 | 0.0173 Mm.28986  |
| Pirb    | paired-Ig-like receptor B                                  | 1.43 | 0.0173 Mm.3189   |
| Stxbp1  | syntaxin binding protein 1                                 | 0.74 | 0.0174 Mm.278865 |
| Trem3   | triggering receptor expressed on myeloid cells 3           | 0.76 | 0.0174 Mm.117124 |
| Sipa1   | signal-induced proliferation associated gene 1             | 0.78 | 0.0174 Mm.3072   |
| Lama5   | laminin, alpha 5                                           | 1.22 | 0.0174 Mm.4339   |
| H13     | histocompatibility 13                                      | 1.27 | 0.0174 Mm.277327 |
| Capg    | capping protein (actin filament), gelsolin-like            | 1.42 | 0.0174 Mm.18626  |
| Ddr2    | discoidin domain receptor family, member 2                 | 1.55 | 0.0174 Mm.4999   |
| Ptprm   | protein tyrosine phosphatase, receptor type, M             | 0.66 | 0.0175 Mm.243935 |
| Uble1a  | ubiquitin-like 1 (sentrin) activating enzyme E1A           | 0.78 | 0.0175 Mm.258530 |
| Sec61a1 | Sec61 alpha 1 subunit (S. cerevisiae)                      | 1.27 | 0.0175 Mm.28375  |
| Ifi203  | interferon activated gene 203                              | 0.60 | 0.0176 Mm.277332 |
| Gstt1   | glutathione S-transferase, theta 1                         | 0.65 | 0.0176 Mm.2746   |
| Capn3   | calpain 3                                                  | 0.78 | 0.0176 Mm.20863  |
| Myo18a  | myosin XVIIIa                                              | 0.82 | 0.0176 Mm.250799 |
| Scamp2  | secretory carrier membrane protein 2                       | 1.21 | 0.0176 Mm.295392 |
| Steap   | six transmembrane epithelial antigen of the prostate       | 1.22 | 0.0176 Mm.85429  |
| C1qtnf5 | C1q and tumor necrosis factor related protein 5            | 1.26 | 0.0176 Mm.227110 |
| Rpl13a  | ribosomal protein L13a                                     | 1.26 | 0.0176 Mm.180458 |
| Msr1    | macrophage scavenger receptor 1                            | 1.40 | 0.0176 Mm.239291 |
| Otub1   | OTU domain, ubiquitin aldehyde binding 1                   | 1.98 | 0.0176 Mm.203921 |
| Hagh    | hydroxyacyl glutathione hydrolase                          | 0.80 | 0.0178 Mm.44240  |
| Igj     | immunoglobulin joining chain                               | 0.38 | 0.0179 Mm.1192   |
| Dnpep   | aspartyl aminopeptidase                                    | 1.32 | 0.0179 Mm.252390 |
| Kcne4   | potassium voltage-gated channel, Isk-related subfamily, ge | 1.38 | 0.0179 Mm.24386  |
| Rod1    | ROD1 regulator of differentiation 1 (S. pombe)             | 1.43 | 0.0179 Mm.158801 |
| Enc1    | ectodermal-neural cortex 1                                 | 1.47 | 0.018 Mm.241073  |



|          |                                                              |      |                  |
|----------|--------------------------------------------------------------|------|------------------|
| Dgka     | diacylglycerol kinase, alpha                                 | 0.80 | 0.0183 Mm.291235 |
| Ppfia4   | protein tyrosine phosphatase, receptor type, f polypeptide ( | 1.26 | 0.0183 Mm.295105 |
| Ctgf     | connective tissue growth factor                              | 1.52 | 0.0183 Mm.1810   |
| Stxbp6   | syntaxin binding protein 6 (amisyn)                          | 0.76 | 0.0184 Mm.285400 |
| Sgcg     | sarcoglycan, gamma (dystrophin-associated glycoprotein)      | 0.84 | 0.0184 Mm.72173  |
| Sdc4     | syndecan 4                                                   | 1.84 | 0.0185 Mm.3815   |
| Ager     | advanced glycosylation end product-specific receptor         | 0.82 | 0.0186 Mm.3383   |
| Esam1    | endothelial cell-specific adhesion molecule                  | 0.78 | 0.0188 Mm.41751  |
| Fcer2a   | Fc receptor, IgE, low affinity II, alpha polypeptide         | 0.79 | 0.0188 Mm.1233   |
| Mcpt4    | mast cell protease 4                                         | 0.80 | 0.0188 Mm.22693  |
| Map2k6   | mitogen activated protein kinase kinase 6                    | 0.82 | 0.0188 Mm.14487  |
| Pou6f1   | POU domain, class 6, transcription factor 1                  | 0.83 | 0.0188 Mm.28825  |
| Cideb    | cell death-inducing DNA fragmentation factor, alpha subuni   | 0.85 | 0.0188 Mm.10737  |
| Mpp5     | membrane protein, palmitoylated 5 (MAGUK p55 subfamily       | 0.72 | 0.0189 Mm.30561  |
| Nin      | ninein                                                       | 0.75 | 0.0189 Mm.244047 |
| Igsf4    | immunoglobulin superfamily, member 4                         | 0.80 | 0.0189 Mm.275051 |
| Hip2     | huntingtin interacting protein 2                             | 1.22 | 0.0189 Mm.263318 |
| Lrba     | LPS-responsive beige-like anchor                             | 0.79 | 0.019 Mm.239927  |
| Sgpl1    | sphingosine phosphate lyase 1                                | 1.24 | 0.019 Mm.200373  |
| Cklfsf7  | chemokine-like factor super family 7                         | 1.25 | 0.019 Mm.35600   |
| Obrgp    | leptin receptor gene-related protein                         | 1.30 | 0.019 Mm.4756    |
| Ptprg    | protein tyrosine phosphatase, receptor type, G               | 1.35 | 0.019 Mm.228269  |
| Il4ra    | interleukin 4 receptor, alpha                                | 1.36 | 0.019 Mm.233802  |
| Cdh11    | cadherin 11                                                  | 1.43 | 0.019 Mm.1571    |
| H2afz    | H2A histone family, member Z                                 | 1.67 | 0.019 Mm.117541  |
| Psmb9    | proteasome (prosome, macropain) subunit, beta type 9 (lar    | 0.62 | 0.0193 Mm.16251  |
| Slc9a3r2 | solute carrier family 9 (sodium/hydrogen exchanger), isoform | 0.72 | 0.0193 Mm.21587  |
| Zfx1a    | zinc finger homeobox 1a                                      | 0.77 | 0.0193 Mm.3929   |
| Oprs1    | opioid receptor, sigma 1                                     | 1.24 | 0.0193 Mm.22745  |
| Cmkor1   | chemokine orphan receptor 1                                  | 1.49 | 0.0193 Mm.6522   |
| Itpa     | inosine triphosphatase (nucleoside triphosphate pyrophosp    | 1.19 | 0.0194 Mm.21399  |
| Kit      | kit oncogene                                                 | 0.64 | 0.0195 Mm.247073 |
| Dscr6    | Down syndrome critical region homolog 6 (human)              | 0.73 | 0.0195 Mm.42604  |
| Ccndbp1  | cyclin D-type binding-protein 1                              | 0.77 | 0.0195 Mm.7838   |
| Unc5c    | unc-5 homolog C (C. elegans)                                 | 0.83 | 0.0195 Mm.190874 |
| Actr3    | ARP3 actin-related protein 3 homolog (yeast)                 | 1.34 | 0.0195 Mm.183102 |
| Lmod2    | leiomodoin 2 (cardiac)                                       | 0.77 | 0.0196 Mm.250540 |

|           |                                                                                                   |      |                  |
|-----------|---------------------------------------------------------------------------------------------------|------|------------------|
| Pdgfra    | platelet derived growth factor receptor, alpha polypeptide                                        | 1.69 | 0.0196 Mm.221403 |
| S100a11   | S100 calcium binding protein A11 (calizzarin)                                                     | 1.23 | 0.0197 Mm.280038 |
| Myc       | myelocytomatosis oncogene                                                                         | 1.51 | 0.0201 Mm.2444   |
| Casp9     | caspase 9                                                                                         | 0.76 | 0.0202 Mm.88829  |
| Park2     | parkin                                                                                            | 0.80 | 0.0202 Mm.42046  |
| Rps13     | ribosomal protein S13                                                                             | 1.40 | 0.0202 Mm.14798  |
| Pip5k1a   | phosphatidylinositol-4-phosphate 5-kinase, type 1 alpha                                           | 0.84 | 0.0204 Mm.1945   |
| Slc7a4    | solute carrier family 7 (cationic amino acid transporter, y+ s                                    | 0.81 | 0.0205 Mm.254617 |
| Psmd13    | proteasome (prosome, macropain) 26S subunit, non-ATPase                                           | 1.28 | 0.0206 Mm.29760  |
| Cd8b      | CD8 antigen, beta chain                                                                           | 1.28 | 0.0206 Mm.298096 |
| Flt1      | FMS-like tyrosine kinase 1                                                                        | 0.79 | 0.0207 Mm.241483 |
| Thbs2     | thrombospondin 2                                                                                  | 1.27 | 0.0207 Mm.26688  |
| Sod1      | superoxide dismutase 1, soluble                                                                   | 0.63 | 0.0208 Mm.5274   |
| Cdh2      | cadherin 2                                                                                        | 0.80 | 0.0208 Mm.257437 |
| Lamp2     | lysosomal membrane glycoprotein 2                                                                 | 1.63 | 0.0208 Mm.486    |
| Cd151     | CD151 antigen                                                                                     | 0.85 | 0.0209 Mm.30246  |
| Mrp13     | mitochondrial ribosomal protein L3                                                                | 1.35 | 0.021 Mm.29746   |
| Gabarapl1 | gamma-aminobutyric acid (GABA(A)) receptor-associated protein 1                                   | 0.77 | 0.0211 Mm.14638  |
| Ube2i     | ubiquitin-conjugating enzyme E2I                                                                  | 0.85 | 0.0211 Mm.240044 |
| Mb        | myoglobin                                                                                         | 0.50 | 0.0212 Mm.201606 |
| Smarcal1  | Swi/SNF related matrix associated, actin dependent regulator of chromatin 1-like class 1 member A | 0.78 | 0.0212 Mm.274232 |
| Eef1a2    | eukaryotic translation elongation factor 1 alpha 2                                                | 0.84 | 0.0212 Mm.212612 |
| Eif2ak1   | eukaryotic translation initiation factor 2 alpha kinase 1                                         | 1.25 | 0.0212 Mm.298145 |
| Vamp8     | vesicle-associated membrane protein 8                                                             | 1.31 | 0.0212 Mm.1838   |
| Ppicap    | peptidylprolyl isomerase C-associated protein                                                     | 1.36 | 0.0212 Mm.3152   |
| Lepr      | leptin receptor                                                                                   | 0.56 | 0.0213 Mm.259282 |
| Ckm       | creatine kinase, muscle                                                                           | 0.63 | 0.0213 Mm.2375   |
| Dgkz      | diacylglycerol kinase zeta                                                                        | 0.76 | 0.0213 Mm.295226 |
| Zfp1      | zinc finger protein, multitype 1                                                                  | 1.22 | 0.0213 Mm.3105   |
| Phlda1    | pleckstrin homology-like domain, family A, member 1                                               | 1.40 | 0.0213 Mm.3117   |
| Timp2     | tissue inhibitor of metalloproteinase 2                                                           | 1.22 | 0.0214 Mm.206505 |
| Fech      | ferrochelatase                                                                                    | 0.70 | 0.0215 Mm.217130 |
| Alb1      | albumin 1                                                                                         | 0.81 | 0.0215 Mm.16773  |
| Cmah      | cytidine monophospho-N-acetylneuraminic acid hydroxylase                                          | 1.53 | 0.0215 Mm.8396   |
| Hdac11    | histone deacetylase 11                                                                            | 0.71 | 0.0216 Mm.206218 |
| Abcb1a    | ATP-binding cassette, sub-family B (MDR/TAP), member 1                                            | 0.66 | 0.0217 Mm.16086  |
| Tle2      | transducin-like enhancer of split 2, homolog of Drosophila E                                      | 0.66 | 0.0217 Mm.38608  |

|          |                                                               |      |                  |
|----------|---------------------------------------------------------------|------|------------------|
| Lamc2    | laminin, gamma 2                                              | 1.23 | 0.0217 Mm.4717   |
| Mic2l1   | MIC2 (monoclonal Imperial Cancer Research Fund 2)-like 1      | 0.81 | 0.0218 Mm.283879 |
| Cdkn1a   | cyclin-dependent kinase inhibitor 1A (P21)                    | 1.64 | 0.0218 Mm.195663 |
| Gpc1     | glypican 1                                                    | 1.36 | 0.022 Mm.24193   |
| Dctn6    | dynactin 6                                                    | 1.51 | 0.022 Mm.90496   |
| Jmj      | jumonji                                                       | 0.72 | 0.0222 Mm.25059  |
| Dscr5    | Down syndrome critical region homolog 5 (human)               | 0.74 | 0.0222 Mm.39490  |
| Aldh1a1  | aldehyde dehydrogenase family 1, subfamily A1                 | 0.76 | 0.0222 Mm.4514   |
| Zfp261   | zinc finger protein 261                                       | 0.84 | 0.0223 Mm.23458  |
| Mrpl16   | mitochondrial ribosomal protein L16                           | 0.65 | 0.0224 Mm.203928 |
| Pccb     | propionyl Coenzyme A carboxylase, beta polypeptide            | 0.84 | 0.0224 Mm.21079  |
| Chl1     | close homolog of L1                                           | 1.63 | 0.0224 Mm.251288 |
| Prg4     | proteoglycan 4 (megakaryocyte stimulating factor, articular)  | 1.65 | 0.0225 Mm.212696 |
| Camk2g   | calcium/calmodulin -dependent protein kinase II gamma         | 0.80 | 0.0226 Mm.235182 |
| Hrg      | histidine-rich glycoprotein                                   | 1.29 | 0.0226 Mm.2160   |
| Bzrp     | benzodiazepine receptor, peripheral                           | 1.31 | 0.0226 Mm.1508   |
| C1qtnf1  | C1q and tumor necrosis factor related protein 1               | 1.44 | 0.0226 Mm.23845  |
| Fin15    | fibroblast growth factor inducible 15                         | 1.60 | 0.0227 Mm.3421   |
| Angptl4  | angiopoietin-like 4                                           | 1.70 | 0.0227 Mm.196189 |
| Es22     | esterase 22                                                   | 0.80 | 0.0228 Mm.63490  |
| Btg1     | B-cell translocation gene 1, anti-proliferative               | 1.26 | 0.0228 Mm.272183 |
| Ptp4a2   | protein tyrosine phosphatase 4a2                              | 1.36 | 0.0228 Mm.193688 |
| Cbr2     | carbonyl reductase 2                                          | 0.80 | 0.0229 Mm.21454  |
| Gzma     | granzyme A                                                    | 0.45 | 0.023 Mm.15510   |
| Calb3    | calbindin 3, (vitamin D-dependent calcium binding protein)    | 0.67 | 0.023 Mm.6891    |
| Erb2ip   | Erb2 interacting protein                                      | 0.73 | 0.023 Mm.277354  |
| Ezh1     | enhancer of zeste homolog 1 (Drosophila)                      | 0.81 | 0.023 Mm.5027    |
| Itga5    | integrin alpha 5 (fibronectin receptor alpha)                 | 1.62 | 0.023 Mm.16234   |
| Cited2   | Cbp/p300-interacting transactivator, with Glu/Asp-rich carbox | 0.71 | 0.0231 Mm.272321 |
| Stard4   | StAR-related lipid transfer (START) domain containing 4       | 0.76 | 0.0231 Mm.127058 |
| Ccl19    | chemokine (C-C motif) ligand 19                               | 1.22 | 0.0231 Mm.299018 |
| Capzb    | capping protein (actin filament) muscle Z-line, beta          | 1.25 | 0.0231 Mm.2945   |
| Lama1    | laminin, alpha 1                                              | 1.40 | 0.0231 Mm.243    |
| Zfp100   | zinc finger protein 100                                       | 1.23 | 0.0233 Mm.4340   |
| Dcamk1   | double cortin and calcium/calmodulin-dependent protein kinase | 1.26 | 0.0235 Mm.258673 |
| Tnfrsf1b | tumor necrosis factor receptor superfamily, member 1b         | 1.38 | 0.0235 Mm.235328 |
| Adrb1    | adrenergic receptor, beta 1                                   | 0.67 | 0.0237 Mm.46797  |

|          |                                                                |      |                  |
|----------|----------------------------------------------------------------|------|------------------|
| Wif1     | Wnt inhibitory factor 1                                        | 0.82 | 0.0238 Mm.32831  |
| Oaz2     | ornithine decarboxylase antizyme 2                             | 0.79 | 0.0241 Mm.116749 |
| Pvrl2    | poliovirus receptor-related 2                                  | 1.31 | 0.0241 Mm.4341   |
| Marcks   | myristoylated alanine rich protein kinase C substrate          | 1.49 | 0.0241 Mm.30059  |
| Rab3a    | RAB3A, member RAS oncogene family                              | 0.80 | 0.0242 Mm.5083   |
| Vezf1    | vascular endothelial zinc finger 1                             | 0.70 | 0.0243 Mm.46628  |
| Rbpsuh   | recombining binding protein suppressor of hairless (Drosop     | 1.20 | 0.0243 Mm.209292 |
| Grb10    | growth factor receptor bound protein 10                        | 1.30 | 0.0243 Mm.273117 |
| Pik3r4   | phosphatidylinositol 3 kinase, regulatory subunit, polypeptic  | 1.44 | 0.0243 Mm.297473 |
| MGC66590 | Unknown (protein for MGC:66590)                                | 1.46 | 0.0243 Mm.269418 |
| Prdm1    | PR domain containing 1, with ZNF domain                        | 0.73 | 0.0244 Mm.4800   |
| Pelo     | pelota homolog (Drosophila)                                    | 0.80 | 0.0244 Mm.268176 |
| Tnfsf12  | tumor necrosis factor (ligand) superfamily, member 12          | 0.86 | 0.0244 Mm.8983   |
| Eef1e1   | eukaryotic translation elongation factor 1 epsilon 1           | 1.25 | 0.0244 Mm.36683  |
| Rab32    | RAB32, member RAS oncogene family                              | 1.26 | 0.0244 Mm.31486  |
| Actr1b   | ARP1 actin-related protein 1 homolog B (yeast)                 | 1.31 | 0.0244 Mm.28521  |
| Ets1     | E26 avian leukemia oncogene 1, 5' domain                       | 0.67 | 0.0245 Mm.292415 |
| Gga2     | golgi associated, gamma adaptin ear containing, ARF bindi      | 0.84 | 0.0245 Mm.29619  |
| Rps8     | ribosomal protein S8                                           | 1.31 | 0.0245 Mm.309793 |
| Lmcd1    | LIM and cysteine-rich domains 1                                | 1.49 | 0.0245 Mm.234441 |
| Itga6    | integrin alpha 6                                               | 1.60 | 0.0246 Mm.225096 |
| Slc40a1  | solute carrier family 40 (iron-regulated transporter), membe   | 0.80 | 0.0247 Mm.28756  |
| Nptx1    | neuronal pentraxin 1                                           | 1.23 | 0.0247 Mm.5142   |
| Col4a2   | procollagen, type IV, alpha 2                                  | 1.25 | 0.0248 Mm.181021 |
| Adam15   | a disintegrin and metalloproteinase domain 15 (metargidin)     | 1.26 | 0.0248 Mm.172610 |
| Cd5l     | CD5 antigen-like                                               | 1.42 | 0.0248 Mm.6676   |
| Ivd      | isovaleryl coenzyme A dehydrogenase                            | 0.80 | 0.0249 Mm.6635   |
| Brd8     | bromodomain containing 8                                       | 0.84 | 0.0249 Mm.45602  |
| Cyb561   | cytochrome b-561                                               | 1.24 | 0.0249 Mm.149403 |
| Psa      | puromycin-sensitive aminopeptidase                             | 1.26 | 0.0249 Mm.29824  |
| Ptpn12   | protein tyrosine phosphatase, non-receptor type 12             | 1.27 | 0.0249 Mm.228533 |
| Pgf      | placental growth factor                                        | 1.33 | 0.0249 Mm.4809   |
| Znhit1   | zinc finger, HIT domain containing 1                           | 1.43 | 0.0249 Mm.273147 |
| Slc6a4   | solute carrier family 6 (neurotransmitter transporter, serotor | 0.67 | 0.025 Mm.3907    |
| Zfp288   | zinc finger protein 288                                        | 0.68 | 0.025 Mm.211212  |
| Ypel1    | yippee-like 1 (Drosophila)                                     | 0.84 | 0.025 Mm.237941  |
| Snx2     | sorting nexin 2                                                | 1.30 | 0.025 Mm.252171  |

|           |                                                               |      |                  |
|-----------|---------------------------------------------------------------|------|------------------|
| Nr1d2     | nuclear receptor subfamily 1, group D, member 2               | 0.57 | 0.0251 Mm.26587  |
| Pde4b     | phosphodiesterase 4B, cAMP specific                           | 0.65 | 0.0251 Mm.124710 |
| Spata6    | spermatogenesis associated 6                                  | 1.23 | 0.0252 Mm.275526 |
| Ssr1      | signal sequence receptor, alpha                               | 0.75 | 0.0254 Mm.138725 |
| Cpeb4     | cytoplasmic polyadenylation element binding protein 4         | 1.28 | 0.0255 Mm.23178  |
| Spock2    | sparc/osteonectin, cwcv and kazal-like domains proteoglyc:    | 0.67 | 0.0256 Mm.153429 |
| Myo10     | myosin X                                                      | 0.75 | 0.0256 Mm.60590  |
| Numb      | numb gene homolog (Drosophila)                                | 0.77 | 0.0256 Mm.4390   |
| Invs      | inversin                                                      | 0.81 | 0.0256 Mm.110147 |
| Tce4      | T-complex expressed gene 4                                    | 0.81 | 0.0256 Mm.277304 |
| Cops5     | COP9 (constitutive photomorphogenic) homolog, subunit 5       | 1.21 | 0.0257 Mm.242459 |
| Fbxl12    | F-box and leucine-rich repeat protein 12                      | 0.82 | 0.0259 Mm.24608  |
| Copa      | coatamer protein complex subunit alpha                        | 1.22 | 0.026 Mm.30041   |
| Mmp15     | matrix metalloproteinase 15                                   | 0.63 | 0.0263 Mm.217116 |
| Hsd11b1   | hydroxysteroid 11-beta dehydrogenase 1                        | 0.75 | 0.0263 Mm.28328  |
| Aqp5      | aquaporin 5                                                   | 0.77 | 0.0263 Mm.45580  |
| Cnn3      | calponin 3, acidic                                            | 0.78 | 0.0263 Mm.275555 |
| Ppic      | peptidylprolyl isomerase C                                    | 1.21 | 0.0263 Mm.4587   |
| Tnni3     | troponin I, cardiac                                           | 0.57 | 0.0264 Mm.604    |
| Lst1      | leukocyte specific transcript 1                               | 0.69 | 0.0267 Mm.19379  |
| Mthfd2    | methylenetetrahydrofolate dehydrogenase (NAD+ depende         | 1.41 | 0.0267 Mm.443    |
| Surf1     | surfeit gene 1                                                | 0.75 | 0.0268 Mm.6874   |
| Rps6ka2   | ribosomal protein S6 kinase, polypeptide 2                    | 0.80 | 0.0268 Mm.268383 |
| Hak       | heart alpha-kinase                                            | 0.85 | 0.0268 Mm.296528 |
| Igh-VJ558 | immunoglobulin heavy chain (J558 family)                      | 0.47 | 0.0269 Mm.240437 |
| Pon3      | paraoxonase 3                                                 | 0.73 | 0.0269 Mm.9122   |
| Epb4.1l4a | erythrocyte protein band 4.1-like 4a                          | 0.80 | 0.0269 Mm.3465   |
| Crk       | v-crk sarcoma virus CT10 oncogene homolog (avian)             | 0.84 | 0.027 Mm.280125  |
| Uap1      | UDP-N-acetylglucosamine pyrophosphorylase 1                   | 1.28 | 0.027 Mm.27969   |
| Eif5      | eukaryotic translation initiation factor 5                    | 1.28 | 0.027 Mm.271222  |
| Osbpl1a   | oxysterol binding protein-like 1A                             | 0.79 | 0.0271 Mm.259470 |
| Gcl       | germ cell-less homolog (Drosophila)                           | 0.81 | 0.0271 Mm.74594  |
| Efnb1     | ephrin B1                                                     | 0.82 | 0.0271 Mm.3374   |
| Pcbp3     | poly(rC) binding protein 3                                    | 0.86 | 0.0271 Mm.272803 |
| Inpp5d    | inositol polyphosphate-5-phosphatase D                        | 1.24 | 0.0271 Mm.15105  |
| Snap23    | synaptosomal-associated protein 23                            | 1.48 | 0.0271 Mm.245715 |
| Adamts15  | a disintegrin-like and metalloprotease (reprolysin type) with | 1.55 | 0.0271 Mm.65867  |

|          |                                                                 |      |                  |
|----------|-----------------------------------------------------------------|------|------------------|
| Sort1    | sortilin 1                                                      | 0.77 | 0.0272 Mm.157119 |
| Sec23ip  | Sec23 interacting protein                                       | 1.18 | 0.0272 Mm.21163  |
| Insl3    | insulin-like 3                                                  | 1.24 | 0.0272 Mm.249645 |
| Spib     | Spi-B transcription factor (Spi-1/PU.1 related)                 | 0.74 | 0.0275 Mm.8012   |
| G22p1    | thyroid autoantigen                                             | 1.19 | 0.0275 Mm.288809 |
| Prdx5    | peroxiredoxin 5                                                 | 1.25 | 0.0275 Mm.279782 |
| Adm      | adrenomedullin                                                  | 1.89 | 0.0275 Mm.1408   |
| Eif4ebp1 | eukaryotic translation initiation factor 4E binding protein 1   | 1.33 | 0.0276 Mm.6700   |
| Trpm7    | transient receptor potential cation channel, subfamily M, mem   | 1.41 | 0.0276 Mm.244705 |
| Akap12   | A kinase (PRKA) anchor protein (gravin) 12                      | 0.68 | 0.0279 Mm.27481  |
| Kcnd2    | potassium voltage-gated channel, Shal-related family, mem       | 0.84 | 0.0279 Mm.132309 |
| Ggps1    | geranylgeranyl diphosphate synthase 1                           | 1.31 | 0.0279 Mm.148039 |
| Crip1    | cysteine-rich protein 1 (intestinal)                            | 0.74 | 0.028 Mm.272368  |
| Hdac5    | histone deacetylase 5                                           | 0.81 | 0.028 Mm.22665   |
| Als2     | amyotrophic lateral sclerosis 2 (juvenile) homolog (human)      | 0.83 | 0.0283 Mm.272078 |
| Sfpq     | splicing factor proline/glutamine rich (polypyrimidine tract bi | 1.23 | 0.0283 Mm.277094 |
| Pak1     | p21 (CDKN1A)-activated kinase 1                                 | 1.25 | 0.0283 Mm.260227 |
| Slc25a4  | solute carrier family 25 (mitochondrial carrier; adenine nucle  | 1.29 | 0.0283 Mm.16228  |
| Hspb1    | heat shock protein 1                                            | 1.40 | 0.0283 Mm.13849  |
| Tirap    | toll-interleukin 1 receptor (TIR) domain-containing adaptor p   | 0.70 | 0.0284 Mm.23987  |
| Cyp2e1   | cytochrome P450, family 2, subfamily e, polypeptide 1           | 0.61 | 0.0285 Mm.21758  |
| Bzw1     | basic leucine zipper and W2 domains 1                           | 1.24 | 0.0285 Mm.21848  |
| Npr2     | natriuretic peptide receptor 2                                  | 0.74 | 0.0287 Mm.103477 |
| Ccnl2    | cyclin L2                                                       | 0.79 | 0.0287 Mm.23492  |
| Adrb3    | adrenergic receptor, beta 3                                     | 0.81 | 0.0287 Mm.278475 |
| Nrbf2    | nuclear receptor binding factor 2                               | 1.30 | 0.0287 Mm.136223 |
| Pdgfrb   | platelet derived growth factor receptor, beta polypeptide       | 1.35 | 0.0287 Mm.4146   |
| Hrmt111  | heterogeneous nuclear ribonucleoprotein methyltransferase       | 0.78 | 0.0288 Mm.32020  |
| Slfn4    | schlafen 4                                                      | 0.49 | 0.0289 Mm.38192  |
| Zfp57    | zinc finger protein 57                                          | 0.78 | 0.0289 Mm.21362  |
| Foxa2    | forkhead box A2                                                 | 0.83 | 0.0289 Mm.938    |
| Slc11a1  | solute carrier family 11 (proton-coupled divalent metal ion tra | 1.22 | 0.0289 Mm.2913   |
| Wbscr5   | Williams-Beuren syndrome chromosome region 5 homolog            | 1.28 | 0.0289 Mm.23955  |
| Pappa    | pregnancy-associated plasma protein A                           | 1.59 | 0.0289 Mm.103481 |
| Tcap     | titin-cap                                                       | 0.62 | 0.029 Mm.10762   |
| Man2a1   | mannosidase 2, alpha 1                                          | 1.30 | 0.0292 Mm.2433   |
| Sh3gl3   | SH3-domain GRB2-like 3                                          | 0.82 | 0.0293 Mm.736    |

|         |                                                                      |      |                  |
|---------|----------------------------------------------------------------------|------|------------------|
| Mbp     | myelin basic protein                                                 | 0.82 | 0.0294 Mm.252063 |
| Dbccr1  | deleted in bladder cancer chromosome region candidate 1              | 1.27 | 0.0294 Mm.248788 |
| Rab20   | RAB20, member RAS oncogene family                                    | 1.42 | 0.0294 Mm.234262 |
| Ptprd   | protein tyrosine phosphatase, receptor type, D                       | 0.76 | 0.0295 Mm.184021 |
| Stat3   | signal transducer and activator of transcription 3                   | 1.20 | 0.0295 Mm.249934 |
| Ian6    | immune associated nucleotide 6                                       | 0.68 | 0.0296 Mm.24781  |
| Fbxo9   | f-box only protein 9                                                 | 0.77 | 0.0296 Mm.28584  |
| Fnta    | farnesyltransferase, CAAX box, alpha                                 | 0.78 | 0.0296 Mm.3496   |
| Eps15   | epidermal growth factor receptor pathway substrate 15                | 0.78 | 0.0296 Mm.22627  |
| Bcl6b   | B-cell CLL/lymphoma 6, member B                                      | 0.80 | 0.0296 Mm.12930  |
| Ddah2   | dimethylarginine dimethylaminohydrolase 2                            | 0.81 | 0.0296 Mm.1457   |
| Syne2   | synaptic nuclear envelope 2                                          | 0.67 | 0.0297 Mm.26652  |
| Nans    | N-acetylneuraminic acid synthase (sialic acid synthase)              | 1.25 | 0.0297 Mm.249349 |
| Galns   | galactosamine (N-acetyl)-6-sulfate sulfatase                         | 1.25 | 0.0297 Mm.34702  |
| Smardc1 | SWI/SNF related, matrix associated, actin dependent regul:           | 0.78 | 0.0298 Mm.22478  |
| Sca10   | spinocerebellar ataxia 10 homolog (human)                            | 0.86 | 0.03 Mm.248906   |
| Pcoln3  | procollagen (type III) N-endopeptidase                               | 1.19 | 0.03 Mm.41596    |
| Osbpl2  | oxysterol binding protein-like 2                                     | 0.78 | 0.0301 Mm.253578 |
| Tfb1m   | transcription factor B1, mitochondrial                               | 0.84 | 0.0301 Mm.226554 |
| Elt1    | EGF, latrophilin seven transmembrane domain containing 1             | 1.26 | 0.0301 Mm.27242  |
| Clca3   | chloride channel calcium activated 3                                 | 5.17 | 0.0301 Mm.33483  |
| Tnfrsf7 | tumor necrosis factor receptor superfamily, member 7                 | 0.81 | 0.0302 Mm.121    |
| Stx18   | syntaxin 18                                                          | 1.24 | 0.0303 Mm.18959  |
| Entpd5  | ectonucleoside triphosphate diphosphohydrolase 5                     | 0.76 | 0.0304 Mm.10211  |
| Gda     | guanine deaminase                                                    | 1.30 | 0.0304 Mm.45054  |
| Gp49b   | glycoprotein 49 B                                                    | 1.35 | 0.0304 Mm.34408  |
| Pdlim2  | PDZ and LIM domain 2                                                 | 0.82 | 0.0306 Mm.283968 |
| Gatm    | glycine amidinotransferase (L-arginine:glycine amidinotrans          | 0.72 | 0.0307 Mm.29975  |
| Sfrs4   | splicing factor, arginine/serine-rich 4 (SRp75)                      | 0.84 | 0.0307 Mm.2478   |
| Bteb1   | basic transcription element binding protein 1                        | 1.25 | 0.0307 Mm.291595 |
| Tbx21   | T-box 21                                                             | 0.80 | 0.0308 Mm.94519  |
| Tpp2    | tripeptidyl peptidase II                                             | 1.23 | 0.0308 Mm.234139 |
| Ms4a6c  | membrane-spanning 4-domains, subfamily A, member 6C                  | 1.39 | 0.0308 Mm.87745  |
| Krt1-10 | keratin complex 1, acidic, gene 10                                   | 0.80 | 0.031 Mm.22662   |
| Zfp105  | zinc finger protein 105                                              | 0.84 | 0.031 Mm.290595  |
| Tubgcp5 | tubulin, gamma complex associated protein 5                          | 0.80 | 0.0311 Mm.284306 |
| Atp5g2  | ATP synthase, H <sup>+</sup> transporting, mitochondrial F0 complex, | 0.82 | 0.0311 Mm.301327 |

|         |                                                              |      |                  |
|---------|--------------------------------------------------------------|------|------------------|
| Xpa     | xeroderma pigmentosum, complementation group A               | 0.83 | 0.0311 Mm.247036 |
| Cugbp2  | CUG triplet repeat,RNA binding protein 2                     | 1.39 | 0.0311 Mm.147091 |
| Gtf2i   | general transcription factor II I                            | 0.76 | 0.0312 Mm.293003 |
| Syne1   | synaptic nuclear envelope 1                                  | 0.78 | 0.0312 Mm.301694 |
| Rgl2    | ral guanine nucleotide dissociation stimulator,-like 2       | 0.79 | 0.0312 Mm.43777  |
| Igh-1   | immunoglobulin heavy chain 1 (serum IgG2a)                   | 0.82 | 0.0312 Mm.144308 |
| Il16    | interleukin 16                                               | 0.83 | 0.0312 Mm.10137  |
| Cpsf4   | cleavage and polyadenylation specific factor 4               | 0.85 | 0.0312 Mm.196884 |
| Agpat3  | 1-acylglycerol-3-phosphate O-acyltransferase 3               | 1.20 | 0.0312 Mm.299540 |
| Uxs1    | UDP-glucuronate decarboxylase 1                              | 1.26 | 0.0312 Mm.201248 |
| Gla     | galactosidase, alpha                                         | 1.32 | 0.0312 Mm.1114   |
| Mapt    | microtubule-associated protein tau                           | 0.62 | 0.0314 Mm.1287   |
| Catnd2  | catenin delta 2                                              | 0.84 | 0.0314 Mm.6680   |
| Ipp     | IAP promoted placental gene                                  | 0.85 | 0.0314 Mm.1350   |
| Glipr2  | GLI pathogenesis-related 2                                   | 1.32 | 0.0315 Mm.22213  |
| Dock8   | dedicator of cytokinesis 8                                   | 0.71 | 0.0316 Mm.32546  |
| Sema5a  | sema domain, seven thrombospondin repeats (type 1 and t      | 1.33 | 0.0316 Mm.260374 |
| S100a6  | S100 calcium binding protein A6 (calcyclin)                  | 1.43 | 0.0316 Mm.100144 |
| Igk-V8  | immunoglobulin kappa chain variable 8 (V8)                   | 0.77 | 0.0317 Mm.244362 |
| Unc119  | unc-119 homolog (C. elegans)                                 | 0.79 | 0.0317 Mm.284811 |
| Hmgcr   | 3-hydroxy-3-methylglutaryl-Coenzyme A reductase              | 1.25 | 0.0317 Mm.260207 |
| Sh3d1B  | SH3 domain protein 1B                                        | 0.81 | 0.0318 Mm.139128 |
| Epor    | erythropoietin receptor                                      | 0.85 | 0.0319 Mm.2653   |
| Map3k11 | mitogen activated protein kinase kinase kinase 11            | 0.82 | 0.032 Mm.185026  |
| Il1r1   | interleukin 1 receptor, type I                               | 1.24 | 0.032 Mm.896     |
| Nid1    | nidogen 1                                                    | 1.47 | 0.0323 Mm.4691   |
| Tpst1   | protein-tyrosine sulfotransferase 1                          | 0.79 | 0.0324 Mm.16084  |
| Bcl10   | B-cell leukemia/lymphoma 10                                  | 1.18 | 0.0324 Mm.239141 |
| Gnb4    | guanine nucleotide binding protein, beta 4                   | 0.81 | 0.0325 Mm.139192 |
| Prdx3   | peroxiredoxin 3                                              | 1.31 | 0.0325 Mm.29821  |
| Slc22a3 | solute carrier family 22 (organic cation transporter), membe | 0.78 | 0.0326 Mm.99252  |
| Gnai2   | guanine nucleotide binding protein, alpha inhibiting 2       | 0.85 | 0.0326 Mm.196464 |
| Lsm4    | LSM4 homolog, U6 small nuclear RNA associated (S. cere       | 1.20 | 0.0326 Mm.248188 |
| Ldh1    | lactate dehydrogenase 1, A chain                             | 1.27 | 0.0329 Mm.29324  |
| Ocln    | occludin                                                     | 0.74 | 0.0331 Mm.4807   |
| Slfn2   | schlafen 2                                                   | 1.45 | 0.0332 Mm.278689 |
| Stau2   | staufer (RNA binding protein) homolog 2 (Drosophila)         | 0.84 | 0.0333 Mm.216257 |



|          |                                                              |      |                  |
|----------|--------------------------------------------------------------|------|------------------|
| Ms4a6b   | membrane-spanning 4-domains, subfamily A, member 6B          | 1.47 | 0.0333 Mm.278844 |
| Tnip1    | TNFAIP3 interacting protein 1                                | 0.84 | 0.0334 Mm.259671 |
| Ddx6     | DEAD (Asp-Glu-Ala-Asp) box polypeptide 6                     | 1.61 | 0.0334 Mm.130899 |
| Fzd7     | frizzled homolog 7 (Drosophila)                              | 0.65 | 0.0337 Mm.297906 |
| Havcr1   | hepatitis A virus cellular receptor 1                        | 0.85 | 0.0337 Mm.17771  |
| Actr1a   | ARP1 actin-related protein 1 homolog A (yeast)               | 1.21 | 0.0337 Mm.132764 |
| Galk2    | galactokinase 2                                              | 1.26 | 0.0337 Mm.20216  |
| Tpcn2    | two pore segment channel 2                                   | 1.27 | 0.0337 Mm.102235 |
| P4hb     | prolyl 4-hydroxylase, beta polypeptide                       | 1.20 | 0.0338 Mm.16660  |
| Eif2s2   | eukaryotic translation initiation factor 2, subunit 2 (beta) | 1.24 | 0.0339 Mm.29859  |
| Tbx3     | T-box 3                                                      | 0.76 | 0.034 Mm.261742  |
| Ralbp1   | ralA binding protein 1                                       | 0.81 | 0.034 Mm.17009   |
| Vapb     | vesicle-associated membrane protein, associated protein B    | 0.82 | 0.034 Mm.260456  |
| Bdkrb1   | bradykinin receptor, beta 1                                  | 1.42 | 0.034 Mm.298087  |
| Prkcm    | protein kinase C, mu                                         | 0.81 | 0.0341 Mm.282880 |
| Hoxa5    | homeo box A5                                                 | 0.70 | 0.0342 Mm.173    |
| Cbx4     | chromobox homolog 4 (Drosophila Pc class)                    | 0.81 | 0.0342 Mm.268070 |
| Hunk     | hormonally upregulated Neu-associated kinase                 | 0.85 | 0.0342 Mm.125874 |
| Slc25a19 | solute carrier family 25 (mitochondrial deoxynucleotide carr | 1.15 | 0.0342 Mm.24594  |
| Prkacb   | protein kinase, cAMP dependent, catalytic, beta              | 1.20 | 0.0342 Mm.16766  |
| Rnf4     | ring finger protein 4                                        | 1.26 | 0.0342 Mm.113388 |
| Col6a1   | procollagen, type VI, alpha 1                                | 1.37 | 0.0342 Mm.2509   |
| Smpx     | small muscle protein, X-linked                               | 0.63 | 0.0343 Mm.140340 |
| Ptgfr    | prostaglandin F receptor                                     | 0.81 | 0.0345 Mm.4170   |
| Mds1     | myelodysplasia syndrome 1 homolog (human)                    | 0.84 | 0.0345 Mm.42023  |
| Nptxr    | neuronal pentraxin receptor                                  | 1.25 | 0.0345 Mm.38438  |
| Inpp5b   | inositol polyphosphate-5-phosphatase B                       | 0.76 | 0.0346 Mm.296202 |
| Ppp2r5a  | protein phosphatase 2, regulatory subunit B (B56), alpha is  | 0.81 | 0.0346 Mm.205569 |
| Loxl2    | lysyl oxidase-like 2                                         | 1.45 | 0.0346 Mm.116714 |
| Pten     | phosphatase and tensin homolog                               | 1.76 | 0.0346 Mm.245395 |
| Ccl2     | chemokine (C-C motif) ligand 2                               | 1.88 | 0.0346 Mm.290320 |
| Klrc1    | killer cell lectin-like receptor subfamily C, member 1       | 0.86 | 0.0347 Mm.56899  |
| Tgif     | TG interacting factor                                        | 1.21 | 0.0352 Mm.101034 |
| Adam9    | a disintegrin and metalloproteinase domain 9 (meltrin gamn   | 1.19 | 0.0353 Mm.28908  |
| Clk4     | CDC like kinase 4                                            | 0.71 | 0.0354 Mm.239354 |
| Fgfr3    | fibroblast growth factor receptor 3                          | 0.71 | 0.0354 Mm.6904   |
| Saa3     | serum amyloid A 3                                            | 2.83 | 0.0354 Mm.14277  |

|         |                                                            |      |                  |
|---------|------------------------------------------------------------|------|------------------|
| Tpbpb   | trophoblast specific protein beta                          | 0.76 | 0.0355 Mm.297920 |
| Cd209a  | CD209a antigen                                             | 0.79 | 0.0355 Mm.32510  |
| Prpf8   | pre-mRNA processing factor 8                               | 0.82 | 0.0355 Mm.3757   |
| Hspa9a  | heat shock protein, A                                      | 1.20 | 0.0355 Mm.209419 |
| Pkd2    | polycystic kidney disease 2                                | 1.49 | 0.0355 Mm.6442   |
| Msr2    | macrophage scavenger receptor 2                            | 1.59 | 0.0355 Mm.45173  |
| Csrp3   | cysteine and glycine-rich protein 3                        | 0.69 | 0.0357 Mm.17235  |
| Tst     | thiosulfate sulfurtransferase, mitochondrial               | 0.74 | 0.0357 Mm.15312  |
| Mtcp1   | mature T-cell proliferation 1                              | 0.83 | 0.0357 Mm.16366  |
| Cldn3   | claudin 3                                                  | 1.39 | 0.0357 Mm.271763 |
| Ccr2    | chemokine (C-C) receptor 2                                 | 1.60 | 0.0357 Mm.6272   |
| Dnase1  | deoxyribonuclease I                                        | 0.85 | 0.0359 Mm.239992 |
| Npc2    | Niemann Pick type C2                                       | 1.18 | 0.0362 Mm.282556 |
| Pecam   | platelet/endothelial cell adhesion molecule                | 0.74 | 0.0363 Mm.276652 |
| Sssca1  | Sjogren's syndrome/scleroderma autoantigen 1 homolog (h    | 1.24 | 0.0364 Mm.24281  |
| Agrn    | agrin                                                      | 0.79 | 0.0365 Mm.269006 |
| Ptgs1   | prostaglandin-endoperoxide synthase 1                      | 1.34 | 0.0365 Mm.290010 |
| Lias    | lipoic acid synthetase                                     | 1.21 | 0.0367 Mm.195776 |
| Tor1b   | torsin family 1, member B                                  | 1.54 | 0.0368 Mm.249164 |
| Sucgl1  | succinate-CoA ligase, GDP-forming, alpha subunit           | 0.84 | 0.0369 Mm.29845  |
| Mrps18b | mitochondrial ribosomal protein S18B                       | 1.23 | 0.0369 Mm.29484  |
| Tna     | tetranectin (plasminogen binding protein)                  | 0.59 | 0.037 Mm.34588   |
| Siat9   | sialyltransferase 9 (CMP-NeuAc:lactosylceramide alpha-2,3  | 0.79 | 0.037 Mm.38248   |
| Car14   | carbonic anhydrase 14                                      | 0.83 | 0.037 Mm.224836  |
| Lass5   | longevity assurance homolog 5 (S. cerevisiae)              | 0.84 | 0.037 Mm.9550    |
| Psm8    | proteasome (prosome, macropain) 26S subunit, non-ATPase    | 1.25 | 0.037 Mm.273152  |
| Mrc1    | mannose receptor, C type 1                                 | 1.47 | 0.037 Mm.2019    |
| Mpp6    | membrane protein, palmitoylated 6 (MAGUK p55 subfamily     | 1.51 | 0.037 Mm.41288   |
| Sdpr    | serum deprivation response                                 | 0.65 | 0.0371 Mm.255909 |
| Masp2   | mannan-binding lectin serine protease 2                    | 0.71 | 0.0371 Mm.22453  |
| Tmlhe   | trimethyllysine hydroxylase, epsilon                       | 0.78 | 0.0371 Mm.311888 |
| Blk     | B lymphoid kinase                                          | 0.79 | 0.0371 Mm.3962   |
| Sync    | syncoilin                                                  | 0.86 | 0.0371 Mm.132243 |
| Kist    | kinase interacting with leukemia-associated gene (stathmin | 1.21 | 0.0371 Mm.209150 |
| Mtac2d1 | membrane targeting (tandem) C2 domain containing 1         | 1.22 | 0.0371 Mm.275939 |
| Prss11  | protease, serine, 11 (Igf binding)                         | 0.74 | 0.0373 Mm.30156  |
| Wdr26   | WD repeat domain 26                                        | 1.24 | 0.0373 Mm.289082 |

|          |                                                               |      |                  |
|----------|---------------------------------------------------------------|------|------------------|
| Porcn    | porcupine homolog (Drosophila)                                | 1.28 | 0.0373 Mm.259670 |
| Ch25h    | cholesterol 25-hydroxylase                                    | 1.69 | 0.0373 Mm.30824  |
| Colec12  | collectin sub-family member 12                                | 0.82 | 0.0376 Mm.218571 |
| Epb4.9   | erythrocyte protein band 4.9                                  | 0.83 | 0.0376 Mm.210863 |
| Myct1    | myc target 1                                                  | 0.83 | 0.0376 Mm.33762  |
| Furin    | furin (paired basic amino acid cleaving enzyme)               | 1.19 | 0.0376 Mm.243921 |
| Siat7c   | sialyltransferase 7 ((alpha-N-acetylneuraminy) 2,3-betagal    | 0.75 | 0.0377 Mm.1563   |
| Anp32e   | acidic (leucine-rich) nuclear phosphoprotein 32 family, mem   | 1.23 | 0.0377 Mm.218657 |
| Nfkbib   | nuclear factor of kappa light chain gene enhancer in B-cells  | 1.27 | 0.0377 Mm.364    |
| Phex     | phosphate regulating gene with homologies to endopeptida      | 1.56 | 0.0377 Mm.2529   |
| Rap1a    | RAS-related protein-1a                                        | 0.79 | 0.0378 Mm.967    |
| Rora     | RAR-related orphan receptor alpha                             | 0.80 | 0.0378 Mm.271788 |
| Anxa1    | annexin A1                                                    | 1.20 | 0.0378 Mm.248360 |
| Akr1c13  | aldo-keto reductase family 1, member C13                      | 1.24 | 0.0378 Mm.27447  |
| Nupr1    | nuclear protein 1                                             | 1.38 | 0.0378 Mm.18742  |
| Gpam     | glycerol-3-phosphate acyltransferase, mitochondrial           | 0.76 | 0.0379 Mm.210196 |
| Ube2l3   | ubiquitin-conjugating enzyme E2L 3                            | 1.24 | 0.0379 Mm.299954 |
| Eif4ebp2 | eukaryotic translation initiation factor 4E binding protein 2 | 0.75 | 0.038 Mm.140186  |
| Tef      | thyrotroph embryonic factor                                   | 0.66 | 0.0381 Mm.270278 |
| Gprk5    | G protein-coupled receptor kinase 5                           | 0.78 | 0.0381 Mm.279400 |
| Tcfec    | transcription factor EC                                       | 1.28 | 0.0381 Mm.36217  |
| Pink1    | PTEN induced putative kinase 1                                | 1.40 | 0.0381 Mm.18539  |
| Eif5a    | eukaryotic translation initiation factor 5A                   | 1.18 | 0.0382 Mm.196607 |
| Gpcr25   | G-protein coupled receptor 25                                 | 1.22 | 0.0382 Mm.2840   |
| Adcy4    | adenylate cyclase 4                                           | 0.75 | 0.0386 Mm.287010 |
| Msln     | mesothelin                                                    | 1.68 | 0.0389 Mm.17510  |
| Gfpt2    | glutamine fructose-6-phosphate transaminase 2                 | 1.43 | 0.0391 Mm.24402  |
| Mapkapk2 | MAP kinase-activated protein kinase 2                         | 1.19 | 0.0394 Mm.221235 |
| Lap3     | leucine aminopeptidase 3                                      | 1.21 | 0.0394 Mm.286830 |
| Alox5ap  | arachidonate 5-lipoxygenase activating protein                | 1.30 | 0.0394 Mm.19844  |
| Dicer1   | Dicer1, Dcr-1 homolog (Drosophila)                            | 0.80 | 0.0395 Mm.21135  |
| Plcb1    | phospholipase C, beta 1                                       | 0.84 | 0.0395 Mm.42083  |
| Gmfb     | glia maturation factor, beta                                  | 1.32 | 0.0395 Mm.87312  |
| Gng11    | guanine nucleotide binding protein (G protein), gamma 11      | 0.76 | 0.0396 Mm.25547  |
| Lphn1    | latrophilin 1                                                 | 0.83 | 0.0396 Mm.260733 |
| Inhbb    | inhibin beta-B                                                | 1.30 | 0.0397 Mm.3092   |
| Ccnd2    | cyclin D2                                                     | 1.80 | 0.0397 Mm.294136 |

|               |                                                              |      |                  |
|---------------|--------------------------------------------------------------|------|------------------|
| Zfp185        | zinc finger protein 185                                      | 0.81 | 0.0398 Mm.1161   |
| Crip2         | cysteine rich protein 2                                      | 0.86 | 0.0398 Mm.294801 |
| Ly6c          | lymphocyte antigen 6 complex, locus C                        | 1.25 | 0.0399 Mm.298163 |
| Ninj1         | ninjurin 1                                                   | 1.36 | 0.0399 Mm.18503  |
| Bk            | brain and kidney protein                                     | 0.83 | 0.04 Mm.156558   |
| Ifi16         | interferon, gamma-inducible protein 16                       | 1.38 | 0.0401 Mm.212870 |
| Tegt          | testis enhanced gene transcript                              | 0.84 | 0.0402 Mm.102104 |
| Cocoacrisp    | Cocoacrisp protein                                           | 0.83 | 0.0403 Mm.289625 |
| 4833416I09Rik | presenilin-like protein 4                                    | 0.87 | 0.0404 Mm.246376 |
| Mad4          | Max dimerization protein 4                                   | 1.23 | 0.0404 Mm.132901 |
| Kdelr1        | KDEL (Lys-Asp-Glu-Leu) endoplasmic reticulum protein ret     | 1.32 | 0.0404 Mm.25045  |
| Fnbp2         | formin binding protein 2                                     | 0.83 | 0.0405 Mm.25694  |
| Scarb1        | scavenger receptor class B, member 1                         | 1.44 | 0.0405 Mm.282242 |
| H2-T10        | histocompatibility 2, T region locus 10                      | 0.86 | 0.0406 Mm.87776  |
| Osbpl9        | oxysterol binding protein-like 9                             | 1.16 | 0.0406 Mm.92314  |
| Dusp12        | dual specificity phosphatase 12                              | 0.83 | 0.0407 Mm.34365  |
| Kptn          | kaptin                                                       | 0.87 | 0.0407 Mm.41101  |
| Vars2         | valyl-tRNA synthetase 2                                      | 1.23 | 0.0407 Mm.28420  |
| Rnase3        | ribonuclease, RNase A family 3                               | 0.53 | 0.0408 Mm.317170 |
| Cnn2          | calponin 2                                                   | 0.80 | 0.0408 Mm.278791 |
| Grasp         | GRP1 (general receptor for phosphoinositides 1)-associate    | 0.81 | 0.0408 Mm.276573 |
| Ube2j1        | ubiquitin-conjugating enzyme E2, J1                          | 1.22 | 0.0408 Mm.32920  |
| Pea15         | phosphoprotein enriched in astrocytes 15                     | 0.81 | 0.0409 Mm.544    |
| Hes6          | hairy and enhancer of split 6 (Drosophila)                   | 1.21 | 0.041 Mm.280029  |
| Mmrp19        | monocyte macrophage 19                                       | 0.83 | 0.0411 Mm.24772  |
| Tm4sf1        | transmembrane 4 superfamily member 1                         | 0.77 | 0.0412 Mm.856    |
| Mark3         | MAP/microtubule affinity-regulating kinase 3                 | 0.84 | 0.0412 Mm.28678  |
| Slc29a3       | solute carrier family 29 (nucleoside transporters), member 3 | 1.20 | 0.0414 Mm.284462 |
| Pgam1         | phosphoglycerate mutase 1                                    | 1.28 | 0.0414 Mm.16783  |
| Hlx           | H2.0-like homeo box gene                                     | 0.78 | 0.0415 Mm.1347   |
| Cldn7         | claudin 7                                                    | 0.80 | 0.0415 Mm.281896 |
| Ccl7          | chemokine (C-C motif) ligand 7                               | 1.65 | 0.0416 Mm.16091  |
| Cxcl13        | chemokine (C-X-C motif) ligand 13                            | 2.31 | 0.0416 Mm.10116  |
| Tmem5         | transmembrane protein 5                                      | 1.20 | 0.0417 Mm.236764 |
| Vasp          | vasodilator-stimulated phosphoprotein                        | 1.22 | 0.0417 Mm.9684   |
| Hspa4         | heat shock protein 4                                         | 1.22 | 0.0417 Mm.239865 |
| Gstz1         | glutathione transferase zeta 1 (maleylacetoacetate isomera   | 0.79 | 0.0418 Mm.151475 |

|          |                                                            |      |                  |
|----------|------------------------------------------------------------|------|------------------|
| Pold3    | polymerase (DNA-directed), delta 3, accessory subunit      | 0.85 | 0.0419 Mm.37562  |
| Kcnh1    | potassium voltage-gated channel, subfamily H (eag-related) | 1.23 | 0.0419 Mm.4489   |
| Flnb     | filamin, beta                                              | 0.75 | 0.0421 Mm.249558 |
| Txnrd3   | thioredoxin reductase 3                                    | 0.81 | 0.0421 Mm.229332 |
| Eat2     | EWS/FLI1 activated transcript 2                            | 1.19 | 0.0422 Mm.57009  |
| Csf2     | colony stimulating factor 2 (granulocyte-macrophage)       | 0.83 | 0.0423 Mm.4922   |
| Rnf11    | ring finger protein 11                                     | 1.17 | 0.0423 Mm.25228  |
| Fxyd3    | FXDYD domain-containing ion transport regulator 3          | 1.23 | 0.0423 Mm.263847 |
| Emp3     | epithelial membrane protein 3                              | 1.25 | 0.0423 Mm.20829  |
| Wnt3a    | wingless-related MMTV integration site 3A                  | 0.83 | 0.0424 Mm.1367   |
| Arl2bp   | ADP-ribosylation factor-like 2 binding protein             | 0.82 | 0.0425 Mm.279977 |
| Aplp2    | amyloid beta (A4) precursor-like protein 2                 | 0.84 | 0.0425 Mm.19133  |
| Klrb1d   | killer cell lectin-like receptor subfamily B member 1D     | 1.18 | 0.0425 Mm.14489  |
| Ppp1r14b | protein phosphatase 1, regulatory (inhibitor) subunit 14B  | 1.28 | 0.0425 Mm.296842 |
| Itga8    | integrin alpha 8                                           | 0.52 | 0.0426 Mm.220860 |
| Lcn7     | lipocalin 7                                                | 1.38 | 0.0426 Mm.15801  |
| Bace     | beta-site APP cleaving enzyme                              | 0.83 | 0.0427 Mm.24044  |
| Prcc     | papillary renal cell carcinoma (translocation-associated)  | 1.29 | 0.0427 Mm.35089  |
| Unc93b   | unc-93 homolog B (C. elegans)                              | 1.31 | 0.0427 Mm.262094 |
| Smc5l1   | SMC5 structural maintenance of chromosomes 5-like 1 (ye)   | 0.80 | 0.0428 Mm.23267  |
| F13a     | coagulation factor XIII, alpha subunit                     | 2.13 | 0.0428 Mm.235105 |
| Slc23a2  | solute carrier family 23 (nucleobase transporters), member | 0.79 | 0.0429 Mm.102014 |
| Apg5l    | autophagy 5-like (S. cerevisiae)                           | 1.20 | 0.0431 Mm.22264  |
| Srfcp    | SRF co-factor protein (cardiac and smooth muscle)          | 1.25 | 0.0431 Mm.32257  |
| Acacb    | acetyl-Coenzyme A carboxylase beta                         | 0.82 | 0.0432 Mm.173067 |
| Axot     | axotrophin                                                 | 1.47 | 0.0432 Mm.260635 |
| Dp111    | deleted in polyposis 1-like 1                              | 0.84 | 0.0433 Mm.28147  |
| Fbxo2    | F-box only protein 2                                       | 1.31 | 0.0433 Mm.262287 |
| Grp      | gastrin releasing peptide                                  | 1.41 | 0.0433 Mm.20298  |
| Pclo     | piccolo (presynaptic cytomatrix protein)                   | 0.84 | 0.0434 Mm.279903 |
| Tap1     | transporter 1, ATP-binding cassette, sub-family B (MDR/TA  | 1.40 | 0.0436 Mm.207996 |
| Hbb-bh1  | hemoglobin Z, beta-like embryonic chain                    | 0.81 | 0.0437 Mm.196718 |
| Mef2a    | myocyte enhancer factor 2A                                 | 1.33 | 0.0437 Mm.250681 |
| Cd53     | CD53 antigen                                               | 1.19 | 0.0439 Mm.2692   |
| Arbp     | acidic ribosomal phosphoprotein P0                         | 1.20 | 0.0439 Mm.298083 |
| Sfrp2    | secreted frizzled-related sequence protein 2               | 1.46 | 0.0439 Mm.19155  |
| Twsg1    | twisted gastrulation homolog 1 (Drosophila)                | 0.78 | 0.0443 Mm.10153  |

|          |                                                              |      |                  |
|----------|--------------------------------------------------------------|------|------------------|
| Tbxas1   | thromboxane A synthase 1, platelet                           | 1.16 | 0.0443 Mm.4054   |
| Cul4b    | cullin 4B                                                    | 1.18 | 0.0445 Mm.26885  |
| Snx3     | sorting nexin 3                                              | 0.85 | 0.0446 Mm.277870 |
| Slc1a7   | solute carrier family 1, member 7                            | 1.19 | 0.0447 Mm.1056   |
| Adss     | adenylosuccinate synthetase, muscle                          | 1.45 | 0.0447 Mm.3440   |
| Ulk2     | Unc-51 like kinase 2 (C. elegans)                            | 0.82 | 0.0448 Mm.162025 |
| Lmna     | lamin A                                                      | 1.37 | 0.0448 Mm.243014 |
| Synpo    | synaptopodin                                                 | 1.22 | 0.0449 Mm.27313  |
| Ncf4     | neutrophil cytosolic factor 4                                | 0.79 | 0.0452 Mm.2068   |
| Casp1    | caspase 1                                                    | 0.79 | 0.0452 Mm.1051   |
| Mapk3    | mitogen activated protein kinase 3                           | 0.84 | 0.0452 Mm.8385   |
| Cd1d2    | CD1d2 antigen                                                | 0.86 | 0.0452 Mm.157907 |
| Metap1   | methionine aminopeptidase-like 1                             | 1.18 | 0.0452 Mm.152796 |
| Mrg1     | myeloid ecotropic viral integration site-related gene 1      | 1.22 | 0.0454 Mm.247566 |
| Ran      | RAN, member RAS oncogene family                              | 1.42 | 0.0456 Mm.7521   |
| Gart     | phosphoribosylglycinamide formyltransferase                  | 0.85 | 0.0457 Mm.4505   |
| Sgce     | sarcoglycan, epsilon                                         | 0.80 | 0.0458 Mm.8739   |
| Fyn      | Fyn proto-oncogene                                           | 0.83 | 0.0458 Mm.4848   |
| Prkcl    | protein kinase C, lambda                                     | 0.79 | 0.0459 Mm.291554 |
| E2f6     | E2F transcription factor 6                                   | 0.85 | 0.0461 Mm.23296  |
| Cxcr4    | chemokine (C-X-C motif) receptor 4                           | 0.67 | 0.0465 Mm.1401   |
| Sfrs2    | splicing factor, arginine/serine-rich 2 (SC-35)              | 0.84 | 0.0465 Mm.21841  |
| Rdgb2    | retinal degeneration B2 homolog (Drosophila)                 | 0.85 | 0.0466 Mm.239214 |
| Snx9     | sorting nexin 9                                              | 1.23 | 0.0466 Mm.89515  |
| Ell2     | elongation factor RNA polymerase II 2                        | 1.41 | 0.0466 Mm.21288  |
| Cx3cl1   | chemokine (C-X3-C motif) ligand 1                            | 0.83 | 0.0468 Mm.292711 |
| Dffa     | DNA fragmentation factor, alpha subunit                      | 0.83 | 0.0469 Mm.41433  |
| Arf4     | ADP-ribosylation factor 4                                    | 1.25 | 0.0469 Mm.281836 |
| Bnpl     | BCL2/adenovirus E1B 19kD interacting protein like            | 0.85 | 0.0471 Mm.276596 |
| Matr3    | matrin 3                                                     | 1.28 | 0.0474 Mm.215034 |
| Epb4.1l2 | erythrocyte protein band 4.1-like 2                          | 0.82 | 0.0475 Mm.210413 |
| Dbp      | D site albumin promoter binding protein                      | 0.33 | 0.0476 Mm.3459   |
| Lpp      | LIM domain containing preferred translocation partner in lip | 1.21 | 0.0476 Mm.209385 |
| Ppp1r2   | protein phosphatase 1, regulatory (inhibitor) subunit 2      | 1.39 | 0.0476 Mm.291593 |
| Rpl22    | ribosomal protein L22                                        | 0.77 | 0.0478 Mm.191936 |
| Cul3     | cullin 3                                                     | 1.23 | 0.0478 Mm.12665  |
| Aqp1     | aquaporin 1                                                  | 0.85 | 0.048 Mm.18625   |

|          |                                                                       |      |                   |
|----------|-----------------------------------------------------------------------|------|-------------------|
| Vamp2    | vesicle-associated membrane protein 2                                 | 0.83 | 0.0481 Mm.28643   |
| Ltk      | leukocyte tyrosine kinase                                             | 0.86 | 0.0482 Mm.1740    |
| Insig2   | insulin induced gene 2                                                | 1.22 | 0.0482 Mm.27136   |
| Acp5     | acid phosphatase 5, tartrate resistant                                | 1.43 | 0.0483 Mm.46354   |
| Rspodn   | thrombospondin type 1 domain containing gene                          | 0.75 | 0.0484 Mm.42202   |
| Zfp36l1  | zinc finger protein 36, C3H type-like 1                               | 1.25 | 0.0485 Mm.18571   |
| Etf1     | eukaryotic translation termination factor 1                           | 1.28 | 0.0486 Mm.3845    |
| Kctd2    | potassium channel tetramerisation domain containing 2                 | 0.78 | 0.0487 Mm.276299  |
| Rpl41    | ribosomal protein L41                                                 | 1.23 | 0.0487 Mm.290786  |
| Ppp3ca   | protein phosphatase 3, catalytic subunit, alpha isoform               | 0.86 | 0.0488 Mm.80565   |
| Des      | desmin                                                                | 1.18 | 0.0488 Mm.6712    |
| Ovgp1    | oviductal glycoprotein 1                                              | 0.83 | 0.049 Mm.5110     |
| Col18a1  | procollagen, type XVIII, alpha 1                                      | 1.19 | 0.0491 Mm.4352    |
| Camk2d   | calcium/calmodulin-dependent protein kinase II, delta                 | 1.30 | 0.0492 Mm.255822  |
| Gstt2    | glutathione S-transferase, theta 2                                    | 0.82 | 0.0493 Mm.24118   |
| Sfxn4    | sideroflexin 4                                                        | 0.84 | 0.0493 Mm.48179   |
| Akr1b7   | aldo-keto reductase family 1, member B7                               | 0.77 | 0.0494 Mm.14460   |
| Rpel1    | RPEL repeat containing 1                                              | 0.80 | 0.0494 Mm.160124  |
| Ilk      | integrin linked kinase                                                | 0.81 | 0.0494 Mm.274846  |
| Rsn      | restin (Reed-Steinberg cell-expressed intermediate filament)          | 0.83 | 0.0494 Mm.241109  |
| Fzd8     | frizzled homolog 8 (Drosophila)                                       | 0.84 | 0.0494 Mm.184289  |
| Echdc3   | enoyl Coenzyme A hydratase domain containing 3                        | 0.85 | 0.0494 Mm.38342   |
| Pkib     | protein kinase inhibitor beta, cAMP dependent, testis specific        | 1.15 | 0.0494 Mm.262135  |
| Ddx21    | DEAD (Asp-Glu-Ala-Asp) box polypeptide 21                             | 1.20 | 0.0494 Mm.25264   |
| Slc25a5  | solute carrier family 25 (mitochondrial carrier; adenine nucleotide)  | 1.18 | 0.0496 Mm.658     |
| Sdccag33 | serologically defined colon cancer antigen 33                         | 1.23 | 0.0496 Mm.102136  |
| Col5a3   | procollagen, type V, alpha 3                                          | 1.32 | 0.0496 Mm.30477   |
| Nxf1     | nuclear RNA export factor 1 homolog (S. cerevisiae)                   | 0.79 | 0.0497 Mm.7271    |
| Cd19     | CD19 antigen                                                          | 0.79 | 0.0498 Mm.4360    |
| Tm4sf3   | transmembrane 4 superfamily member 3                                  | 0.83 | 0.0498 Mm.22270   |
| Nte      | neuropathy target esterase                                            | 0.87 | 0.0498 Mm.23085   |
| Jak2     | Janus kinase 2                                                        | 1.14 | 0.0498 Mm.275839  |
| Slc6a2   | solute carrier family 6 (neurotransmitter transporter, noradrenaline) | 1.39 | 0.0498 Mm.57040   |
| Gorasp2  | golgi reassembly stacking protein 2                                   | 1.54 | 0.0498 Mm.271950  |
| BC002059 | cDNA sequence BC002059                                                | 0.79 | 0.0249 Mm.255974  |
| BC002216 | cDNA sequence BC002216                                                | 0.73 | 0.00106 Mm.25556  |
| BC002236 | cDNA sequence BC002236                                                | 1.26 | 0.00191 Mm.259200 |

|            |                                                         |      |                       |
|------------|---------------------------------------------------------|------|-----------------------|
| BC003296   | cDNA sequence BC003296                                  | 0.72 | 0.0153 Mm.25300       |
| BC004044   | cDNA sequence BC004044                                  | 1.28 | 0.0439 Mm.6419        |
| BC004056   | cDNA sequence BC004056                                  | 1.57 | 0.000777 Mm.279514    |
| BC006662   | cDNA sequence BC006662                                  | 1.30 | 0.0234 Mm.25240       |
| BC010552   | cDNA sequence BC010552                                  | 0.70 | 0.0176 Mm.33062       |
| BC011467   | cDNA sequence BC011467                                  | 0.68 | 0.0154 Mm.212812      |
| BC012871   | cDNA sequence BC012871                                  | 0.76 | 0.0119 Mm.100282      |
| BC013565   | cDNA sequence BC013565                                  | 0.76 | 0.0176 Mm.5296        |
| BC014685   | cDNA sequence BC014685                                  | 0.70 | 0.000329 Mm.170023    |
| BC019794   | cDNA sequence BC019794                                  | 0.72 | 0.00109 Mm.51437      |
| BC019943   | cDNA sequence BC019943                                  | 0.82 | 0.0342 Mm.174615      |
| BC020077   | cDNA sequence BC020077                                  | 0.68 | 0.00291 Mm.291250     |
| BC020535   | cDNA sequence BC020535                                  | 0.61 | 0.00023 Mm.216317     |
| BC021381   | cDNA sequence BC021381                                  | 0.76 | 0.00562 Mm.35661      |
| BC022687   | cDNA sequence BC022687                                  | 0.45 | 0.0000395 Mm.186678   |
| BC023055   | cDNA sequence BC023055                                  | 0.67 | 0.00023 Mm.259441     |
| BC023181   | cDNA sequence BC023181                                  | 0.79 | 0.006 Mm.276001       |
| BC024322   | cDNA sequence BC024322                                  | 0.78 | 0.00271 Mm.25321      |
| BC024561   | cDNA sequence BC024561                                  | 1.68 | 0.000733 Mm.10545     |
| BC024760   | cDNA sequence BC024760                                  | 0.72 | 0.0035 Mm.191491      |
| BC025586   | cDNA sequence BC025586                                  | 1.26 | 0.00905 Mm.19172      |
| BC025872   | cDNA sequence BC025872                                  | 0.75 | 0.0462 Mm.265552      |
| BC026645   | cDNA sequence BC026645                                  | 0.66 | 0.0194 Mm.153676      |
| BC031593   | cDNA sequence BC031593                                  | 0.14 | 0.000000111 Mm.162744 |
| U46068     | cDNA sequence U46068                                    | 3.14 | 0.00000474 Mm.3783    |
| D10Ert438e | DNA segment, Chr 10, ERATO Doi 438, expressed           | 1.45 | 0.0275 Mm.199964      |
| D10Ert479e | DNA segment, Chr 10, ERATO Doi 749, expressed           | 1.27 | 0.0307 Mm.62876       |
| D10Wsu93e  | DNA segment, Chr 10, Wayne State University 93, express | 0.80 | 0.0452 Mm.27443       |
| D11Wsu99e  | DNA segment, Chr 11, Wayne State University 99, express | 2.16 | 0.000147 Mm.261620    |
| D14Ert436e | DNA segment, Chr 14, ERATO Doi 436, expressed           | 0.82 | 0.0216 Mm.287279      |
| D14Ert813e | DNA segment, Chr 14, ERATO Doi 813, expressed           | 1.40 | 0.00519 Mm.29515      |
| D14Wsu89e  | DNA segment, Chr 14, Wayne State University 89, express | 1.82 | 0.0047 Mm.24477       |
| D15Wsu75e  | DNA segment, Chr 15, Wayne State University 75, express | 1.22 | 0.0246 Mm.213261      |
| D16Ert480e | DNA segment, Chr 16, ERATO Doi 480, expressed           | 0.84 | 0.0296 Mm.24035       |
| D19Wsu55e  | DNA segment, Chr 19, Wayne State University 55, express | 2.19 | 0.00012 Mm.19091      |
| D2Bwg0891e | DNA segment, Chr 2, Brigham & Women's Genetics 0891 e   | 0.80 | 0.0246 Mm.195525      |
| D4Wsu114e  | DNA segment, Chr 4, Wayne State University 114, express | 1.20 | 0.048 Mm.250504       |



|            |                                                               |      |                     |
|------------|---------------------------------------------------------------|------|---------------------|
| D4Wsu27e   | DNA segment, Chr 4, Wayne State University 27, expressed      | 1.37 | 0.00109 Mm.17917    |
| D5Ert33e   | DNA segment, Chr 5, ERATO Doi 33, expressed                   | 0.79 | 0.0275 Mm.290142    |
| D6Ert32e   | DNA segment, Chr 6, ERATO Doi 32, expressed                   | 1.37 | 0.00588 Mm.220334   |
| D6Ert349e  | DNA segment, Chr 6, ERATO Doi 349, expressed                  | 0.79 | 0.0195 Mm.196943    |
| D6Wsu116e  | DNA segment, Chr 6, Wayne State University 116, expressed     | 0.80 | 0.0405 Mm.28524     |
| D6Wsu176e  | DNA segment, Chr 6, Wayne State University 176, expressed     | 1.17 | 0.0397 Mm.258484    |
| D7Bwg0421e | DNA segment, Chr 7, Brigham & Women's Genetics 0421           | 1.30 | 0.0217 Mm.290880    |
| D7Ert458e  | DNA segment, Chr 7, ERATO Doi 458, expressed                  | 1.41 | 0.00129 Mm.227506   |
| D8Ert354e  | DNA segment, Chr 8, ERATO Doi 354, expressed                  | 1.37 | 0.0233 Mm.28326     |
| D8Ert531e  | DNA segment, Chr 8, ERATO Doi 531, expressed                  | 1.38 | 0.0117 Mm.294871    |
| D8Ert812e  | DNA segment, Chr 8, ERATO Doi 812, expressed                  | 1.27 | 0.0196 Mm.275720    |
| D9Bwg0185e | DNA segment, Chr 9, Brigham & Women's Genetics 0185 expressed | 1.59 | 0.00955 Mm.193647   |
| Nme2       | expressed in non-metastatic cells 2, protein                  | 1.38 | 0.00616 Mm.298224   |
| Nme3       | expressed in non-metastatic cells 3                           | 0.68 | 0.00782 Mm.27278    |
| AA407809   | expressed sequence AA407809                                   | 1.44 | 0.00443 Mm.280895   |
| AA409541   | expressed sequence AA409541                                   | 1.31 | 0.00453 Mm.290530   |
| AA415817   | expressed sequence AA415817                                   | 0.15 | 5.4E-10 Mm.163885   |
| AA536743   | expressed sequence AA536743                                   | 1.61 | 0.00112 Mm.243632   |
| AA959742   | expressed sequence AA959742                                   | 1.53 | 0.0069 Mm.269069    |
| AA960558   | expressed sequence AA960558                                   | 0.78 | 0.0431 Mm.227474    |
| AI325941   | expressed sequence AI325941                                   | 0.70 | 0.0217 Mm.1881      |
| AI447904   | expressed sequence AI447904                                   | 3.66 | 0.000185 Mm.447     |
| AI461653   | expressed sequence AI461653                                   | 0.73 | 0.0111 Mm.34281     |
| AI464131   | expressed sequence AI464131                                   | 0.78 | 0.00924 Mm.27054    |
| AI464239   | expressed sequence AI464239                                   | 0.76 | 0.0172 Mm.258105    |
| AI551766   | expressed sequence AI551766                                   | 0.86 | 0.0293 Mm.202715    |
| AI595338   | expressed sequence AI595338                                   | 0.46 | 0.00378 Mm.275893   |
| AI643885   | expressed sequence AI643885                                   | 1.58 | 0.00464 Mm.46749    |
| AI646725   | expressed sequence AI646725                                   | 0.82 | 0.0368 Mm.31345     |
| AI661017   | expressed sequence AI661017                                   | 1.75 | 0.0000606 Mm.132299 |
| AI836256   | expressed sequence AI836256                                   | 0.75 | 0.0297 Mm.24115     |
| AL022610   | expressed sequence AL022610                                   | 0.79 | 0.0129 Mm.27259     |
| AL024210   | expressed sequence AL024210                                   | 0.85 | 0.0414 Mm.247782    |
| AW011752   | expressed sequence AW011752                                   | 0.81 | 0.0224 Mm.276386    |
| AW060207   | expressed sequence AW060207                                   | 0.79 | 0.0215 Mm.159681    |
| AW111922   | expressed sequence AW111922                                   | 1.51 | 0.0418 Mm.261140    |
| AW494914   | expressed sequence AW494914                                   | 0.81 | 0.0479 Mm.297521    |

|               |                                 |      |                    |
|---------------|---------------------------------|------|--------------------|
| AW548124      | expressed sequence AW548124     | 0.68 | 0.000501 Mm.273209 |
| AW552001      | expressed sequence AW552001     | 0.63 | 0.00234 Mm.21175   |
| AW559096      | expressed sequence AW559096     | 0.75 | 0.0263 Mm.247837   |
| AW742319      | expressed sequence AW742319     | 0.70 | 0.0129 Mm.21092    |
| AW822216      | expressed sequence AW822216     | 0.80 | 0.0117 Mm.236454   |
| C76746        | expressed sequence C76746       | 1.34 | 0.00788 Mm.202750  |
| C80913        | expressed sequence C80913       | 1.49 | 0.000333 Mm.23997  |
| C81234        | expressed sequence C81234       | 0.63 | 0.0163 Mm.6055     |
| C85658        | expressed sequence C85658       | 0.84 | 0.0215 Mm.206631   |
| 3010020C06    | hypothetical protein 3010020C06 | 0.58 | 0.00954 Mm.249594  |
| 5930437N14    | hypothetical protein 5930437N14 | 0.73 | 0.00716 Mm.45005   |
| 6720484B16    | hypothetical protein 6720484B16 | 1.20 | 0.046 Mm.260557    |
| 9830126M18    | hypothetical protein 9830126M18 | 1.29 | 0.0309 Mm.266485   |
| D130005A03    | hypothetical protein D130005A03 | 1.44 | 0.00113 Mm.260210  |
| D930024E11    | hypothetical protein D930024E11 | 0.72 | 0.00806 Mm.258310  |
| LOC212285     | hypothetical protein LOC212285  | 0.65 | 0.00936 Mm.244403  |
| LOC217831     | hypothetical protein LOC217831  | 0.70 | 0.0194 Mm.156217   |
| LOC234344     | hypothetical protein LOC234344  | 1.50 | 0.00786 Mm.282378  |
| LOC268670     | hypothetical protein LOC268670  | 0.85 | 0.0227 Mm.56274    |
| MGC18837      | hypothetical protein MGC18837   | 0.70 | 0.0279 Mm.253329   |
| MGC29254      | hypothetical protein MGC29254   | 0.78 | 0.00788 Mm.20377   |
| MGC37938      | hypothetical protein MGC37938   | 0.76 | 0.0408 Mm.34891    |
| MGC39058      | hypothetical protein MGC39058   | 0.82 | 0.0144 Mm.168530   |
| MGC56855      | hypothetical protein MGC56855   | 1.23 | 0.0345 Mm.271910   |
| MGC6357       | hypothetical protein MGC6357    | 1.18 | 0.0382 Mm.211654   |
| 0610006O14Rik | RIKEN cDNA 0610006O14 gene      | 0.56 | 0.000522 Mm.30214  |
| 0610007L05Rik | RIKEN cDNA 0610007L05 gene      | 0.46 | 0.0000274 Mm.28231 |
| 0610007P06Rik | RIKEN cDNA 0610007P06 gene      | 0.79 | 0.0271 Mm.28679    |
| 0610011D08Rik | RIKEN cDNA 0610011D08 gene      | 1.39 | 0.006 Mm.294159    |
| 0610011I04Rik | RIKEN cDNA 0610011I04 gene      | 1.30 | 0.0116 Mm.27061    |
| 0610013D04Rik | RIKEN cDNA 0610013D04 gene      | 0.72 | 0.0157 Mm.196330   |
| 0610027O18Rik | RIKEN cDNA 0610027O18 gene      | 0.82 | 0.0167 Mm.195309   |
| 0610033L19Rik | RIKEN cDNA 0610033L19 gene      | 0.84 | 0.0227 Mm.276429   |
| 0610037M15Rik | RIKEN cDNA 0610037M15 gene      | 2.95 | 0.000343 Mm.221293 |
| 0610038P07Rik | RIKEN cDNA 0610038P07 gene      | 1.23 | 0.0377 Mm.232728   |
| 0610039K22Rik | RIKEN cDNA 0610039K22 gene      | 0.78 | 0.0201 Mm.288183   |
| 0610039N19Rik | RIKEN cDNA 0610039N19 gene      | 0.76 | 0.0109 Mm.146873   |

|               |                            |      |                     |
|---------------|----------------------------|------|---------------------|
| 0610040B21Rik | RIKEN cDNA 0610040B21 gene | 0.80 | 0.0192 Mm.159965    |
| 0610041E09Rik | RIKEN cDNA 0610041E09 gene | 1.35 | 0.00254 Mm.241387   |
| 0610041L09Rik | RIKEN cDNA 0610041L09 gene | 0.85 | 0.0459 Mm.21501     |
| 0610041O14Rik | RIKEN cDNA 0610041O14 gene | 0.82 | 0.029 Mm.23739      |
| 0610042E07Rik | RIKEN cDNA 0610042E07 gene | 1.37 | 0.00373 Mm.41385    |
| 0710001O03Rik | RIKEN cDNA 0710001O03 gene | 0.81 | 0.0258 Mm.30158     |
| 0910001A06Rik | RIKEN cDNA 0910001A06 gene | 1.38 | 0.0179 Mm.246108    |
| 1100001J08Rik | RIKEN cDNA 1100001J08 gene | 0.74 | 0.0357 Mm.249806    |
| 1110001C20Rik | RIKEN cDNA 1110001C20 gene | 1.65 | 0.0067 Mm.218889    |
| 1110001N06Rik | RIKEN cDNA 1110001N06 gene | 0.86 | 0.0227 Mm.277705    |
| 1110003B01Rik | RIKEN cDNA 1110003B01 gene | 1.46 | 0.0245 Mm.275648    |
| 1110006I11Rik | RIKEN cDNA 1110006I11 gene | 0.75 | 0.0059 Mm.156346    |
| 1110007F23Rik | RIKEN cDNA 1110007F23 gene | 0.56 | 0.0125 Mm.272278    |
| 1110012M11Rik | RIKEN cDNA 1110012M11 gene | 1.32 | 0.0166 Mm.154023    |
| 1110015E18Rik | RIKEN cDNA 1110015E18 gene | 0.81 | 0.0439 Mm.27844     |
| 1110018J12Rik | RIKEN cDNA 1110018J12 gene | 0.48 | 0.0000426 Mm.271817 |
| 1110018J18Rik | RIKEN cDNA 1110018J18 gene | 0.76 | 0.0338 Mm.227240    |
| 1110019N10Rik | RIKEN cDNA 1110019N10 gene | 0.80 | 0.0488 Mm.279       |
| 1110023P21Rik | RIKEN cDNA 1110023P21 gene | 1.40 | 0.0305 Mm.22284     |
| 1110027O12Rik | RIKEN cDNA 1110027O12 gene | 0.71 | 0.0215 Mm.195526    |
| 1110029F20Rik | RIKEN cDNA 1110029F20 gene | 0.74 | 0.0112 Mm.293605    |
| 1110032E16Rik | RIKEN cDNA 1110032E16 gene | 0.73 | 0.0136 Mm.259079    |
| 1110033A15Rik | RIKEN cDNA 1110033A15 gene | 0.80 | 0.0365 Mm.200885    |
| 1110033J19Rik | RIKEN cDNA 1110033J19 gene | 1.71 | 0.00262 Mm.3572     |
| 1110035L05Rik | RIKEN cDNA 1110035L05 gene | 1.92 | 0.00012 Mm.29140    |
| 1110035O14Rik | RIKEN cDNA 1110035O14 gene | 1.39 | 0.0146 Mm.12950     |
| 1110036E10Rik | RIKEN cDNA 1110036E10 gene | 1.53 | 0.0278 Mm.287982    |
| 1110054A24Rik | RIKEN cDNA 1110054A24 gene | 0.80 | 0.0368 Mm.287187    |
| 1110055L24Rik | RIKEN cDNA 1110055L24 gene | 1.30 | 0.0106 Mm.227281    |
| 1110063G11Rik | RIKEN cDNA 1110063G11 gene | 0.54 | 0.000693 Mm.273785  |
| 1190002H23Rik | RIKEN cDNA 1190002H23 gene | 1.87 | 0.00464 Mm.29811    |
| 1190002N15Rik | RIKEN cDNA 1190002N15 gene | 0.76 | 0.0394 Mm.258746    |
| 1190003K14Rik | RIKEN cDNA 1190003K14 gene | 1.94 | 0.0128 Mm.292848    |
| 1200002M06Rik | RIKEN cDNA 1200002M06 gene | 0.66 | 0.000299 Mm.292503  |
| 1200003C23Rik | RIKEN cDNA 1200003C23 gene | 0.43 | 0.0000744 Mm.280563 |
| 1200008D14Rik | RIKEN cDNA 1200008D14 gene | 0.78 | 0.0267 Mm.2252      |
| 1200009O22Rik | RIKEN cDNA 1200009O22 gene | 0.54 | 0.0000317 Mm.41187  |

|               |                            |      |                       |
|---------------|----------------------------|------|-----------------------|
| 1200010C09Rik | RIKEN cDNA 1200010C09 gene | 0.80 | 0.0259 Mm.149870      |
| 1200011D03Rik | RIKEN cDNA 1200011D03 gene | 0.54 | 0.0208 Mm.20108       |
| 1200013I08Rik | RIKEN cDNA 1200013I08 gene | 0.80 | 0.03 Mm.26696         |
| 1200015A22Rik | RIKEN cDNA 1200015A22 gene | 1.22 | 0.0354 Mm.38801       |
| 1200020A08Rik | RIKEN cDNA 1200020A08 gene | 1.16 | 0.0258 Mm.109329      |
| 1300003P13Rik | RIKEN cDNA 1300003P13 gene | 1.60 | 0.000136 Mm.28654     |
| 1300006C19Rik | RIKEN cDNA 1300006C19 gene | 1.37 | 0.00284 Mm.296158     |
| 1300006M19Rik | RIKEN cDNA 1300006M19 gene | 0.19 | 3.68E-09 Mm.18814     |
| 1300008B03Rik | RIKEN cDNA 1300008B03 gene | 1.63 | 0.0326 Mm.326175      |
| 1500001L15Rik | RIKEN cDNA 1500001L15 gene | 2.11 | 0.00012 Mm.21214      |
| 1500001M02Rik | RIKEN cDNA 1500001M02 gene | 0.76 | 0.00766 Mm.261329     |
| 1500005G05Rik | RIKEN cDNA 1500005G05 gene | 0.73 | 0.0131 Mm.280230      |
| 1500012D09Rik | RIKEN cDNA 1500012D09 gene | 0.69 | 0.000369 Mm.32870     |
| 1500015O10Rik | RIKEN cDNA 1500015O10 gene | 1.26 | 0.00891 Mm.274301     |
| 1500016H10Rik | RIKEN cDNA 1500016H10 gene | 1.25 | 0.0312 Mm.218533      |
| 1500026D16Rik | RIKEN cDNA 1500026D16 gene | 1.25 | 0.0252 Mm.246200      |
| 1600012H06Rik | RIKEN cDNA 1600012H06 gene | 1.20 | 0.0249 Mm.28544       |
| 1600025H15Rik | RIKEN cDNA 1600025H15 gene | 0.78 | 0.0312 Mm.276829      |
| 1600029D21Rik | RIKEN cDNA 1600029D21 gene | 0.59 | 0.0165 Mm.29959       |
| 1700001E16Rik | RIKEN cDNA 1700001E16 gene | 0.77 | 0.0179 Mm.229110      |
| 1700009P13Rik | RIKEN cDNA 1700009P13 gene | 0.84 | 0.0176 Mm.296565      |
| 1700012G19Rik | RIKEN cDNA 1700012G19 gene | 1.28 | 0.00617 Mm.28541      |
| 1700017B05Rik | RIKEN cDNA 1700017B05 gene | 1.54 | 0.00269 Mm.22712      |
| 1700019G17Rik | RIKEN cDNA 1700019G17 gene | 0.86 | 0.044 Mm.24454        |
| 1700020E22Rik | RIKEN cDNA 1700020E22 gene | 0.59 | 0.0148 Mm.293635      |
| 1700022C21Rik | RIKEN cDNA 1700022C21 gene | 0.83 | 0.0333 Mm.26684       |
| 1700029I01Rik | RIKEN cDNA 1700029I01 gene | 2.16 | 0.000000656 Mm.299127 |
| 1700030A21Rik | RIKEN cDNA 1700030A21 gene | 1.17 | 0.0422 Mm.25661       |
| 1700060H10Rik | RIKEN cDNA 1700060H10 gene | 0.77 | 0.0216 Mm.245111      |
| 1700127B04Rik | RIKEN cDNA 1700127B04 gene | 1.34 | 0.00828 Mm.218639     |
| 1810003N24Rik | RIKEN cDNA 1810003N24 gene | 1.23 | 0.0422 Mm.27831       |
| 1810007E14Rik | RIKEN cDNA 1810007E14 gene | 1.37 | 0.0245 Mm.36777       |
| 1810008K03Rik | RIKEN cDNA 1810008K03 gene | 0.80 | 0.0136 Mm.35083       |
| 1810009K13Rik | RIKEN cDNA 1810009K13 gene | 1.17 | 0.0219 Mm.263319      |
| 1810012N01Rik | RIKEN cDNA 1810012N01 gene | 1.16 | 0.0232 Mm.23951       |
| 1810013B01Rik | RIKEN cDNA 1810013B01 gene | 0.82 | 0.0407 Mm.24806       |
| 1810017G16Rik | RIKEN cDNA 1810017G16 gene | 0.68 | 0.0243 Mm.38746       |

|               |                            |      |                    |
|---------------|----------------------------|------|--------------------|
| 1810019P04Rik | RIKEN cDNA 1810019P04 gene | 1.19 | 0.0495 Mm.234876   |
| 1810020C19Rik | RIKEN cDNA 1810020C19 gene | 1.71 | 0.00947 Mm.272498  |
| 1810020E01Rik | RIKEN cDNA 1810020E01 gene | 1.20 | 0.0355 Mm.28963    |
| 1810030I22Rik | RIKEN cDNA 1810030I22 gene | 0.80 | 0.0256 Mm.301346   |
| 1810030O07Rik | RIKEN cDNA 1810030O07 gene | 0.79 | 0.0312 Mm.15974    |
| 1810034M08Rik | RIKEN cDNA 1810034M08 gene | 0.87 | 0.0354 Mm.218434   |
| 1810045K07Rik | RIKEN cDNA 1810045K07 gene | 1.23 | 0.0229 Mm.290353   |
| 1810045K17Rik | RIKEN cDNA 1810045K17 gene | 1.17 | 0.0417 Mm.28917    |
| 1810046I24Rik | RIKEN cDNA 1810046I24 gene | 1.35 | 0.0117 Mm.289642   |
| 1810054D07Rik | RIKEN cDNA 1810054D07 gene | 1.27 | 0.0191 Mm.5540     |
| 1810057C19Rik | RIKEN cDNA 1810057C19 gene | 0.54 | 0.00772 Mm.212428  |
| 1810073M23Rik | RIKEN cDNA 1810073M23 gene | 1.18 | 0.0498 Mm.246440   |
| 1810074D23Rik | RIKEN cDNA 1810074D23 gene | 1.24 | 0.00993 Mm.193089  |
| 2010004N24Rik | RIKEN cDNA 2010004N24 gene | 1.33 | 0.00559 Mm.280459  |
| 2010005A06Rik | RIKEN cDNA 2010005A06 gene | 0.78 | 0.0134 Mm.36560    |
| 2010106G01Rik | RIKEN cDNA 2010106G01 gene | 1.57 | 0.0341 Mm.269928   |
| 2010107G23Rik | RIKEN cDNA 2010107G23 gene | 0.63 | 0.000472 Mm.294126 |
| 2010107K19Rik | RIKEN cDNA 2010107K19 gene | 1.27 | 0.0128 Mm.46317    |
| 2010110K24Rik | RIKEN cDNA 2010110K24 gene | 1.37 | 0.00155 Mm.218423  |
| 2010305C02Rik | RIKEN cDNA 2010305C02 gene | 0.60 | 0.000263 Mm.41393  |
| 2010308M01Rik | RIKEN cDNA 2010308M01 gene | 0.84 | 0.0451 Mm.30511    |
| 2010317E03Rik | RIKEN cDNA 2010317E03 gene | 1.39 | 0.0288 Mm.250567   |
| 2010319C14Rik | RIKEN cDNA 2010319C14 gene | 1.33 | 0.00495 Mm.37613   |
| 2210021G21Rik | RIKEN cDNA 2210021G21 gene | 0.82 | 0.0202 Mm.32883    |
| 2210022F10Rik | RIKEN cDNA 2210022F10 gene | 0.78 | 0.0275 Mm.132226   |
| 2210022N24Rik | RIKEN cDNA 2210022N24 gene | 0.78 | 0.0136 Mm.293565   |
| 2210023F24Rik | RIKEN cDNA 2210023F24 gene | 0.84 | 0.0457 Mm.5510     |
| 2210023G05Rik | RIKEN cDNA 2210023G05 gene | 0.67 | 0.003 Mm.26580     |
| 2210402C18Rik | RIKEN cDNA 2210402C18 gene | 0.67 | 0.00133 Mm.19119   |
| 2210404N08Rik | RIKEN cDNA 2210404N08 gene | 0.52 | 0.00347 Mm.34874   |
| 2210412K09Rik | RIKEN cDNA 2210412K09 gene | 0.84 | 0.047 Mm.212763    |
| 2210417C17Rik | RIKEN cDNA 2210417C17 gene | 1.35 | 0.0179 Mm.28013    |
| 2210418I02Rik | RIKEN cDNA 2210418I02 gene | 2.01 | 0.0000726 Mm.73682 |
| 2300002F06Rik | RIKEN cDNA 2300002F06 gene | 0.81 | 0.0266 Mm.301373   |
| 2310003F16Rik | RIKEN cDNA 2310003F16 gene | 0.82 | 0.013 Mm.24220     |
| 2310006I24Rik | RIKEN cDNA 2310006I24 gene | 0.77 | 0.0179 Mm.29200    |
| 2310008M14Rik | RIKEN cDNA 2310008M14 gene | 0.85 | 0.0334 Mm.259467   |

|               |                            |      |                      |
|---------------|----------------------------|------|----------------------|
| 2310009E04Rik | RIKEN cDNA 2310009E04 gene | 0.75 | 0.00235 Mm.276098    |
| 2310014B11Rik | RIKEN cDNA 2310014B11 gene | 0.75 | 0.00524 Mm.275266    |
| 2310014H01Rik | RIKEN cDNA 2310014H01 gene | 1.21 | 0.0122 Mm.218511     |
| 2310015I10Rik | RIKEN cDNA 2310015I10 gene | 1.52 | 0.0479 Mm.260325     |
| 2310016C08Rik | RIKEN cDNA 2310016C08 gene | 0.61 | 0.0016 Mm.45161      |
| 2310020H20Rik | RIKEN cDNA 2310020H20 gene | 0.76 | 0.00269 Mm.29497     |
| 2310020L09Rik | RIKEN cDNA 2310020L09 gene | 1.37 | 0.00146 Mm.29293     |
| 2310021M12Rik | RIKEN cDNA 2310021M12 gene | 0.68 | 0.000369 Mm.142343   |
| 2310022K01Rik | RIKEN cDNA 2310022K01 gene | 0.86 | 0.0365 Mm.290410     |
| 2310036D22Rik | RIKEN cDNA 2310036D22 gene | 1.42 | 0.0308 Mm.27742      |
| 2310040G17Rik | RIKEN cDNA 2310040G17 gene | 0.72 | 0.00024 Mm.268156    |
| 2310042G06Rik | RIKEN cDNA 2310042G06 gene | 1.20 | 0.0437 Mm.182294     |
| 2310045A20Rik | RIKEN cDNA 2310045A20 gene | 1.24 | 0.00816 Mm.235020    |
| 2310046G15Rik | RIKEN cDNA 2310046G15 gene | 0.73 | 0.0368 Mm.250438     |
| 2310047I15Rik | RIKEN cDNA 2310047I15 gene | 0.67 | 0.00218 Mm.236878    |
| 2310061A22Rik | RIKEN cDNA 2310061A22 gene | 1.41 | 0.0448 Mm.3676       |
| 2310066P17Rik | RIKEN cDNA 2310066P17 gene | 0.73 | 0.00584 Mm.289427    |
| 2310076K21Rik | RIKEN cDNA 2310076K21 gene | 1.82 | 0.00113 Mm.277533    |
| 2400004E04Rik | RIKEN cDNA 2400004E04 gene | 0.73 | 0.0193 Mm.7124       |
| 2400006A19Rik | RIKEN cDNA 2400006A19 gene | 2.87 | 0.000000126 Mm.27591 |
| 2400009B11Rik | RIKEN cDNA 2400009B11 gene | 0.83 | 0.0493 Mm.21202      |
| 2400010D15Rik | RIKEN cDNA 2400010D15 gene | 1.67 | 0.00544 Mm.196596    |
| 2410002K23Rik | RIKEN cDNA 2410002K23 gene | 0.83 | 0.0401 Mm.123366     |
| 2410002O22Rik | RIKEN cDNA 2410002O22 gene | 1.44 | 0.0099 Mm.272541     |
| 2410011G03Rik | RIKEN cDNA 2410011G03 gene | 1.93 | 0.00000369 Mm.27886  |
| 2410011K10Rik | RIKEN cDNA 2410011K10 gene | 0.80 | 0.0312 Mm.273285     |
| 2410012M04Rik | RIKEN cDNA 2410012M04 gene | 1.22 | 0.0324 Mm.5915       |
| 2410018C20Rik | RIKEN cDNA 2410018C20 gene | 1.21 | 0.041 Mm.281473      |
| 2410018G23Rik | RIKEN cDNA 2410018G23 gene | 2.43 | 0.000228 Mm.28626    |
| 2410043F08Rik | RIKEN cDNA 2410043F08 gene | 1.53 | 0.00185 Mm.286536    |
| 2410046H15Rik | RIKEN cDNA 2410046H15 gene | 0.78 | 0.0131 Mm.282888     |
| 2410153K17Rik | RIKEN cDNA 2410153K17 gene | 0.78 | 0.0127 Mm.232789     |
| 2500002K03Rik | RIKEN cDNA 2500002K03 gene | 1.22 | 0.0432 Mm.29181      |
| 2510009N07Rik | RIKEN cDNA 2510009N07 gene | 0.79 | 0.0246 Mm.29087      |
| 2510010F15Rik | RIKEN cDNA 2510010F15 gene | 1.23 | 0.0188 Mm.183368     |
| 2510025K24Rik | RIKEN cDNA 2510025K24 gene | 0.72 | 0.0354 Mm.87456      |
| 2510049I19Rik | RIKEN cDNA 2510049I19 gene | 0.69 | 0.000828 Mm.28327    |

|               |                            |      |                     |
|---------------|----------------------------|------|---------------------|
| 2600013G09Rik | RIKEN cDNA 2600013G09 gene | 1.37 | 0.0158 Mm.30191     |
| 2610001E17Rik | RIKEN cDNA 2610001E17 gene | 1.47 | 0.0152 Mm.181074    |
| 2610002J02Rik | RIKEN cDNA 2610002J02 gene | 1.21 | 0.0287 Mm.10374     |
| 2610016C12Rik | RIKEN cDNA 2610016C12 gene | 1.19 | 0.0247 Mm.41775     |
| 2610019F03Rik | RIKEN cDNA 2610019F03 gene | 0.79 | 0.026 Mm.5727       |
| 2610020H15Rik | RIKEN cDNA 2610020H15 gene | 1.90 | 0.000123 Mm.281887  |
| 2610024A01Rik | RIKEN cDNA 2610024A01 gene | 0.68 | 0.0238 Mm.281287    |
| 2610036D13Rik | RIKEN cDNA 2610036D13 gene | 0.78 | 0.00302 Mm.29068    |
| 2610042N09Rik | RIKEN cDNA 2610042N09 gene | 0.37 | 0.0000418 Mm.248647 |
| 2610042O14Rik | RIKEN cDNA 2610042O14 gene | 1.18 | 0.0498 Mm.44218     |
| 2610102K23Rik | RIKEN cDNA 2610102K23 gene | 1.25 | 0.0317 Mm.294783    |
| 2610102M01Rik | RIKEN cDNA 2610102M01 gene | 0.73 | 0.0316 Mm.21485     |
| 2610103J23Rik | RIKEN cDNA 2610103J23 gene | 1.36 | 0.0491 Mm.288982    |
| 2610209L14Rik | RIKEN cDNA 2610209L14 gene | 0.53 | 0.0128 Mm.268103    |
| 2610301B20Rik | RIKEN cDNA 2610301B20 gene | 1.28 | 0.000812 Mm.23962   |
| 2610311I19Rik | RIKEN cDNA 2610311I19 gene | 1.32 | 0.0237 Mm.270382    |
| 2610318G18Rik | RIKEN cDNA 2610318G18 gene | 0.85 | 0.0297 Mm.290488    |
| 2610318K02Rik | RIKEN cDNA 2610318K02 gene | 0.82 | 0.0213 Mm.220942    |
| 2610510B01Rik | RIKEN cDNA 2610510B01 gene | 0.71 | 0.0448 Mm.23230     |
| 2610510D13Rik | RIKEN cDNA 2610510D13 gene | 0.69 | 0.0103 Mm.268185    |
| 2610528J11Rik | RIKEN cDNA 2610528J11 gene | 0.81 | 0.0466 Mm.34431     |
| 2700002L06Rik | RIKEN cDNA 2700002L06 gene | 1.26 | 0.0213 Mm.232293    |
| 2700007P21Rik | RIKEN cDNA 2700007P21 gene | 0.81 | 0.0299 Mm.268092    |
| 2700038L12Rik | RIKEN cDNA 2700038L12 gene | 0.82 | 0.0378 Mm.245683    |
| 2700049B16Rik | RIKEN cDNA 2700049B16 gene | 1.24 | 0.0464 Mm.64790     |
| 2700055K07Rik | RIKEN cDNA 2700055K07 gene | 0.61 | 0.0128 Mm.29358     |
| 2700063A19Rik | RIKEN cDNA 2700063A19 gene | 0.65 | 0.00121 Mm.291752   |
| 2700075B01Rik | RIKEN cDNA 2700075B01 gene | 0.84 | 0.0259 Mm.108596    |
| 2700082D03Rik | RIKEN cDNA 2700082D03 gene | 0.81 | 0.0403 Mm.259121    |
| 2810002E22Rik | RIKEN cDNA 2810002E22 gene | 1.35 | 0.0115 Mm.211535    |
| 2810011M08Rik | RIKEN cDNA 2810011M08 gene | 0.79 | 0.0208 Mm.239675    |
| 2810024B22Rik | RIKEN cDNA 2810024B22 gene | 1.76 | 0.000199 Mm.273836  |
| 2810025M15Rik | RIKEN cDNA 2810025M15 gene | 0.77 | 0.0123 Mm.286863    |
| 2810036M19Rik | RIKEN cDNA 2810036M19 gene | 1.72 | 0.0023 Mm.34776     |
| 2810406K24Rik | RIKEN cDNA 2810406K24 gene | 0.79 | 0.0369 Mm.18589     |
| 2810413N20Rik | RIKEN cDNA 2810413N20 gene | 0.80 | 0.00628 Mm.292720   |
| 2810417H13Rik | RIKEN cDNA 2810417H13 gene | 1.42 | 0.0326 Mm.269025    |

|               |                            |      |                    |
|---------------|----------------------------|------|--------------------|
| 2810423G08Rik | RIKEN cDNA 2810423G08 gene | 0.75 | 0.00909 Mm.265007  |
| 2810428F02Rik | RIKEN cDNA 2810428F02 gene | 1.20 | 0.031 Mm.29647     |
| 2810432L12Rik | RIKEN cDNA 2810432L12 gene | 0.72 | 0.00759 Mm.24564   |
| 2810435D12Rik | RIKEN cDNA 2810435D12 gene | 0.59 | 0.0000657 Mm.41506 |
| 2810439F02Rik | RIKEN cDNA 2810439F02 gene | 1.39 | 0.0136 Mm.52526    |
| 2810453I06Rik | RIKEN cDNA 2810453I06 gene | 0.65 | 0.00324 Mm.290816  |
| 2900008M13Rik | RIKEN cDNA 2900008M13 gene | 1.25 | 0.0142 Mm.86933    |
| 2900027G03Rik | RIKEN cDNA 2900027G03 gene | 0.73 | 0.00364 Mm.301367  |
| 2900084M01Rik | RIKEN cDNA 2900084M01 gene | 0.83 | 0.0345 Mm.185413   |
| 3010001K23Rik | RIKEN cDNA 3010001K23 gene | 0.83 | 0.0452 Mm.258324   |
| 3010033I09Rik | RIKEN cDNA 3010033I09 gene | 0.63 | 0.00643 Mm.289674  |
| 3010033P07Rik | RIKEN cDNA 3010033P07 gene | 6.50 | 4.43E-08 Mm.13944  |
| 3100002M17Rik | RIKEN cDNA 3100002M17 gene | 0.85 | 0.0298 Mm.26017    |
| 3110004L20Rik | RIKEN cDNA 3110004L20 gene | 0.65 | 0.0017 Mm.23932    |
| 3110009E18Rik | RIKEN cDNA 3110009E18 gene | 0.81 | 0.0162 Mm.271602   |
| 3110017O03Rik | RIKEN cDNA 3110017O03 gene | 1.21 | 0.0217 Mm.41779    |
| 3110038L01Rik | RIKEN cDNA 3110038L01 gene | 0.69 | 0.0372 Mm.29429    |
| 3110043J09Rik | RIKEN cDNA 3110043J09 gene | 1.22 | 0.031 Mm.128411    |
| 3110052N05Rik | RIKEN cDNA 3110052N05 gene | 1.29 | 0.00718 Mm.236127  |
| 3110065C23Rik | RIKEN cDNA 3110065C23 gene | 1.30 | 0.0196 Mm.234757   |
| 3110070M22Rik | RIKEN cDNA 3110070M22 gene | 1.99 | 0.000113 Mm.46679  |
| 3200002M19Rik | RIKEN cDNA 3200002M19 gene | 1.24 | 0.0301 Mm.284491   |
| 3300001H21Rik | RIKEN cDNA 3300001H21 gene | 0.78 | 0.00775 Mm.220975  |
| 3632451O06Rik | RIKEN cDNA 3632451O06 gene | 0.87 | 0.0301 Mm.282412   |
| 3732409C05Rik | RIKEN cDNA 3732409C05 gene | 1.75 | 0.0124 Mm.206919   |
| 3830408P04Rik | RIKEN cDNA 3830408P04 gene | 1.68 | 0.00203 Mm.12912   |
| 3830421F13Rik | RIKEN cDNA 3830421F13 gene | 1.45 | 0.018 Mm.253042    |
| 3830613O22Rik | RIKEN cDNA 3830613O22 gene | 0.69 | 0.0388 Mm.272974   |
| 4632413K17Rik | RIKEN cDNA 4632413K17 gene | 1.21 | 0.0189 Mm.295246   |
| 4632415L05Rik | RIKEN cDNA 4632415L05 gene | 0.83 | 0.0269 Mm.37735    |
| 4732429D16Rik | RIKEN cDNA 4732429D16 gene | 1.21 | 0.0312 Mm.294107   |
| 4732435N03Rik | RIKEN cDNA 4732435N03 gene | 1.36 | 0.00971 Mm.116889  |
| 4732452J19Rik | RIKEN cDNA 4732452J19 gene | 0.78 | 0.0416 Mm.87252    |
| 4732486I23Rik | RIKEN cDNA 4732486I23 gene | 1.63 | 0.000538 Mm.34850  |
| 4832415H08Rik | RIKEN cDNA 4832415H08 gene | 1.23 | 0.0345 Mm.287131   |
| 4833417L20Rik | RIKEN cDNA 4833417L20 gene | 1.53 | 0.0115 Mm.196382   |
| 4833420G17Rik | RIKEN cDNA 4833420G17 gene | 1.64 | 0.000267 Mm.9860   |



|               |                            |      |                     |
|---------------|----------------------------|------|---------------------|
| 4833420K19Rik | RIKEN cDNA 4833420K19 gene | 1.28 | 0.0359 Mm.27293     |
| 4921525H23Rik | RIKEN cDNA 4921525H23 gene | 0.79 | 0.0226 Mm.27123     |
| 4921528E07Rik | RIKEN cDNA 4921528E07 gene | 1.60 | 0.0000744 Mm.121918 |
| 4930403J22Rik | RIKEN cDNA 4930403J22 gene | 0.86 | 0.031 Mm.271988     |
| 4930422J18Rik | RIKEN cDNA 4930422J18 gene | 2.04 | 0.00043 Mm.30       |
| 4930449E07Rik | RIKEN cDNA 4930449E07 gene | 1.31 | 0.0124 Mm.133570    |
| 4930451A13Rik | RIKEN cDNA 4930451A13 gene | 0.73 | 0.00103 Mm.257819   |
| 4930472G13Rik | RIKEN cDNA 4930472G13 gene | 1.47 | 0.00131 Mm.127692   |
| 4930488L10Rik | RIKEN cDNA 4930488L10 gene | 0.78 | 0.00293 Mm.2962     |
| 4930511A21Rik | RIKEN cDNA 4930511A21 gene | 1.25 | 0.00505 Mm.12848    |
| 4930524H12Rik | RIKEN cDNA 4930524H12 gene | 1.23 | 0.0136 Mm.29830     |
| 4930526B11Rik | RIKEN cDNA 4930526B11 gene | 0.78 | 0.00802 Mm.179267   |
| 4930534K13Rik | RIKEN cDNA 4930534K13 gene | 1.21 | 0.027 Mm.259672     |
| 4930544L10Rik | RIKEN cDNA 4930544L10 gene | 0.83 | 0.0334 Mm.235366    |
| 4930548G07Rik | RIKEN cDNA 4930548G07 gene | 0.80 | 0.0128 Mm.152466    |
| 4930565N07Rik | RIKEN cDNA 4930565N07 gene | 0.86 | 0.0283 Mm.295918    |
| 4930570C03Rik | RIKEN cDNA 4930570C03 gene | 0.81 | 0.0245 Mm.28955     |
| 4930579A11Rik | RIKEN cDNA 4930579A11 gene | 1.34 | 0.0448 Mm.243797    |
| 4930586I02Rik | RIKEN cDNA 4930586I02 gene | 0.83 | 0.0286 Mm.127378    |
| 4931428D14Rik | RIKEN cDNA 4931428D14 gene | 1.23 | 0.0254 Mm.128663    |
| 4932416N17Rik | RIKEN cDNA 4932416N17 gene | 0.68 | 0.00022 Mm.159176   |
| 4932432K03Rik | RIKEN cDNA 4932432K03 gene | 0.75 | 0.0112 Mm.252040    |
| 4933402K05Rik | RIKEN cDNA 4933402K05 gene | 1.64 | 0.017 Mm.259801     |
| 4933412D19Rik | RIKEN cDNA 4933412D19 gene | 0.73 | 0.0014 Mm.46722     |
| 4933425C05Rik | RIKEN cDNA 4933425C05 gene | 0.84 | 0.0494 Mm.87449     |
| 4933433D23Rik | RIKEN cDNA 4933433D23 gene | 1.37 | 0.0158 Mm.46067     |
| 5430413I02Ri  | RIKEN cDNA 5430413I02 gene | 1.43 | 0.0169 Mm.23776     |
| 5430435G22Rik | RIKEN cDNA 5430435G22 gene | 1.47 | 0.00117 Mm.44508    |
| 5530401C11Rik | RIKEN cDNA 5530401C11 gene | 0.78 | 0.0227 Mm.28507     |
| 5630400A09Rik | RIKEN cDNA 5630400A09 gene | 1.45 | 0.0039 Mm.9210      |
| 5730403B10Rik | RIKEN cDNA 5730403B10 gene | 0.84 | 0.0479 Mm.272866    |
| 5730408C10Rik | RIKEN cDNA 5730408C10 gene | 0.66 | 0.0108 Mm.267395    |
| 5730421E18Rik | RIKEN cDNA 5730421E18 gene | 0.71 | 0.00581 Mm.283342   |
| 5730442A20Rik | RIKEN cDNA 5730442A20 gene | 1.34 | 0.0415 Mm.22421     |
| 5730442K12Rik | RIKEN cDNA 5730442K12 gene | 0.68 | 0.00207 Mm.22758    |
| 5730494M16Rik | RIKEN cDNA 5730494M16 gene | 1.20 | 0.0124 Mm.263189    |
| 5730536A07Rik | RIKEN cDNA 5730536A07 gene | 1.25 | 0.022 Mm.27107      |

|               |                            |      |                     |
|---------------|----------------------------|------|---------------------|
| 5830400N10Rik | RIKEN cDNA 5830400N10 gene | 1.74 | 0.000126 Mm.240252  |
| 5830404H04Rik | RIKEN cDNA 5830404H04 gene | 0.84 | 0.0244 Mm.1465      |
| 5830413E08Rik | RIKEN cDNA 5830413E08 gene | 1.99 | 0.00139 Mm.21697    |
| 5830417I10Rik | RIKEN cDNA 5830417I10 gene | 0.77 | 0.00406 Mm.126870   |
| 5830426I05Rik | RIKEN cDNA 5830426I05 gene | 1.36 | 0.0132 Mm.21516     |
| 5830446M03Rik | RIKEN cDNA 5830446M03 gene | 0.85 | 0.0175 Mm.28916     |
| 6030411F23Rik | RIKEN cDNA 6030411F23 gene | 1.36 | 0.000581 Mm.5356    |
| 6030432N09Rik | RIKEN cDNA 6030432N09 gene | 0.69 | 0.000722 Mm.247039  |
| 6030458C11Rik | RIKEN cDNA 6030458C11 gene | 0.60 | 0.0000657 Mm.207311 |
| 6230410J09Rik | RIKEN cDNA 6230410J09 gene | 0.85 | 0.0371 Mm.280929    |
| 6330406I15Rik | RIKEN cDNA 6330406I15 gene | 1.90 | 0.0326 Mm.63262     |
| 6430517J16Rik | RIKEN cDNA 6430517J16 gene | 1.25 | 0.0167 Mm.248559    |
| 6720480D16Rik | RIKEN cDNA 6720480D16 gene | 0.81 | 0.0451 Mm.296036    |
| 7420700H20Rik | RIKEN cDNA 7420700H20 gene | 0.74 | 0.0183 Mm.7381      |
| 8030466O12Rik | RIKEN cDNA 8030466O12 gene | 0.83 | 0.0492 Mm.297097    |
| 8430419L09Rik | RIKEN cDNA 8430419L09 gene | 0.79 | 0.00567 Mm.34182    |
| 8430420C20Rik | RIKEN cDNA 8430420C20 gene | 1.24 | 0.0244 Mm.257952    |
| 9030408N13Rik | RIKEN cDNA 9030408N13 gene | 1.47 | 0.00148 Mm.31056    |
| 9030409G11Rik | RIKEN cDNA 9030409G11 gene | 1.28 | 0.0447 Mm.281393    |
| 9030425C21Rik | RIKEN cDNA 9030425C21 gene | 0.77 | 0.00993 Mm.171334   |
| 9130011B11Rik | RIKEN cDNA 9130011B11 gene | 1.40 | 0.00139 Mm.251196   |
| 9130017L10Rik | RIKEN cDNA 9130017L10 gene | 1.53 | 0.0101 Mm.283495    |
| 9130020G10Rik | RIKEN cDNA 9130020G10 gene | 0.69 | 0.0049 Mm.252312    |
| 9130221H12Rik | RIKEN cDNA 9130221H12 gene | 0.82 | 0.0176 Mm.294664    |
| 9130410M22Rik | RIKEN cDNA 9130410M22 gene | 0.75 | 0.0218 Mm.24670     |
| 9130417A21Rik | RIKEN cDNA 9130417A21 gene | 2.51 | 0.0000744 Mm.24163  |
| 9130422G05Rik | RIKEN cDNA 9130422G05 gene | 1.37 | 0.0125 Mm.252239    |
| 9330161F08Rik | RIKEN cDNA 9330161F08 gene | 0.79 | 0.0067 Mm.258402    |
| 9430015G10Rik | RIKEN cDNA 9430015G10 gene | 0.82 | 0.0157 Mm.68999     |
| 9430059P22Rik | RIKEN cDNA 9430059P22 gene | 0.78 | 0.00109 Mm.275409   |
| 9430077D24Rik | RIKEN cDNA 9430077D24 gene | 1.44 | 0.00774 Mm.265125   |
| 9430079M16Rik | RIKEN cDNA 9430079M16 gene | 0.82 | 0.0433 Mm.21814     |
| 9430083G14Rik | RIKEN cDNA 9430083G14 gene | 0.80 | 0.0104 Mm.161014    |
| 9430098E02Rik | RIKEN cDNA 9430098E02 gene | 0.55 | 0.00000369 Mm.29321 |
| 9530046H09Rik | RIKEN cDNA 9530046H09 gene | 0.76 | 0.00443 Mm.74362    |
| 9930104E21Rik | RIKEN cDNA 9930104E21 gene | 1.24 | 0.0317 Mm.154275    |
| A230046K03Rik | RIKEN cDNA A230046K03 gene | 1.38 | 0.0308 Mm.278577    |

|               |                            |      |                    |
|---------------|----------------------------|------|--------------------|
| A230103N10Rik | RIKEN cDNA A230103N10 gene | 1.25 | 0.0263 Mm.247113   |
| A430103C15Rik | RIKEN cDNA A430103C15 gene | 2.22 | 0.000361 Mm.193094 |
| A530016L24Rik | RIKEN cDNA A530016L24 gene | 0.83 | 0.0409 Mm.185209   |
| A530088I07Rik | RIKEN cDNA A530088I07 gene | 0.54 | 0.0347 Mm.121705   |
| A530089I17Rik | RIKEN cDNA A530089I17 gene | 1.36 | 0.00318 Mm.277242  |
| A530090O15Rik | RIKEN cDNA A530090O15 gene | 1.25 | 0.00505 Mm.40298   |
| A630065K24Rik | RIKEN cDNA A630065K24 gene | 1.51 | 0.00982 Mm.39723   |
| A730011O11Rik | RIKEN cDNA A730011O11 gene | 0.75 | 0.00341 Mm.29786   |
| A830007P12Rik | RIKEN cDNA A830007P12 gene | 0.76 | 0.0263 Mm.119747   |
| A830023I12Rik | RIKEN cDNA A830023I12 gene | 0.78 | 0.0217 Mm.193122   |
| A830073O21Rik | RIKEN cDNA A830073O21 gene | 0.74 | 0.0371 Mm.222728   |
| A930001N09Rik | RIKEN cDNA A930001N09 gene | 0.65 | 0.00127 Mm.275414  |
| A930009M04Rik | RIKEN cDNA A930009M04 gene | 1.55 | 0.023 Mm.219675    |
| A930018B01Rik | RIKEN cDNA A930018B01 gene | 0.84 | 0.00906 Mm.266328  |
| A930025J12Rik | RIKEN cDNA A930025J12 gene | 0.26 | 1.35E-08 Mm.260712 |
| A930037G23Rik | RIKEN cDNA A930037G23 gene | 0.87 | 0.0491 Mm.258909   |
| A930040G15Rik | RIKEN cDNA A930040G15 gene | 0.84 | 0.0128 Mm.107646   |
| B130024L21Rik | RIKEN cDNA B130024L21 gene | 1.33 | 0.00173 Mm.1960    |
| B230379M23Rik | RIKEN cDNA B230379M23 gene | 0.86 | 0.0383 Mm.35108    |
| B430218L07Rik | RIKEN cDNA B430218L07 gene | 1.27 | 0.00891 Mm.151962  |
| C030018L16Rik | RIKEN cDNA C030018L16 gene | 0.84 | 0.0467 Mm.288739   |
| C030019F02Rik | RIKEN cDNA C030019F02 gene | 0.81 | 0.0263 Mm.40361    |
| C130058N24Rik | RIKEN cDNA C130058N24 gene | 1.29 | 0.0158 Mm.44135    |
| C130076O07Rik | RIKEN cDNA C130076O07 gene | 1.42 | 0.0479 Mm.208439   |
| C330016O16Rik | RIKEN cDNA C330016O16 gene | 0.64 | 0.000106 Mm.156227 |
| C530046L02Rik | RIKEN cDNA C530046L02 gene | 1.22 | 0.0127 Mm.74587    |
| C630002M10Rik | RIKEN cDNA C630002M10 gene | 1.33 | 0.0123 Mm.262328   |
| C730049F20Rik | RIKEN cDNA C730049F20 gene | 1.27 | 0.0363 Mm.202665   |
| C820004H04Rik | RIKEN cDNA C820004H04 gene | 1.92 | 0.00214 Mm.297530  |
| D430024K22Rik | RIKEN cDNA D430024K22 gene | 1.36 | 0.00497 Mm.34316   |
| D430025H09Rik | RIKEN cDNA D430025H09 gene | 0.72 | 0.03 Mm.269413     |
| D930038M13Rik | RIKEN cDNA D930038M13 gene | 0.50 | 0.00966 Mm.209236  |
| E030006K04Rik | RIKEN cDNA E030006K04 gene | 1.91 | 0.00229 Mm.247642  |
| E030025D05Rik | RIKEN cDNA E030025D05 gene | 0.59 | 0.00269 Mm.93759   |
| E030027H19Rik | RIKEN cDNA E030027H19 gene | 1.22 | 0.0424 Mm.27519    |
| E130304C20Rik | RIKEN cDNA E130304C20 gene | 1.55 | 0.00502 Mm.27740   |
| E130307H12Rik | RIKEN cDNA E130307H12 gene | 0.70 | 0.00383 Mm.28604   |

|               |                            |      |                  |
|---------------|----------------------------|------|------------------|
| E430007K15Rik | RIKEN cDNA E430007K15 gene | 1.26 | 0.0135 Mm.273990 |
| E430018J23Rik | RIKEN cDNA E430018J23 gene | 0.87 | 0.0286 Mm.219955 |
| E430025L02Rik | RIKEN cDNA E430025L02 gene | 0.74 | 0.0329 Mm.33498  |
| E430028B21Rik | RIKEN cDNA E430028B21 gene | 1.17 | 0.0464 Mm.290758 |
| F830020C16Rik | RIKEN cDNA F830020C16 gene | 0.74 | 0.00671 Mm.844   |
| G630041M05Rik | RIKEN cDNA G630041M05 gene | 1.44 | 0.037 Mm.245357  |
